# Supplementary material for: Mitochondrial flashes regulate ATP homeostasis in the heart
Source: eLife. 2017 Jul 10;6:e23908. doi: 10.7554/eLife.23908 (PMC5503511; doi:10.7554/eLife.23908)
Supplement: Figure 1—source data 1. — This file contains raw source data used to make the graphs presented in Figure 1B, Figure 1C and Figure 1—figure supplement 1. Excel software was used to graph all the quantitative data and perform statistical analyses. Student’s t-test was applied to determine the statistical significance. DOI: http://dx.doi.org/10.7554/eLife.23908.004 [file elife-23908-fig1-data1.xlsx]

## Sheet: Figure 1B
		50 uM	1 uM	2 uM
	Control	SS31	MitoTEMPO	CsA
	15.5478	4.79268	15.167	20.8371
	15.625	7.66694	26.6764	27.8658
	16.7969	7.1403	19.5732	26.4094
	16.4917	12.7782	19.0633	15.179
	16.0488	8.5095	21.0654	15.828
	29.1757	12.1502	20.1328	6.08347
	15.3879	18.826	15.5261	4.13598
	36.5293	13.9268	10.8341	8.90505
	44.7178	15.1067	15.2015	0
	53.2072	7.8266	11.3315
	35.2428	19.7141	15.8905
	18.9846	17.1172	23.0837
	19.276	21.258	16.7977
	17.8956	12.6666	23.0308
	23.6198	20.6133
	26.3959	35.4947
	37.9089
	33.0707
	18.78
	29.6713
	19.4618
	35.7805
N	22	16	14	9
Average	26.1644	14.7242	18.0981	13.916
SE	2.30836	1.89717	1.21244	3.29055
TTEST		0.000495738	0.00421376	0.00755337

## Sheet: Figure 1C
	Control	SS31	MitoTEMPO	CsA
exp 1	1	1.11494	1.20536	1.05561
exp 2	1	1.2794	1.31468	1.28038
exp 3	1	1.49952	1.40085	1.44142
exp 4	1	1.0838	1.1927	1.26105
exp 5	1	1.01612	1.13008	0.975609
exp 6	1	1.50571	1.19409	1.30821
Average	1	1.24992	1.23963	1.22038
SE	0	0.0873828	0.0404461	0.0704479
TTEST		0.0354063	0.00195346	0.0260084

## Sheet: Figure 1-figure supplement
time (s)	Control			SS31			mitoTEMPO			CsA
	Mean	SEM		Mean	SEM		Mean	SEM		Mean	SEM
1	1	0		1	0		1	0		1	0
2	0.992809	0.00637356		1.01103	0.0078225		1.00542	0.005906		0.992523	0.0074157
3	1.01189	0.00799731		0.996014	0.00860026		1.00527	0.00335705		0.983191	0.00941674
4	1.00144	0.0092487		0.996367	0.011023		1.01263	0.00655084		0.976594	0.0104776
5	1.00592	0.00923901		1.00208	0.00756308		1.01136	0.0073544		0.978321	0.00767223
6	1.00839	0.00992266		0.993968	0.00901664		1.00807	0.00753405		0.979421	0.0107326
7	1.01074	0.0108956		0.997246	0.00701706		1.01034	0.0101356		0.974951	0.00984346
8	1.00987	0.0109009		0.988975	0.00730567		1.00362	0.0125606		0.960263	0.0107467
9	1.00995	0.0122695		1.00577	0.00704343		1.01394	0.0118532		0.971743	0.0102302
10	1.01364	0.0125692		1.00326	0.00901657		1.0115	0.0132926		0.974321	0.0108454
11	0.987727	0.0128259		0.989124	0.00811915		0.999253	0.0112733		0.965252	0.0120239
12	1.11434	0.0288841		1.0669	0.0213794		1.11258	0.0262992		1.06286	0.0264711
13	1.28157	0.0488432		1.14971	0.038681		1.18908	0.0340262		1.17193	0.0414957
14	1.36443	0.046781		1.24992	0.0443425		1.24737	0.0342516		1.30919	0.049064
15	1.38017	0.0451294		1.32414	0.0476217		1.29838	0.0346276		1.35967	0.0519935
16	1.38573	0.0395915		1.38384	0.047632		1.35275	0.0307902		1.37528	0.0410346
17	1.39832	0.0397107		1.39585	0.0463883		1.39227	0.0285382		1.39892	0.0407499
18	1.38293	0.0481169		1.42586	0.0464702		1.42758	0.0299359		1.39213	0.0362794
19	1.37343	0.0535768		1.42806	0.046791		1.4302	0.0291039		1.36217	0.0424711
20	1.36308	0.0581942		1.42559	0.0455658		1.4223	0.0328542		1.34255	0.0449078
21	1.33618	0.063908		1.4192	0.0446892		1.40045	0.0367498		1.32013	0.0520562
22	1.32257	0.0715351		1.41314	0.0433738		1.34926	0.0436408		1.295	0.0569704
23	1.30482	0.0717183		1.40644	0.0439271		1.31963	0.0474049		1.27267	0.0572784
24	1.27098	0.0729878		1.38563	0.0479279		1.27852	0.0482767		1.23127	0.0572169
25	1.24577	0.0728081		1.37272	0.0518869		1.25975	0.0501059		1.23448	0.0588606
26	1.19421	0.0682945		1.35143	0.0550871		1.24777	0.0515072		1.18438	0.0528321
27	1.16772	0.0676583		1.32901	0.0509523		1.23025	0.0567457		1.18079	0.0541817
28	1.10977	0.0629913		1.3159	0.0562209		1.19387	0.0577568		1.14944	0.0526486
29	1.06489	0.0605106		1.26826	0.0569848		1.1647	0.0594933		1.13043	0.0538351
30	1.03363	0.0595909		1.24487	0.0569701		1.15114	0.0675887		1.11045	0.0538789
31	1.02523	0.0618492		1.23835	0.0585857		1.12734	0.0692026		1.08771	0.0546452
32	1.00322	0.0606751		1.21572	0.0601601		1.09931	0.0688612		1.0682	0.0544604
33	1.01205	0.0649369		1.23058	0.0545591		1.09784	0.059475		1.0384	0.0540629
34	1.00233	0.0615843		1.2203	0.0522334		1.06914	0.0529897		1.03075	0.0569437
35	0.972594	0.0646902		1.1961	0.0483521		1.04653	0.0495082		1.01741	0.055706
36	0.948349	0.0665533		1.20742	0.0526434		1.03123	0.0507396		0.981501	0.0542189
37	0.938217	0.0710161		1.18347	0.0545775		1.0203	0.0510826		0.966764	0.0542466
38	0.929153	0.0701393		1.16432	0.0522721		1.00414	0.0529057		0.94268	0.0554579
39	0.926586	0.070272		1.14989	0.0595642		0.986007	0.0536423		0.934627	0.0553211
40	0.955131	0.0726984		1.10418	0.0621347		0.979432	0.0527582		0.925047	0.0605503
41	0.94087	0.0689392		1.10239	0.0620862		0.990824	0.0532469		0.915123	0.0659777
42	0.958139	0.0771606		1.0848	0.0653622		0.986186	0.0605132		0.900281	0.0637778
43	0.973525	0.0758309		1.0758	0.0683466		0.968471	0.0605061		0.89816	0.0629309
44	0.969789	0.0817049		1.08675	0.0721115		0.96841	0.0654127		0.849047	0.0622296
45	0.947612	0.0769201		1.07925	0.0699769		0.967486	0.0638255		0.842018	0.0631703
46	0.927844	0.0757604		1.08495	0.0721231		0.954236	0.0605776		0.833089	0.0630437
47				1.07447	0.0794647		0.958348	0.0617354		0.83378	0.0651829
48							0.961065	0.0626099		0.845406	0.0769571
49							0.95204	0.0628316		0.836698	0.0863097
