# Supplementary material for: Mitochondrial flashes regulate ATP homeostasis in the heart
Source: eLife. 2017 Jul 10;6:e23908. doi: 10.7554/eLife.23908 (PMC5503511; doi:10.7554/eLife.23908)
Supplement: Figure 2—source data 1. — This file contains raw source data used to make the graphs presented in Figure 2A–2F. Excel software was used to graph all the quantitative data and perform statistical analyses. Student’s t-test was applied to determine the statistical significance. DOI: http://dx.doi.org/10.7554/eLife.23908.007 [file elife-23908-fig2-data1.xlsx]

## Sheet: Figure 2A
	substrate free	5.6mM glucose	15mM glucose	30mM glucose	0.6mM FFA	0.1mM pyruvate	1mM pyruvate	10mM pyruvate	10mM pyruvate washout	10mM pyruvate +α-CCA
	No substrate	5.6 mM	15 mM	30 mM	0.6 mM	0.1 mM	1 mM	10 mM	Washout	α-CCA
	1.42337	15.7237	28.4262	20.0544	2.84877	0.758919	4.10524	78.8159	3.43505	7.31975
	4.93549	0.637938	9.92182	9.78312	0.692688	0.7027	3.2011	58.8923	6.50519	8.07612
	0	1.27275	12.1479	15.2498	0	0	50.9527	68.3028	1.05544	14.78
	0	10.6971	29.267	3.40828	2.6666	1.3561	15.5131	43.3856	10.2311	12.3845
	2.67625	1.1228	1.99869	4.25287	0.662584	3.25138	6.55217	62.0536	1.32859	9.39551
	1.28672	1.11466	37.4757	1.57488	10.8351	3.17484	11.7931	29.3759	4.90308	16.3134
	1.27381	0.487812	3.60979	66.2402	3.10463	0	8.19877	42.1762	6.12509	21.0627
	0.63043	0.957961	4.21057	3.95276	9.9037	3.1009	4.09502	63.3429	4.66984	3.74875
	1.88254	1.86476	0	3.43815	13.8555	7.3331	4.58113	69.4589	4.79408	15.2937
	2.5088	1.8381	5.07313	43.4029	5.98424	3.05063	6.83651	36.2744	3.3503	13.9531
	0	2.36667	32.9421	3.85108	0	1.19277	5.69665	42.1236	4.09692	1.98591
	0.608192	1.50443	3.18663	2.84532	9.41845	0.594847	6.73142	24.7792	2.09304	3.91184
	0	0	1.53949	26.6623	4.5184	4.12525	6.1041	77.8693	4.25127	3.38016
	0	0.455169	0	34.9902	3.38367	1.17819	6.06821	42.3556	2.66959	8.18359
	0	1.34358	0	0.54402	5.05125	4.09557	2.74997	50.7858		10.0095
	0	0	2.90781	5.41693	19.0739	3.49985	8.75271	20.3986		8.94397
	2.27163		1.40903	4.18513	25.6522	5.65566	3.28026	54.8012		19.7019
	1.1272	6.06588	0.827348	0.505775	1.0857	6.13964	12.5759	25.9675		9.61965
	1.12387	0	0	5.51575	2.71007	6.4302	8.44509	42.9232		10.2991
	1.67347	1.06749	2.62397	2.71979	0.513934	4.28558	1.84456	16.0242		35.9531
	1.04726	5.21297	1.01358	1.32581	12.4422	0		48.1153		25.1524
	0	7.72461	1.48844	1.18064	1.88116	7.88659		50.6388		34.7019
	0	14.9783	0.968622		0	7.00414		31.2781		67.5443
	0	1.09632	1.32581		6.03911	1.97418		41.2281		40.5874
	0	0				0		68.945
	0.963909	1.20842				3.22972		50.7337
	1.87909	3.04677						39.3325
	0	2.93921						52.1766
	1.66383	14.212						32.6941
	0	11.3792						10.7214
		1.13901						17.29
		6.59598						34.1021
		2.15413						32.4401
		4.98383						27.5081
		0
		1.08864
		0
		0
		3.08349
		1.12209
Average	0.965862	3.34579	7.59848	11.8682	5.93016	3.07772	8.90388	43.7444	4.25061	16.7626
SEM	0.209718	0.704199	2.37419	3.60656	1.34366	0.487	2.34617	3.05015	0.631853	3.06669
TTEST		0.00226848	0.0104885	0.00651644	0.00126029	0.000338609	0.00316137	1.6659e-15	8.68505e-15	7.01096e-08
N	30	39	24	22	24	26	20	34	14	24

## Sheet: Figure 2B
	5.6mM glucose	10mM pyruvate
	3.85029	30.9716
	0.524679	5.50296
	0.705741	9.2278
	0	31.7466
	0.336108	4.25081
	0.804559	0.724707
	1.72927	10.2279
	1.69542	11.5632
	0.363761	20.2997
	0.349107	11.9392
	1.46784	4.53355
	2.27984	5.17696
		3.49301
Average	1.17555	11.5121
SEM	0.316785	2.80878
TTEST		0.00315744

## Sheet: Figure 2C
Perceval HR				Luciferin				Mitoflash
Time (s)	relative changes of percevalHR	N=39 cells		Time (s)	luciferin luminescence			Time (s)	Average	SEM	N
0	1			0	43.7268			25	1.04286	0.288649	7
10	0.996664			1	43.0996			75	0.957143	0.288649	7
20	1.00422			2	43.1844			125	2.12799	1.12174	7
30	0.997906			3	43.426			175	4.36602	1.30568	7
40	0.999298			4	43.3897			225	5.22488	1.78488	7
50	0.993844			5	43.732			275	6.89322	2.02535	7
60	0.998083			6	43.9856			325	7.88877	1.55244	7
70	1.00151			7	42.8052			375	8.33371	2.09932	7
80	1.00367			8	43.2707			425	11.0064	3.69216	7
90	1.00747			9	42.9202			475	12.7653	3.18111	7
100	1.01348			10	42.6813			525	12.423	4.18762	7
110	1.12771			11	42.9434			575	11.2514	1.99521	7
120	1.09907			12	43.3831			625	13.5173	3.69785	7
130	1.07396			13	43.5163			675	13.2108	4.45896	7
140	1.05204			14	43.4846
150	1.03703			15	43.7332
160	1.03017			16	42.7951
170	1.01772			17	43.2276
180	1.01166			18	43.3685
190	1.00576			19	43.0253
200	0.999744			20	42.8981
210	0.997			21	43.8133
220	0.992717			22	43.8394
230	0.988753			23	44.1049
240	0.98738			24	42.8309
250	0.986154			25	42.1718
260	0.980863			26	43.7695
270	0.984294			27	43.3932
280	0.980801			28	43.6565
290	0.978987			29	43.6601
300	0.977295			30	43.4202
310	0.971744			31	43.6251
320	0.96714			32	43.5459
330	0.973735			33	42.6906
340	0.97167			34	43.7244
350	0.968891			35	43.3723
360	0.964861			36	42.6136
370	0.966199			37	43.4338
380	0.963131			38	43.3449
390	0.958304			39	43.7336
400	0.958893			40	42.5425
410	0.956266			41	43.4782
420	0.956125			42	43.291
430	0.957258			43	42.6832
440	0.956094			44	43.0125
450	0.95471			45	43.0843
460	0.957134			46	43.2659
470	0.960961			47	43.678
480	0.956334			48	43.8768
490	0.956278			49	42.8089
500	0.955463			50	42.6829
510	0.958397			51	42.8707
520	0.95775			52	42.9543
530	0.956383			53	42.2036
540	0.959047			54	43.7244
550	0.965712			55	42.5285
560	0.963046			56	42.8719
570	0.965432			57	42.5819
580	0.965147			58	42.6541
590	0.959051			59	42.8629
600	0.963593			60	43.9537
610	0.96341			61	43.8072
620	0.965768			62	43.0431
630	0.963054			63	42.7016
640	0.966858			64	43.9474
650	0.965253			65	43.3869
660	0.965502			66	42.7619
670	0.968164			67	43.3021
680	0.970778			68	43.2472
690	0.97128			69	42.9952
700	0.966218			70	43.1649
				71	43.9142
				72	43.0865
				73	42.8026
				74	42.1233
				75	42.7884
				76	42.5807
				77	42.8443
				78	42.7779
				79	42.912
				80	43.6013
				81	42.815
				82	42.4555
				83	43.0816
				84	43.2965
				85	41.8484
				86	42.6441
				87	42.7694
				88	42.7132
				89	42.9293
				90	42.6905
				91	43.81
				92	43.293
				93	43.3081
				94	43.5175
				95	43.592
				96	42.6755
				97	43.6849
				98	43.6439
				99	43.1312
				100	42.7616
				101	42.5488
				102	43.3902
				103	43.7696
				104	43.9027
				105	44.739
				106	46.4593
				107	45.8281
				108	47.487
				109	47.2356
				110	47.1981
				111	47.7982
				112	48.3043
				113	48.3372
				114	48.2523
				115	47.3367
				116	47.2291
				117	47.9269
				118	48.3684
				119	48.2314
				120	48.0977
				121	47.8298
				122	49.525
				123	48.2769
				124	48.13
				125	48.9905
				126	48.9887
				127	50.2474
				128	50.7883
				129	49.9859
				130	49.3941
				131	49.5538
				132	49.004
				133	49.1946
				134	48.8948
				135	48.9935
				136	48.6487
				137	48.6067
				138	48.2014
				139	48.2675
				140	48.3835
				141	48.3924
				142	47.9673
				143	48.2702
				144	46.9587
				145	47.0022
				146	46.4693
				147	47.1014
				148	47.2407
				149	46.5927
				150	46.2452
				151	45.9963
				152	46.2114
				153	45.6625
				154	45.7374
				155	46.6648
				156	45.0921
				157	45.6046
				158	45.5129
				159	45.5506
				160	45.4006
				161	44.7298
				162	45.525
				163	43.8922
				164	44.0505
				165	44.6956
				166	43.8726
				167	44.176
				168	43.7566
				169	44.0937
				170	44.2139
				171	43.8421
				172	43.5718
				173	43.8652
				174	44.0514
				175	42.7604
				176	43.2798
				177	43.3494
				178	43.1857
				179	42.7411
				180	42.4294
				181	42.8237
				182	42.4569
				183	42.5022
				184	42.5108
				185	42.5053
				186	42.8924
				187	42.7815
				188	41.8943
				189	42.1714
				190	42.4199
				191	42.274
				192	42.0922
				193	42.2139
				194	41.7303
				195	40.7118
				196	42.2583
				197	42.2297
				198	41.5072
				199	41.9287
				200	41.2591
				201	40.7048
				202	41.6927
				203	41.5809
				204	41.5853
				205	41.3909
				206	40.7845
				207	41.3123
				208	41.5801
				209	41.2122
				210	41.2109
				211	41.4056
				212	41.077
				213	40.9255
				214	41.1731
				215	41.4918
				216	40.4672
				217	39.8994
				218	40.9325
				219	40.7554
				220	40.6035
				221	39.9863
				222	40.7897
				223	40.2737
				224	40.572
				225	40.5118
				226	40.6863
				227	40.1854
				228	40.3603
				229	40.6035
				230	41.2464
				231	40.6779
				232	39.6253
				233	39.881
				234	40.1992
				235	39.938
				236	40.4869
				237	39.3946
				238	40.2192
				239	40.2145
				240	40.3556
				241	40.1634
				242	40.753
				243	40.3681
				244	40.651
				245	40.457
				246	39.4371
				247	39.8835
				248	39.6899
				249	39.6133
				250	39.4313
				251	40.0712
				252	39.6462
				253	40.4629
				254	39.8634
				255	40.0814
				256	40.2829
				257	39.2081
				258	39.8492
				259	39.6141
				260	39.9708
				261	39.6063
				262	39.9703
				263	39.744
				264	40.8147
				265	40.2699
				266	40.2145
				267	40.08
				268	40.2155
				269	39.688
				270	40.0038
				271	39.7362
				272	38.7536
				273	39.7643
				274	40.0872
				275	39.4564
				276	39.8959
				277	38.8845
				278	39.084
				279	39.6876
				280	39.2281
				281	39.8782
				282	39.5494
				283	38.9579
				284	39.0446
				285	39.471
				286	39.6429
				287	39.3739
				288	39.5513
				289	39.6054
				290	39.8532
				291	39.2569
				292	39.5433
				293	40.4851
				294	39.8248
				295	39.4797
				296	39.541
				297	39.0583
				298	39.256
				299	39.6744
				300	39.7871
				301	39.5397
				302	39.8308
				303	39.3445
				304	39.2853
				305	40.0173
				306	39.755
				307	39.5231
				308	39.2441
				309	39.1656
				310	39.5869
				311	38.9141
				312	39.5015
				313	39.695
				314	39.4627
				315	39.2625
				316	38.9528
				317	39.4839
				318	39.5089
				319	39.2651
				320	39.2319
				321	39.067
				322	39.6318
				323	39.8569
				324	39.7601
				325	39.2349
				326	39.5701
				327	39.9792
				328	39.1554
				329	38.5297
				330	38.9598
				331	39.4393
				332	39.2789
				333	39.5257
				334	39.4384
				335	39.2965
				336	39.4425
				337	39.4671
				338	39.7073
				339	38.9947
				340	39.8907
				341	39.3928
				342	38.9339
				343	39.3776
				344	39.205
				345	38.808
				346	39.5964
				347	39.5896
				348	40.036
				349	39.1596
				350	39.183
				351	39.7974
				352	39.8712
				353	39.3275
				354	38.6062
				355	39.7773
				356	38.8961
				357	39.6793
				358	39.2389
				359	39.0622
				360	39.0536
				361	39.5926
				362	39.794
				363	38.3012
				364	38.7474
				365	38.5771
				366	38.5999
				367	38.7644
				368	38.8064
				369	38.3752
				370	39.0956
				371	38.9012
				372	38.6415
				373	38.0489
				374	38.3515
				375	37.8404
				376	39.054
				377	39.2299
				378	38.6923
				379	38.3612
				380	38.1365
				381	38.219
				382	38.7563
				383	39.0311
				384	38.5301
				385	38.6743
				386	38.571
				387	38.773
				388	38.9735
				389	38.6112
				390	38.0866
				391	38.3233
				392	39.2264
				393	38.7088
				394	38.8235
				395	38.0735
				396	38.6237
				397	38.4985
				398	37.9498
				399	38.2928
				400	38.4076
				401	37.8506
				402	38.8713
				403	38.6005
				404	38.9239
				405	39.0425
				406	38.8919
				407	38.9723
				408	37.8052
				409	38.2397
				410	38.7142
				411	38.3102
				412	39.6549
				413	39.6659
				414	38.7133
				415	39.246
				416	38.804
				417	38.7035
				418	38.7087
				419	38.5844
				420	39.1051
				421	39.1664
				422	38.0852
				423	37.9557
				424	39.5389
				425	38.4625
				426	38.2
				427	37.7789
				428	38.6455
				429	38.3565
				430	38.9251
				431	38.6833
				432	37.1716
				433	38.0881
				434	38.32
				435	37.5909
				436	38.3505
				437	37.2429
				438	38.7194
				439	37.7474
				440	37.3468
				441	37.571
				442	38.2422
				443	37.3165
				444	37.8031
				445	38.2664
				446	37.4523
				447	38.4472
				448	37.7928
				449	37.5328
				450	37.4961
				451	37.7693
				452	37.9716
				453	37.1033
				454	37.5501
				455	38.4299
				456	37.6512
				457	37.6149
				458	36.9935
				459	37.0522
				460	36.8751
				461	37.2895
				462	36.8996
				463	37.5164
				464	37.7699
				465	36.5179
				466	37.8199
				467	37.6187
				468	37.8813
				469	36.9226
				470	36.8165
				471	37.8169
				472	37.4897
				473	38.2171
				474	37.4228
				475	36.7017
				476	37.4365
				477	37.62
				478	36.9044
				479	37.5887
				480	36.8404
				481	36.6959
				482	36.8244
				483	37.0287
				484	37.5838
				485	36.5474
				486	36.7588
				487	37.4095
				488	37.6542
				489	37.5739
				490	36.7632
				491	36.7804
				492	36.9596
				493	37.0906
				494	37.3005
				495	37.4924
				496	37.5993
				497	36.8967
				498	37.1783
				499	37.2739
				500	37.1901
				501	36.8853
				502	36.9435
				503	37.1445
				504	36.6104
				505	36.7951
				506	36.2568
				507	37.3404
				508	36.6252
				509	37.2869
				510	36.5518
				511	36.9329
				512	36.7644
				513	36.7345
				514	36.8057
				515	36.5726
				516	36.3721
				517	36.6515
				518	37.2017
				519	37.2236
				520	36.9084
				521	37.6831
				522	35.7522
				523	36.411
				524	36.7128
				525	37.2854
				526	36.5711
				527	37.8583
				528	36.6672
				529	36.7481
				530	37.7042
				531	36.2734
				532	37.0128
				533	36.1909
				534	36.8532
				535	36.6872
				536	36.3246
				537	36.5496
				538	36.4695
				539	36.6522
				540	36.6057
				541	36.2971
				542	36.0192
				543	36.142
				544	36.0488
				545	36.1777
				546	35.8875
				547	35.7692
				548	36.9752
				549	37.3961
				550	36.7671
				551	36.951
				552	36.4465
				553	36.6033
				554	36.8246
				555	37.388
				556	36.9043
				557	36.5771
				558	36.996
				559	37.0567
				560	36.1653
				561	36.7033
				562	36.8876
				563	36.8624
				564	36.239
				565	36.1832
				566	36.6674
				567	36.0994
				568	35.7998
				569	36.687
				570	36.9854
				571	36.6391
				572	36.8088
				573	35.8879
				574	36.2376
				575	35.5718
				576	35.9071
				577	36.6649
				578	36.2757
				579	36.7254
				580	35.7123
				581	36.4059
				582	35.566
				583	35.9669
				584	36.6743
				585	36.1682
				586	36.309
				587	36.8897
				588	35.639
				589	36.407
				590	36.7775
				591	36.4496
				592	36.2264
				593	36.9023
				594	36.3916
				595	35.2359
				596	35.0509
				597	36.7696
				598	35.9075
				599	35.2999
				600	35.9985
				601	36.5521
				602	36.0828
				603	35.2518
				604	36.1591
				605	35.3171
				606	35.0592
				607	35.693
				608	36.0064
				609	35.7363
				610	35.9737
				611	35.5628
				612	35.0823
				613	36.1405
				614	36.1912
				615	35.9146
				616	35.5561
				617	35.8143
				618	35.9472
				619	35.4424
				620	35.9414
				621	35.3303
				622	35.4329
				623	35.6347
				624	35.222
				625	35.6351
				626	35.9416
				627	35.6833
				628	35.5297
				629	36.0838
				630	35.6481
				631	36.0406
				632	35.739
				633	34.9964
				634	35.024
				635	35.2004
				636	35.9565
				637	35.3616
				638	34.9928
				639	35.1779
				640	35.4694
				641	34.7484
				642	34.6818
				643	34.6414
				644	34.9733
				645	35.0503
				646	34.496
				647	35.1956
				648	35.0908
				649	35.4405
				650	35.6185
				651	34.7392
				652	34.7504
				653	35.2097
				654	35.8236
				655	34.9666
				656	35.0872
				657	35.3122
				658	35.0634
				659	35.0319
				660	34.3277
				661	34.6686
				662	35.1709
				663	34.5652
				664	35.0754
				665	35.3241
				666	34.7167
				667	34.5808
				668	34.883
				669	35.7929
				670	35.2669
				671	35.0498
				672	34.8868
				673	34.3179
				674	34.1393
				675	35.0813
				676	35.8371
				677	34.4454
				678	35.4502
				679	35.8087
				680	34.9756
				681	34.698
				682	34.4636
				683	34.4636
				684	35.4345
				685	34.9039
				686	34.9988
				687	34.2185
				688	34.4959
				689	35.5631
				690	34.8905
				691	34.437
				692	34.0225
				693	34.4712

## Sheet: Figure 2D
	5.6 mM glucose	10 mM pyruvate
	1.01725	1.16674
	1.02975	1.18794
	1.05415	1.24551
	0.938518	1.10918
	0.960333
Average	1	1.17734
SEM	0.0217578	0.0281622
TTEST		0.00245034

## Sheet: Figure 2E
	Glucose	Glucose + rotenone	Pyruvate
	67.889	79.112	65.664
	92.126	81.224	69.002
	68.308	82.382	68.418
	66.674	101.919	71.224
	95.313	91.443	77.944
	65.036	111.942	79.791
	97.462	84.17	84.819
	70.345	104.438	80.116
	69.088	108.937	103.424
	68.467	103.807	99.827
	83.319	99.126	101.657
	95.452	77.385	91.779
	79.968	88.744	86.092
	48.778	98.603	89.339
	79.177	81.6	91.319
	62.373	94.478	67.943
	68.125	91.846	102.098
	92.246	106.53	94.255
	59.954	95.012	90.198
	79.105	72.101	100.001
	58.237	66.017	91.008
	64.947	92.626	101.519
	65.217	107.315	92.398
	71.067	111.432	93.94
	55.024	93.602	80.336
	62.948	64.638	87.537
	48.969	95.011	67.895
	73.635	102.632	65.358
	73.474	71.887	68.942
	71.501	96.989	111.106
	64.122	100.525	92.573
	55.606	95.463	97.438
	71.514	90.929	79.667
	80.563	75.448	81.823
	75.716	107.651	80.806
	61.853	87.179	83.337
	47.717	95.768	87.631
	91.717	103.872	74.411
	87.643	102.935	82.497
	68.692	98.805	75.122
	85.288	118.145	74.812
	97.838	106.855	82.38
	79.481	102.959	90.212
	63.701	115.677	86.001
	81.376	110.172	93.565
	57.541	100.975	94.89
	55.668	99.077	98.932
	72.909	95.145	92.436
	67.192	92.097	70.248
	66.015	99.967	92.456
	86.796	109.338	83.307
	71.691	126.45	89.427
	93.838	98.727	94.287
	89.463	78.173	78.405
	79.44		107.219
	81.549		89.547
	59.581		77.578
	93.853		86.182
	94.339		91.002
	83.275		62.581
	95.067		89.172
	35.745		63.743
	87.49		86.269
	90.404		89.48
	89.43		72.134
	103.772		46.238
			88.98
Average	74.5774	95.7274	84.8
SEM	1.80767	1.79239	1.50706
N	66	54	67
TTEST		1.97398e-13	2.70934e-05

## Sheet: Figure 2F
	Time (s)	FAD
	0	1
	1.99685	1.00137
	4.00247	1.00052
	6.00311	1.00027
	8.00374	1.00178
	10.0006	1.00105
	12.0062	1.0067
	14.0031	1.01047
	16.0075	1.00976
	18.0081	1.02038
	20.0099	1.00964
	22.0068	1.01182
	24.0112	1.00508
	26.0081	1.00112
	28.0137	1.00729
	30.0143	0.985821
	32.015	0.994331
	34.0118	0.996274
	36.0174	0.992562
	38.0131	1.00242
	40.0187	0.993029
	42.0193	0.991803
	44.0212	0.997364
	46.0168	0.988854
	48.0224	0.986572
	50.0193	0.994617
	52.0249	0.987118
	54.0243	0.977209
	56.0262	0.988937
	58.023	0.989183
	60.0286	0.986885
	62.0243	0.994636
	64.0299	1.01004
	66.0305	1.00347
	68.0324	1.00757
	70.028	1.00971
	72.0336	1.00392
	74.0305	1.00119
	76.0361	1.00112
	78.0356	0.985127
	80.0374	0.993304
	82.0342	0.979333
	84.0387	0.980246
	86.0343	0.973821
	88.0399	0.969738
	90.0405	0.950047
	92.0424	0.947838
	94.038	0.947768
	96.0437	0.944056
	98.0405	0.94604
	100.046	0.918994
	102.046	0.929604
	104.047	0.924125
	106.044	0.927699
	108.05	0.928115
	110.046	0.929044
	112.051	0.92759
	114.052	0.928551
	116.054	0.922739
	118.049	0.928583
	120.055	0.921679
	122.052	0.907362
	124.057	0.908483
	126.057	0.902242
	128.059	0.894478
	130.055	0.907671
	132.06	0.899618
	134.057	0.902383
	136.062	0.900983
	138.063	0.896966
	140.064	0.888276
	142.06	0.889801
	144.066	0.887378
	146.063	0.893375
	148.067	0.882274
	150.068	0.882489
	152.07	0.887372
	154.067	0.883389
	156.071	0.883001
	158.068	0.885542
	160.074	0.889207
	162.074	0.889144
	164.075	0.883184
	166.072	0.882354
	168.077	0.88234
	170.073	0.878549
	172.079	0.885713
	174.079	0.892847
	176.081	0.876147
	178.077	0.888324
	180.082	0.879643
	182.079	0.883765
	184.085	0.880671
	186.084	0.888339
	188.086	0.885729
	190.083	0.89128
	192.089	0.886508
	194.084	0.895747
	196.09	0.903979
	198.09	0.896331
	200.092	0.891676
	202.088	0.884009
	204.094	0.8958
	206.09	0.887332
	208.096	0.884094
	210.095	0.881357
	212.097	0.870746
	214.094	0.871733
	216.099	0.87463
	218.095	0.871782
	220.101	0.874243
	222.102	0.865939
	224.102	0.86807
	226.099	0.882567
	228.105	0.881197
	230.102	0.878888
	232.106	0.879524
	234.107	0.878227
	236.108	0.88339
	238.105	0.884483
	240.11	0.886812
	242.107	0.894085
	244.112	0.892337
	246.113	0.885288
	248.113	0.888765
	250.11	0.891841
	252.116	0.886138
	254.112	0.892695
	256.116	0.889187
	258.117	0.888284
	260.118	0.887475
	262.115	0.882223
	264.12	0.879619
	266.117	0.882906
	268.122	0.878554
	270.123	0.887756
	272.123	0.876961
	274.12	0.872107
	276.126	0.883748
	278.123	0.877615
	280.127	0.880604
	282.128	0.881395
	284.13	0.876498
	286.127	0.876676
	288.131	0.869285
	290.128	0.872156
	292.134	0.872489
	294.134	0.867477
	296.135	0.873779
	298.132	0.864095
	300.137	0.870918
	302.133	0.868372
	304.139	0.876331
	306.139	0.867687
	308.141	0.871398
	310.137	0.865233
	312.142	0.867637
	314.139	0.862292
	316.145	0.861934
	318.144	0.864571
	320.146	0.872355
	322.143	0.869747
	324.148	0.853821
	326.144	0.861402
	328.15	0.867074
	330.15	0.87183
	332.152	0.863081
	334.148	0.864128
	336.153	0.855945
	338.15	0.864008
	340.156	0.858735
	342.155	0.866953
	344.157	0.868918
	346.154	0.869693
	348.158	0.875707
	350.155	0.868864
	352.161	0.868691
	354.161	0.873261
	356.162	0.864313
	358.159	0.870021
	360.165	0.868931
	362.161	0.855924
	364.166	0.868721
	366.166	0.863423
	368.168	0.8661
	370.165	0.87448
	372.17	0.871919
	374.166	0.873663
	376.172	0.870646
	378.173	0.880581
	380.173	0.882727
	382.17	0.878546
	384.176	0.876968
	386.171	0.876273
	388.177	0.875846
	390.178	0.878482
	392.18	0.883019
	394.175	0.885131
	396.181	0.889534
	398.178	0.876863
	400.183	0.875888
	402.183	0.882537
	404.185	0.870561
	406.181	0.878251
	408.187	0.877705
	410.183	0.882218
	412.188	0.884589
	414.189	0.879483
	416.191	0.881778
	418.186	0.881792
	420.192	0.863919
	422.189	0.849499
	424.195	0.859565
	426.194	0.859827
	428.196	0.89861
	430.193	1.00028
	432.197	1.16707
	434.193	1.36222
	436.198	1.53767
	438.199	1.66733
	440.201	1.76787
	442.196	1.83522
	444.202	1.86507
	446.199	1.8656
	448.205	1.85001
	450.204	1.82675
	452.206	1.79488
	454.203	1.73391
	456.208	1.66859
	458.204	1.60801
	460.21	1.53288
	462.21	1.46395
	464.212	1.38952
	466.208	1.3443
	468.213	1.28864
	470.21	1.23971
	472.216	1.2053
	474.215	1.17101
	476.217	1.14089
	478.214	1.12157
	480.218	1.10965
	482.215	1.10448
	484.221	1.09721
	486.221	1.07738
	488.222	1.07426
	490.219	1.06418
	492.224	1.06398
	494.221	1.05586
	496.226	1.03568
	498.226	1.03052
	500.228	1.01433
	502.225	1.0135
	504.229	1.00177
