# Supplementary material for: Mitochondrial flashes regulate ATP homeostasis in the heart
Source: eLife. 2017 Jul 10;6:e23908. doi: 10.7554/eLife.23908 (PMC5503511; doi:10.7554/eLife.23908)
Supplement: Figure 3—source data 1. — This file contains raw source data used to make the graphs presented in Figure 3A–3G. Excel software was used to graph all the quantitative data and perform statistical analyses. Student’s t-test was applied to determine the statistical significance. DOI: http://dx.doi.org/10.7554/eLife.23908.009 [file elife-23908-fig3-data1.xlsx]

## Sheet: Figure 3A
Ca2+ and cell contraction before, during and after pacing
Time (s)	Rhod4 fluorescence Intensity （a.u.）	cell length(μm)	Rhod4 fluorescence Intensity （F/F0）
0	16	109.119	1			Start time of mitoflash before, during and after pacing
0.00194	16.4	109.385	1.025			Cell 1	3.94973	4.94942	5.95289	5.95289	6.95258	7.95604	10.9551	11.9586	14.9577	15.9611	21.9668	21.9668	21.9668	22.9665	22.9665	23.97	25.9694	25.9694	25.9694	29.9719	31.9713	35.9776	35.9776	36.9773	37.9808	43.9865	48.9925	48.9925	52.995	58.9969	65.0026	71.0083	71.0083	73.0077	83.0197	96.0308	100.037	112.045	117.047	119.05	120.05	124.052	126.056
0.01469	15.9	108.853	0.99375
0.02263	15.3	109.651	0.95625
0.03658	16.2	109.385	1.0125			Cell 2	0	1.99561	1.99561	1.99561	2.99908	6.00193	8.00508	9.00478	11.0042	15.0105	15.0105	16.0102	16.0102	19.013	23.0193	24.019	24.019	24.019	25.0187	28.0216	29.025	35.027	36.0304	40.033	41.0327	41.0327	43.0358	43.0358	43.0358	48.0418	48.0418	49.0415	49.0415	50.0412	54.0475	55.0472	56.0469	60.0532	61.0529	62.0564	63.0561	63.0561	69.0618
0.04573	16.3	108.853	1.01875
0.05728	16.2	109.119	1.0125
0.06642	16.3	109.651	1.01875			Cell 3	1.94657	2.94626	3.94973	8.95196	11.9548	12.9545	12.9545	12.9545	12.9545	13.958	13.958	15.9574	15.9574	15.9574	17.9605	18.9602	20.9634	20.9634	20.9634	20.9634	23.9662	26.9691	26.9691	27.9688	28.9722	29.9719	29.9719	30.9716	30.9716	31.9713	31.9713	33.9745	33.9745	34.9779	35.9776	35.9776	36.9773	41.9833	42.983	42.983	44.9862	44.9862	47.989
0.07917	16.3	109.651	1.01875
0.08711	16.1	109.918	1.00625
0.09986	15.6	109.918	0.975
0.11021	15.9	109.385	0.99375
0.12176	15.2	109.651	0.95
0.1309	15.5	109.385	0.96875
0.14365	15.8	109.918	0.9875
0.15159	15.4	109.918	0.9625
0.16434	16.2	109.385	1.0125
0.17469	15.4	109.119	0.9625
0.18503	15.5	109.385	0.96875
0.19658	16.3	109.918	1.01875
0.20573	16.5	109.918	1.03125
0.21728	16.5	109.651	1.03125
0.22882	15.7	109.651	0.98125
0.23797	16.3	109.119	1.01875
0.24951	16	109.385	1
0.26106	15	109.385	0.9375
0.27981	15.7	110.184	0.98125
0.29496	15.4	109.651	0.9625
0.30291	16	109.651	1
0.31566	15.7	109.651	0.98125
0.3248	15.9	109.119	0.99375
0.33635	15.4	108.853	0.9625
0.3479	16.7	109.651	1.04375
0.35704	16.1	109.651	1.00625
0.36859	16	109.385	1
0.38014	15.7	108.853	0.98125
0.38928	15.8	109.119	0.9875
0.40083	16	109.918	1
0.41238	16.5	109.651	1.03125
0.42152	16.6	109.918	1.0375
0.43307	16.5	109.119	1.03125
0.44462	15.9	109.119	0.99375
0.45376	16.6	109.119	1.0375
0.46771	15.6	109.651	0.975
0.47686	15.7	109.651	0.98125
0.486	16.9	109.119	1.05625
0.49755	16.3	108.853	1.01875
0.5091	16.3	109.385	1.01875
0.52064	16.2	109.385	1.0125
0.52979	16.2	109.651	1.0125
0.54134	15	109.651	0.9375
0.55288	15.3	109.651	0.95625
0.56203	15.9	109.385	0.99375
0.57358	15.9	109.651	0.99375
0.58272	15.8	109.385	0.9875
0.59547	16.1	109.385	1.00625
0.60582	16	110.184	1
0.61616	15.1	109.651	0.94375
0.62651	16.6	109.651	1.0375
0.63686	15.1	109.651	0.94375
0.6484	15.4	109.119	0.9625
0.65995	15.6	109.918	0.975
0.66909	15.9	109.119	0.99375
0.68064	16.2	109.119	1.0125
0.69219	16.1	109.119	1.00625
0.70134	15.5	109.119	0.96875
0.71288	15.9	109.385	0.99375
0.72443	15.7	109.385	0.98125
0.73357	16.7	109.385	1.04375
0.74512	15.6	109.651	0.975
0.75427	15.2	110.184	0.95
0.76822	15.7	109.651	0.98125
0.77736	16.5	109.385	1.03125
0.78891	16.8	109.651	1.05
0.79805	16.1	109.651	1.00625
0.8096	16.2	109.119	1.0125
0.82115	16.5	109.651	1.03125
0.8303	16.7	109.385	1.04375
0.84184	15.7	109.651	0.98125
0.85339	16.3	109.651	1.01875
0.86253	15.9	109.918	0.99375
0.87528	16.1	109.918	1.00625
0.88323	16.3	109.385	1.01875
0.89598	16.1	109.385	1.00625
0.90632	16.6	108.587	1.0375
0.91667	15.8	109.119	0.9875
0.92701	17	109.119	1.0625
0.93976	15.7	109.119	0.98125
0.94771	15.5	108.853	0.96875
0.96046	15.9	109.119	0.99375
0.9696	15	109.651	0.9375
0.98115	16.8	110.184	1.05
0.9927	15.3	109.918	0.95625
1.00184	15.8	109.385	0.9875
1.01339	15.2	109.918	0.95
1.02494	16.1	109.918	1.00625
1.03408	15.9	109.918	0.99375
1.04563	15.2	110.982	0.95
1.05718	16.5	110.45	1.03125
1.06632	16.6	109.918	1.0375
1.07787	16.4	109.651	1.025
1.08942	16.2	110.184	1.0125
1.09856	15.9	109.651	0.99375
1.11011	16.7	109.119	1.04375
1.12166	15.4	109.119	0.9625
1.1308	15.3	109.651	0.95625
1.14475	16.1	109.918	1.00625
1.1539	16.1	108.587	1.00625
1.16304	15.7	108.853	0.98125
1.17459	16.4	110.45	1.025
1.18614	15.9	110.45	0.99375
1.19528	16	109.651	1
1.20683	16.3	110.45	1.01875
1.21838	15.1	109.385	0.94375
1.22752	15.4	109.119	0.9625
1.24027	16.4	108.587	1.025
1.24821	16.8	108.853	1.05
1.26096	15.3	109.651	0.95625
1.27131	15.9	109.385	0.99375
1.28166	15.4	108.853	0.9625
1.2932	15.7	109.385	0.98125
1.30355	16	109.385	1
1.31389	15.8	109.918	0.9875
1.32544	15.6	110.184	0.975
1.33459	15.7	109.385	0.98125
1.34614	15.7	110.184	0.98125
1.35768	16.6	110.184	1.0375
1.36683	16	109.918	1
1.37837	15.3	109.651	0.95625
1.38992	15.7	109.385	0.98125
1.39907	16.2	110.184	1.0125
1.41062	15.8	109.385	0.9875
1.42216	15.7	109.119	0.98125
1.43131	15.7	108.853	0.98125
1.44285	15.3	109.385	0.95625
1.4544	15.1	109.651	0.94375
1.46355	16	109.918	1
1.4751	15.7	109.651	0.98125
1.48664	16.3	109.918	1.01875
1.49579	17.2	109.385	1.075
1.50733	16	109.119	1
1.51888	15.2	108.853	0.95
1.53043	15.7	108.587	0.98125
1.53958	15.6	109.651	0.975
1.55112	16.5	109.651	1.03125
1.56027	15.8	109.651	0.9875
1.57302	15.2	110.716	0.95
1.58336	16	109.918	1
1.59251	16.2	109.651	1.0125
1.60526	16.6	109.651	1.0375
1.6144	16.3	109.119	1.01875
1.62595	16.6	109.918	1.0375
1.63629	16.2	109.385	1.0125
1.64664	16	108.853	1
1.65819	15.7	109.385	0.98125
1.66733	15.8	109.918	0.9875
1.67888	16.2	109.385	1.0125
1.69043	16.3	109.385	1.01875
1.70198	16.3	109.385	1.01875
1.71112	15.6	109.385	0.975
1.72267	16.6	109.119	1.0375
1.73422	15.4	108.853	0.9625
1.74336	15.7	108.853	0.98125
1.75491	16.9	109.119	1.05625
1.76405	15.8	108.853	0.9875
1.778	15.6	110.184	0.975
1.78715	16	109.385	1
1.7987	16.1	109.119	1.00625
1.80784	15.7	108.587	0.98125
1.81939	15.6	109.385	0.975
1.83094	16.3	108.853	1.01875
1.84008	15.3	109.119	0.95625
1.85163	16	109.385	1
1.86318	15.7	109.651	0.98125
1.87232	15.6	110.184	0.975
1.88387	15.2	110.45	0.95
1.89542	16.1	109.918	1.00625
1.90456	16.3	109.651	1.01875
1.91611	17	108.853	1.0625
1.92646	15.5	109.918	0.96875
1.9368	16.3	110.184	1.01875
1.94835	16.3	109.651	1.01875
1.95869	16.2	109.651	1.0125
1.97024	16.1	108.853	1.00625
1.97939	15.7	109.385	0.98125
1.99094	16.2	109.385	1.0125
2.00248	16.5	109.119	1.03125
2.01163	16.9	108.853	1.05625
2.02317	16.7	109.651	1.04375
2.03472	16.1	109.918	1.00625
2.04387	15.7	109.651	0.98125
2.05542	16.1	109.918	1.00625
2.06696	16.6	109.651	1.0375
2.07611	16.3	109.119	1.01875
2.08765	16	108.321	1
2.0992	15.9	109.119	0.99375
2.10835	16.2	109.119	1.0125
2.1199	16	108.587	1
2.13144	15.7	109.385	0.98125
2.14059	15.9	109.918	0.99375
2.15213	16.4	110.184	1.025
2.16368	15.9	110.184	0.99375
2.17283	16.6	109.385	1.0375
2.18438	15.6	109.385	0.975
2.19592	16.6	109.651	1.0375
2.20507	15.6	109.385	0.975
2.21782	15.7	109.119	0.98125
2.22576	16.4	109.119	1.025
2.23851	16	109.119	1
2.24886	15.9	108.587	0.99375
2.2592	15.6	108.587	0.975
2.27075	16.4	109.385	1.025
2.28109	15.4	109.651	0.9625
2.29144	15.9	109.119	0.99375
2.30299	15	109.385	0.9375
2.31213	16.1	108.853	1.00625
2.32368	16.2	109.119	1.0125
2.33523	15.9	109.119	0.99375
2.34437	15.9	109.918	0.99375
2.35952	15.9	109.918	0.99375
2.37467	15.9	110.45	0.99375
2.38502	15.6	109.385	0.975
2.39417	15.6	109.119	0.975
2.40691	16.5	109.119	1.03125
2.41726	16.3	108.853	1.01875
2.42761	15.8	108.587	0.9875
2.43915	15.3	109.119	0.95625
2.4567	15.5	108.853	0.96875
2.46585	16.1	109.918	1.00625
2.4774	15.9	109.385	0.99375
2.48654	16	109.385	1
2.49809	16	109.385	1
2.50964	16.5	109.119	1.03125
2.52118	15.7	109.385	0.98125
2.53633	15.4	110.45	0.9625
2.54548	15.9	110.184	0.99375
2.55703	15.7	109.651	0.98125
2.56617	16.3	109.651	1.01875
2.57892	15.2	109.385	0.95
2.58927	16.1	109.385	1.00625
2.59841	16.3	108.853	1.01875
2.61116	16.2	109.651	1.0125
2.62151	16.4	109.918	1.025
2.63065	16.9	109.385	1.05625
2.6434	15.8	108.853	0.9875
2.65254	16.1	108.587	1.00625
2.66409	16.3	109.651	1.01875
2.67564	16	108.853	1
2.68479	16.1	109.385	1.00625
2.69633	16.4	109.651	1.025
2.70548	16.2	109.651	1.0125
2.71702	15.9	109.385	0.99375
2.72857	16	109.918	1
2.73772	15.8	109.385	0.9875
2.74927	16.2	109.651	1.0125
2.76081	15.7	109.918	0.98125
2.76996	15.2	109.918	0.95
2.7815	16.4	109.119	1.025
2.79305	15.8	109.385	0.9875
2.8022	16.9	109.651	1.05625
2.81615	16.4	109.918	1.025
2.82529	16.4	108.853	1.025
2.83444	15.5	108.587	0.96875
2.84598	15.6	108.853	0.975
2.85753	16	109.651	1
2.86908	16	109.385	1
2.87823	16.5	109.651	1.03125
2.88977	14.9	109.385	0.93125
2.90132	15.8	109.385	0.9875
2.91046	15.9	109.918	0.99375
2.92201	16.2	109.918	1.0125
2.93116	16.3	109.918	1.01875
2.94391	15.7	110.184	0.98125
2.95425	16.1	108.587	1.00625
2.9634	15.4	108.853	0.9625
2.97615	17.1	109.385	1.06875
2.98649	16.1	108.853	1.00625
2.99564	15.8	109.119	0.9875
3.00839	15.4	109.119	0.9625
3.01753	15.8	109.918	0.9875
3.02908	15.9	109.385	0.99375
3.04063	17.1	109.385	1.06875
3.04977	15.7	109.119	0.98125
3.06132	16.2	109.119	1.0125
3.07287	16.6	109.651	1.0375
3.08201	16	109.918	1
3.09356	15.6	110.184	0.975
3.10511	15.5	109.385	0.96875
3.11425	16.2	109.385	1.0125
3.1258	15.8	109.385	0.9875
3.13735	16.7	109.119	1.04375
3.14649	15	109.651	0.9375
3.15804	15.6	109.651	0.975
3.16959	16.3	109.119	1.01875
3.17873	15.9	109.119	0.99375
3.19028	16.1	109.119	1.00625
3.20183	16.2	108.853	1.0125
3.21097	16	109.651	1
3.22372	15.3	108.853	0.95625
3.23166	16.5	109.385	1.03125
3.24441	16.4	109.119	1.025
3.25476	15.7	109.385	0.98125
3.26631	15.8	109.651	0.9875
3.27545	15.7	110.184	0.98125
3.287	15.8	109.651	0.9875
3.29734	16.3	109.385	1.01875
3.30889	16	109.119	1
3.31924	16.4	109.918	1.025
3.32959	15.7	109.651	0.98125
3.34113	15.9	109.385	0.99375
3.35028	17.2	109.651	1.075
3.36182	16	109.119	1
3.37337	16	108.853	1
3.38252	16.7	109.651	1.04375
3.39407	15.9	109.651	0.99375
3.40561	16.8	109.119	1.05
3.41476	16.1	108.853	1.00625
3.42871	15.5	109.385	0.96875
3.43545	15.9	109.385	0.99375
3.4494	16.3	109.918	1.01875
3.45855	16.1	109.918	1.00625
3.47009	15.8	109.385	0.9875
3.47924	16.1	109.651	1.00625
3.49078	16.3	109.918	1.01875
3.50233	15.8	110.716	0.9875
3.51148	15.9	110.184	0.99375
3.52303	15.4	110.184	0.9625
3.53457	15.6	109.651	0.975
3.54372	15.2	109.651	0.95
3.55647	15.8	108.853	0.9875
3.56441	15.9	108.853	0.99375
3.57716	15.9	109.651	0.99375
3.58751	16.8	109.651	1.05
3.59905	16.1	108.587	1.00625
3.6094	16	108.853	1
3.61974	15.4	109.119	0.9625
3.63129	16	109.651	1
3.64044	16.1	109.651	1.00625
3.65319	16.1	109.385	1.00625
3.66233	14.9	109.385	0.93125
3.67388	16	109.918	1
3.68422	16.1	109.385	1.00625
3.69457	15.7	109.119	0.98125
3.70612	15.9	109.119	0.99375
3.71526	15.5	109.119	0.96875
3.72681	15.8	109.385	0.9875
3.73836	15.7	109.119	0.98125
3.7475	16.2	109.651	1.0125
3.76145	17.1	109.385	1.06875
3.7706	15.8	108.853	0.9875
3.77974	15.8	110.184	0.9875
3.79129	14.9	109.385	0.93125
3.80284	16	110.45	1
3.81198	16.2	109.918	1.0125
3.82593	16	110.184	1
3.83508	15.8	110.45	0.9875
3.84422	15.3	109.918	0.95625
3.85817	15.6	109.385	0.975
3.86732	15.6	109.119	0.975
3.87887	15.6	109.119	0.975
3.88801	16.3	109.119	1.01875
3.89956	17.1	108.587	1.06875
3.9087	15.8	108.321	0.9875
3.92145	16.3	109.119	1.01875
3.9318	15.8	109.918	0.9875
3.94094	16	109.651	1
3.95369	15.9	110.184	0.99375
3.96404	16.3	110.184	1.01875
3.97439	16.4	109.385	1.025
3.98593	16.1	109.651	1.00625
3.99508	16.3	109.651	1.01875
4.00662	16.4	109.385	1.025
4.01697	16.3	109.119	1.01875
4.02732	15.7	109.119	0.98125
4.03887	16.6	109.385	1.0375
4.05041	15.9	108.587	0.99375
4.05956	15.4	109.119	0.9625
4.0711	16.5	108.587	1.03125
4.08265	15.4	108.853	0.9625
4.0918	15	109.651	0.9375
4.10335	16.4	109.918	1.025
4.11489	15.6	109.651	0.975
4.12404	15.4	109.385	0.9625
4.13799	16	110.184	1
4.14713	15.9	109.385	0.99375
4.15628	16.1	109.918	1.00625
4.16783	16.9	109.119	1.05625
4.17937	15.5	108.853	0.96875
4.18852	15.8	109.385	0.9875
4.20006	16.2	108.853	1.0125
4.21161	15.8	109.119	0.9875
4.22076	15.5	109.385	0.96875
4.23231	15.9	109.119	0.99375
4.24385	15.6	109.385	0.975
4.253	15.9	109.918	0.99375
4.26454	16.4	109.651	1.025
4.27609	16.3	109.651	1.01875
4.28524	16.3	108.587	1.01875
4.29799	16.7	109.385	1.04375
4.30593	16.1	109.119	1.00625
4.31868	16.3	109.385	1.01875
4.32902	16.4	109.385	1.025
4.33937	15.7	108.853	0.98125
4.35092	16.2	109.651	1.0125
4.36006	15.7	109.651	0.98125
4.37161	15.7	109.918	0.98125
4.38316	16.1	109.119	1.00625
4.3923	16.1	109.651	1.00625
4.40385	16.3	109.119	1.01875
4.4154	16.2	109.385	1.0125
4.42454	15.9	109.385	0.99375
4.43609	17	109.385	1.0625
4.44764	16.6	109.385	1.0375
4.45678	16.5	109.119	1.03125
4.46833	16.6	109.119	1.0375
4.47988	16.3	108.853	1.01875
4.48902	15.2	109.119	0.95
4.50297	16.6	109.651	1.0375
4.51212	16.4	109.385	1.025
4.52126	16.3	109.651	1.01875
4.53281	16.3	109.119	1.01875
4.54436	15.4	109.385	0.9625
4.5535	15.5	109.385	0.96875
4.56505	16.5	109.385	1.03125
4.5766	15.6	109.385	0.975
4.58574	15.2	109.918	0.95
4.59849	15.3	109.918	0.95625
4.60884	17.5	109.119	1.09375
4.61798	16	109.385	1
4.63073	16.4	109.119	1.025
4.63988	15.7	109.651	0.98125
4.65142	16.5	109.119	1.03125
4.66177	15.9	109.385	0.99375
4.67212	16.3	109.119	1.01875
4.68367	16.2	109.119	1.0125
4.69881	16.9	109.651	1.05625
4.71637	15.9	109.651	0.99375
4.72551	16.1	109.651	1.00625
4.73706	15.9	109.385	0.99375
4.7462	16.6	108.853	1.0375
4.75775	17.6	109.651	1.1
4.7693	16	109.918	1
4.77844	16.9	109.651	1.05625
4.78999	16.1	109.119	1.00625
4.80154	15.2	109.119	0.95
4.81068	15.6	109.651	0.975
4.82223	16.4	109.918	1.025
4.83378	15.6	109.918	0.975
4.84292	15.8	109.119	0.9875
4.85447	15.7	109.119	0.98125
4.86602	15.1	109.385	0.94375
4.87516	16.2	110.45	1.0125
4.88671	16.2	110.45	1.0125
4.89706	15.4	109.651	0.9625
4.9086	15.7	110.184	0.98125
4.91895	15.9	109.918	0.99375
4.9293	16.2	109.651	1.0125
4.93964	15.5	109.918	0.96875
4.94999	15.7	109.918	0.98125
4.96154	15.5	109.651	0.96875
4.97308	16.7	109.651	1.04375
4.98223	16.2	109.651	1.0125
4.99378	15.5	109.385	0.96875
5.00532	15.7	109.651	0.98125
5.01447	16.5	109.119	1.03125
5.02602	16.5	108.587	1.03125
5.03756	16	109.119	1
5.04671	16.4	108.853	1.025
5.06066	16.2	109.385	1.0125
5.0674	16	109.651	1
5.08135	15.5	109.385	0.96875
5.0905	16.1	109.119	1.00625
5.10204	16.3	109.651	1.01875
5.11119	15.6	109.385	0.975
5.12274	16.2	110.184	1.0125
5.13428	16.2	110.184	1.0125
5.14343	15.6	109.385	0.975
5.15498	15.5	109.385	0.96875
5.16652	16.3	109.119	1.01875
5.17567	15.2	109.651	0.95
5.18842	15.6	109.119	0.975
5.19636	16.3	108.853	1.01875
5.20911	15.1	109.651	0.94375
5.21946	16.7	109.651	1.04375
5.231	16.5	109.918	1.03125
5.24015	15.7	109.119	0.98125
5.2529	15.6	109.119	0.975
5.26204	16.2	110.184	1.0125
5.27359	16.2	109.385	1.0125
5.28394	15.8	109.385	0.9875
5.29428	15.7	109.918	0.98125
5.30583	15.4	109.651	0.9625
5.31498	16	109.119	1
5.32652	16.6	109.651	1.0375
5.33807	16.5	109.651	1.03125
5.34722	16.6	109.651	1.0375
5.35876	16.1	109.119	1.00625
5.37031	15.7	109.651	0.98125
5.37946	15.8	109.385	0.9875
5.391	16	109.918	1
5.40255	16.4	109.385	1.025
5.4117	15.8	109.918	0.9875
5.42565	15.7	109.918	0.98125
5.43479	15.8	109.651	0.9875
5.44394	15.9	109.918	0.99375
5.45789	16.7	109.651	1.04375
5.46703	15.3	110.184	0.95625
5.47618	15.3	109.119	0.95625
5.48772	15.7	110.716	0.98125
5.49927	17.3	109.918	1.08125
5.50842	16.2	109.651	1.0125
5.52116	16.1	109.385	1.00625
5.53151	15.9	109.119	0.99375
5.54066	15.8	109.119	0.9875
5.5534	15.5	109.918	0.96875
5.56375	16.4	109.385	1.025
5.5729	16.2	109.918	1.0125
5.58564	15.9	109.918	0.99375
5.59479	15.4	109.651	0.9625
5.60634	16.1	109.385	1.00625
5.61788	15.2	109.385	0.95
5.62703	15.7	108.853	0.98125
5.63858	16.2	109.385	1.0125
5.64772	16.1	109.385	1.00625
5.65927	15.6	109.385	0.975
5.67082	15.8	109.119	0.9875
5.68236	15.9	108.853	0.99375
5.69151	15.7	108.587	0.98125
5.70306	15.8	109.119	0.9875
5.7146	16.4	109.119	1.025
5.72375	16.6	109.651	1.0375
5.7353	15.4	109.119	0.9625
5.74684	17.1	108.853	1.06875
5.75599	16.1	109.385	1.00625
5.76754	16.3	109.651	1.01875
5.77668	16.3	109.651	1.01875
5.79063	16.7	109.651	1.04375
5.79978	16.3	109.651	1.01875
5.81132	15	108.587	0.9375
5.82047	16	108.853	1
5.83202	15.8	109.385	0.9875
5.84356	16.3	109.651	1.01875
5.85271	15.9	108.853	0.99375
5.86426	15.5	109.651	0.96875
5.8758	16.3	109.119	1.01875
5.88495	16	109.385	1
5.8965	15.9	109.918	0.99375
5.90684	16.7	108.853	1.04375
5.91839	15.5	109.119	0.96875
5.92874	15.5	110.45	0.96875
5.93908	16.3	109.651	1.01875
5.95063	16.6	108.587	1.0375
5.95978	15.6	108.853	0.975
5.97132	16.2	108.853	1.0125
5.98287	15.8	109.385	0.9875
5.99202	15.9	109.918	0.99375
6.00356	15.5	109.385	0.96875
6.01271	15.1	109.385	0.94375
6.02426	16.6	109.119	1.0375
6.0358	16.4	109.918	1.025
6.04735	15.8	109.385	0.9875
6.0565	15.9	109.651	0.99375
6.06804	15.7	109.385	0.98125
6.07959	16.4	109.385	1.025
6.08874	16.4	109.651	1.025
6.10028	15.6	109.651	0.975
6.11183	16.1	109.119	1.00625
6.12098	15.6	109.119	0.975
6.13372	15.4	109.651	0.9625
6.14167	16.4	108.853	1.025
6.15562	15.7	109.385	0.98125
6.16476	15.5	109.385	0.96875
6.17631	15.7	108.321	0.98125
6.18546	16.1	108.587	1.00625
6.197	15.5	109.651	0.96875
6.20855	16.5	109.385	1.03125
6.2177	16.4	109.918	1.025
6.23044	16.6	110.184	1.0375
6.23839	16.4	110.184	1.025
6.25114	15.9	109.651	0.99375
6.26148	15.3	109.119	0.95625
6.27183	16.4	109.119	1.025
6.28338	14.7	109.651	0.91875
6.29252	15.5	109.119	0.96875
6.30407	16.5	109.918	1.03125
6.31562	15.9	109.385	0.99375
6.32476	15.4	108.853	0.9625
6.33631	15	109.119	0.9375
6.34786	16.3	108.853	1.01875
6.357	16	109.385	1
6.36855	15.5	109.119	0.96875
6.3801	15.7	109.651	0.98125
6.38924	16.5	109.385	1.03125
6.40319	15.6	109.119	0.975
6.41234	16.2	109.385	1.0125
6.42148	15.8	109.119	0.9875
6.43303	16.4	109.385	1.025
6.44458	15.7	109.651	0.98125
6.45372	16.6	109.385	1.0375
6.46647	16.1	109.119	1.00625
6.47442	16.2	109.385	1.0125
6.48836	16.6	109.119	1.0375
6.49751	16.3	109.651	1.01875
6.50906	16.2	109.918	1.0125
6.5182	16.2	109.385	1.0125
6.53095	15.8	109.918	0.9875
6.5389	16.1	110.45	1.00625
6.55164	15.7	109.385	0.98125
6.56199	16.5	109.385	1.03125
6.57354	16.5	109.119	1.03125
6.58268	16.5	109.385	1.03125
6.59543	16.9	109.119	1.05625
6.60458	16.1	108.853	1.00625
6.61612	16	109.119	1
6.62767	16.7	109.918	1.04375
6.63682	16.9	110.184	1.05625
6.64836	15.7	109.651	0.98125
6.65751	16.2	109.385	1.0125
6.66906	15.5	109.918	0.96875
6.6806	15.9	109.651	0.99375
6.69215	15.9	108.853	0.99375
6.7013	16.1	109.119	1.00625
6.71284	15.7	109.918	0.98125
6.72439	16.1	108.587	1.00625
6.73354	16.1	109.385	1.00625
6.74508	15.7	109.651	0.98125
6.75423	16.5	108.587	1.03125
6.76818	16.3	108.853	1.01875
6.77732	16.9	108.853	1.05625
6.78647	16.7	109.385	1.04375
6.79802	16.7	109.119	1.04375
6.80956	14.8	109.651	0.925
6.82111	15.2	108.853	0.95
6.83026	15.5	108.853	0.96875
6.8418	15.7	109.651	0.98125
6.85335	15.6	108.853	0.975
6.8625	15.8	108.587	0.9875
6.87885	15.1	109.385	0.94375
6.894	15.8	109.385	0.9875
6.90554	15.3	109.119	0.95625
6.91469	16	109.385	1
6.92624	15.9	108.853	0.99375
6.93778	17	109.651	1.0625
6.94693	16.6	109.651	1.0375
6.95848	15.8	109.385	0.9875
6.97002	16.5	108.587	1.03125
6.97917	16.5	108.853	1.03125
6.99072	16.1	109.651	1.00625
7.00226	15.2	109.918	0.95
7.01141	16	109.651	1
7.02296	15.1	109.651	0.94375
7.0345	16.7	108.853	1.04375
7.04365	16.8	109.385	1.05
7.0552	15.7	108.853	0.98125
7.06674	15.9	108.853	0.99375
7.07589	15.9	109.385	0.99375
7.08864	16.5	109.385	1.03125
7.09658	16.6	109.119	1.0375
7.11053	16.3	109.119	1.01875
7.11968	16.9	110.184	1.05625
7.13122	15.7	109.918	0.98125
7.14037	16.6	110.184	1.0375
7.15312	16.1	109.385	1.00625
7.16346	16.4	109.651	1.025
7.17261	15.2	108.853	0.95
7.18416	15.2	108.853	0.95
7.1945	15.6	108.587	0.975
7.20605	15.2	109.385	0.95
7.2164	16.1	109.651	1.00625
7.22674	16	109.918	1
7.23829	15.5	109.385	0.96875
7.24744	15.9	109.918	0.99375
7.25898	15.4	109.651	0.9625
7.27053	16.2	109.651	1.0125
7.27968	16.3	109.385	1.01875
7.29362	15.4	109.651	0.9625
7.30277	16.3	109.651	1.01875
7.31192	16.7	109.119	1.04375
7.32346	15.2	109.385	0.95
7.33501	16.7	109.119	1.04375
7.34656	16	109.651	1
7.3557	15.8	109.651	0.9875
7.36725	14.9	109.385	0.93125
7.3764	15.9	109.119	0.99375
7.38794	16.2	109.119	1.0125
7.39949	16	109.651	1
7.41104	15.4	109.918	0.9625
7.42018	16.8	109.385	1.05
7.43173	16.4	109.651	1.025
7.44088	15.9	108.853	0.99375
7.45362	16.4	109.119	1.025
7.46397	15.4	110.184	0.9625
7.47312	16.7	109.918	1.04375
7.48586	16.4	108.587	1.025
7.49621	15.8	109.918	0.9875
7.50656	15.9	109.119	0.99375
7.5169	15.9	108.321	0.99375
7.52845	16.1	109.651	1.00625
7.5376	15.8	109.918	0.9875
7.55034	16.8	110.184	1.05
7.55949	15.4	109.385	0.9625
7.57104	15.2	109.385	0.95
7.58258	15.6	109.651	0.975
7.59173	15.4	109.119	0.9625
7.60328	16.6	108.587	1.0375
7.61482	16.8	109.119	1.05
7.62397	16.4	109.651	1.025
7.63552	15.8	108.587	0.9875
7.64706	16.8	109.651	1.05
7.65621	14.9	109.385	0.93125
7.66776	15.8	109.385	0.9875
7.6793	16.3	108.853	1.01875
7.68845	15.9	108.587	0.99375
7.7	16.4	109.119	1.025
7.71154	15.8	108.587	0.9875
7.72069	15.9	108.853	0.99375
7.73344	15.6	108.853	0.975
7.74138	15.5	109.119	0.96875
7.75533	16.4	108.321	1.025
7.76448	15.9	108.587	0.99375
7.77602	16.8	109.385	1.05
7.78517	15.6	110.716	0.975
7.79792	15.3	109.651	0.95625
7.80586	16.2	109.918	1.0125
7.81861	15.9	109.918	0.99375
7.82896	15.4	109.918	0.9625
7.8393	16.1	109.918	1.00625
7.85085	16.7	110.184	1.04375
7.8612	15.4	110.184	0.9625
7.87154	15.7	109.918	0.98125
7.88309	16.1	109.651	1.00625
7.89224	15.6	109.119	0.975
7.90378	16.2	109.385	1.0125
7.91533	15.9	108.587	0.99375
7.92448	16.1	108.853	1.00625
7.93602	16.6	108.853	1.0375
7.94757	15.9	109.119	0.99375
7.95672	16.1	109.918	1.00625
7.96826	15.5	111.248	0.96875
7.97981	15.9	109.918	0.99375
7.98896	15.2	109.385	0.95
8.0005	16.2	109.385	1.0125
8.01205	17	109.651	1.0625
8.0212	16	109.918	1
8.03274	16.2	109.651	1.0125
8.04429	16.2	109.119	1.0125
8.05344	15.3	109.385	0.95625
8.06498	16.4	109.385	1.025
8.07653	16.2	109.918	1.0125
8.08568	15.7	109.385	0.98125
8.09722	15.3	109.385	0.95625
8.10877	15.4	110.184	0.9625
8.11792	16	109.651	1
8.13066	16	109.385	1
8.14101	16.1	109.385	1.00625
8.15016	16.8	109.119	1.05
8.1629	16.1	109.385	1.00625
8.17325	15.6	109.918	0.975
8.1824	15.7	109.918	0.98125
8.19514	15.9	110.45	0.99375
8.20429	16.6	109.651	1.0375
8.21584	16.5	109.651	1.03125
8.22618	16.3	108.587	1.01875
8.23653	16.5	109.918	1.03125
8.24808	16.2	109.918	1.0125
8.25722	15.4	109.385	0.9625
8.26877	15.6	109.918	0.975
8.28032	16	109.651	1
8.28946	15.9	109.651	0.99375
8.30101	15.9	109.918	0.99375
8.31256	15.8	110.716	0.9875
8.3217	16.5	109.918	1.03125
8.33565	16	109.119	1
8.3448	15.7	108.321	0.98125
8.35394	14.9	109.385	0.93125
8.36789	14.9	109.651	0.93125
8.37704	15.5	109.385	0.96875
8.38618	15.9	109.385	0.99375
8.40013	15.8	109.385	0.9875
8.40928	15.5	109.651	0.96875
8.41842	16.2	109.651	1.0125
8.42997	15.7	109.651	0.98125
8.44152	15.5	109.119	0.96875
8.45306	15.8	109.651	0.9875
8.46221	17	109.651	1.0625
8.47376	15.7	109.918	0.98125
8.4829	15.8	109.385	0.9875
8.49565	16.1	110.184	1.00625
8.506	15.6	109.651	0.975
8.51514	15.8	109.651	0.9875
8.52789	16.5	108.853	1.03125
8.53704	16	109.119	1
8.54858	15.7	109.651	0.98125
8.55893	15.6	109.918	0.975
8.56928	16	109.651	1
8.58082	16.1	109.918	1.00625
8.58997	16.2	108.853	1.0125
8.60392	16.4	109.651	1.025
8.61186	15.9	109.918	0.99375
8.62461	15.9	109.119	0.99375
8.63376	15.6	109.651	0.975
8.6453	15.2	109.385	0.95
8.65685	14.9	109.385	0.93125
8.666	17.1	109.119	1.06875
8.67754	15.6	109.651	0.975
8.68669	15.7	108.853	0.98125
8.70064	15.8	109.119	0.9875
8.70978	15.4	109.119	0.9625
8.72133	15.7	109.918	0.98125
8.73048	16.1	109.651	1.00625
8.74202	16.4	109.918	1.025
8.75357	15.9	109.651	0.99375
8.76272	16.1	109.385	1.00625
8.77426	15.9	109.385	0.99375
8.78581	15.9	109.918	0.99375
8.79496	15.8	109.119	0.9875
8.8065	17.1	109.119	1.06875
8.81805	15.8	108.853	0.9875
8.8272	16	109.119	1
8.83874	16	108.587	1
8.84909	15.9	108.321	0.99375
8.85944	16	108.587	1
8.87098	15.5	109.918	0.96875
8.88133	15.7	110.716	0.98125
8.89288	15.2	110.982	0.95
8.90202	16	109.918	1
8.91357	15.8	109.385	0.9875
8.92512	16.2	110.184	1.0125
8.93426	16.6	109.918	1.0375
8.94581	15.9	109.918	0.99375
8.95736	16	109.651	1
8.9665	16.2	109.385	1.0125
8.97805	15.4	109.918	0.9625
8.9896	15.9	108.853	0.99375
8.99874	15.7	108.853	0.98125
9.01029	16.2	108.853	1.0125
9.02184	16.6	108.853	1.0375
9.03098	16.6	109.651	1.0375
9.04253	16.4	109.385	1.025
9.06008	16.3	109.651	1.01875
9.07403	15.7	108.853	0.98125
9.08197	16.2	108.853	1.0125
9.09592	16.5	109.651	1.03125
9.10507	16.6	109.918	1.0375
9.11661	15.6	109.385	0.975
9.12576	15.8	109.651	0.9875
9.13851	15.9	109.918	0.99375
9.14645	16.3	109.385	1.01875
9.1592	16.5	109.651	1.03125
9.16955	16.3	109.651	1.01875
9.18109	16	109.385	1
9.19024	16.2	109.119	1.0125
9.20299	15.8	109.119	0.9875
9.21093	15.9	109.119	0.99375
9.22368	15.9	108.853	0.99375
9.23403	16	109.385	1
9.24437	15.7	109.918	0.98125
9.25592	15.6	108.853	0.975
9.26507	16.2	109.385	1.0125
9.27661	16.5	109.119	1.03125
9.28816	15.7	109.385	0.98125
9.29731	15.6	109.385	0.975
9.30885	16.9	109.385	1.05625
9.3204	15.6	109.119	0.975
9.32955	16	109.918	1
9.3435	15.9	109.385	0.99375
9.35024	15.8	108.587	0.9875
9.36419	15.8	108.853	0.9875
9.37333	15.7	109.119	0.98125
9.38488	16.2	109.651	1.0125
9.39403	16	109.651	1
9.40798	16	109.918	1
9.41712	15.9	109.651	0.99375
9.42627	15.8	109.385	0.9875
9.43781	15.7	108.853	0.98125
9.44936	16.1	108.853	1.00625
9.45851	15.9	109.651	0.99375
9.47005	16.2	109.918	1.0125
9.4816	15.5	109.918	0.96875
9.49195	15.1	109.119	0.94375
9.50229	16.1	109.119	1.00625
9.51384	16.1	110.184	1.00625
9.52299	15.3	109.385	0.95625
9.53573	15.5	108.853	0.96875
9.54488	15.8	109.119	0.9875
9.55643	16.8	109.119	1.05
9.56797	15.3	108.321	0.95625
9.57712	15.5	108.853	0.96875
9.58867	16	108.853	1
9.59781	16.1	109.119	1.00625
9.60936	15.2	109.651	0.95
9.62091	15.8	110.184	0.9875
9.63245	16.3	110.45	1.01875
9.6416	15.8	109.119	0.9875
9.65315	15.7	109.651	0.98125
9.66469	16.5	108.853	1.03125
9.67384	15.4	109.119	0.9625
9.68539	15.5	109.119	0.96875
9.69693	15.9	109.385	0.99375
9.70608	16.1	109.918	1.00625
9.71763	15.9	109.918	0.99375
9.72677	15.7	109.918	0.98125
9.73832	15.7	109.651	0.98125
9.74987	15.2	109.918	0.95
9.76141	15.6	109.651	0.975
9.77056	16.1	108.853	1.00625
9.78211	15.9	108.853	0.99375
9.79365	15.9	108.853	0.99375
9.8028	16.6	108.853	1.0375
9.81435	15.5	109.385	0.96875
9.82349	15.5	109.918	0.96875
9.83624	16	109.385	1
9.84659	15.1	109.651	0.94375
9.85693	16.5	110.184	1.03125
9.86848	16.5	109.651	1.03125
9.87883	15.9	109.651	0.99375
9.88917	16.3	109.918	1.01875
9.89952	16	110.45	1
9.90987	16.2	109.385	1.0125
9.92141	16.5	109.119	1.03125
9.93296	16.5	109.385	1.03125
9.94211	16.3	108.853	1.01875
9.95365	16.3	108.853	1.01875
9.9652	15.6	109.918	0.975
9.97435	16	109.119	1
9.98589	15.7	109.651	0.98125
9.99744	16	109.385	1
10.0066	16.2	109.651	1.0125
10.0181	16.8	109.651	1.05
10.0297	15.7	110.184	0.98125
10.0388	15.6	109.918	0.975
10.0528	15.7	109.651	0.98125
10.0619	17.1	109.385	1.06875
10.0711	15.9	109.651	0.99375
10.0826	15.5	109.385	0.96875
10.0942	15.7	109.651	0.98125
10.1033	14.7	109.119	0.91875
10.1149	15.9	109.119	0.99375
10.1264	16.4	109.385	1.025
10.1356	16.2	109.385	1.0125
10.1471	15.7	109.385	0.98125
10.1586	15.6	109.651	0.975
10.1678	14.9	110.184	0.93125
10.1805	15.7	109.651	0.98125
10.1885	15.5	109.385	0.96875
10.2012	16	109.651	1
10.2116	15.9	109.119	0.99375
10.2219	16.5	108.853	1.03125
10.2335	15.9	109.119	0.99375
10.2426	16.7	108.321	1.04375
10.2542	14.8	109.119	0.925
10.2657	15.7	108.853	0.98125
10.2749	15.5	109.385	0.96875
10.2888	14.9	109.385	0.93125
10.2967	15.9	109.385	0.99375
10.3095	16.5	108.853	1.03125
10.3186	15.7	109.385	0.98125
10.3302	15.2	109.918	0.95
10.3393	15.5	109.385	0.96875
10.3533	15.9	109.385	0.99375
10.3624	15.7	109.119	0.98125
10.3716	14.8	108.853	0.925
10.3831	15.8	108.853	0.9875
10.3947	15.9	109.119	0.99375
10.4038	15.6	109.651	0.975
10.4154	15	109.651	0.9375
10.4269	16.2	109.119	1.0125
10.436	14.8	109.651	0.925
10.4488	15.9	109.119	0.99375
10.4591	15.5	109.385	0.96875
10.4683	16.4	109.651	1.025
10.481	16.8	109.651	1.05
10.489	15.6	109.651	0.975
10.5017	16.3	109.385	1.01875
10.5121	15.4	108.853	0.9625
10.5236	15.7	109.651	0.98125
10.534	15.9	109.918	0.99375
10.5443	15.8	109.651	0.9875
10.5547	15.7	108.587	0.98125
10.5662	16.2	109.385	1.0125
10.5778	15.8	109.651	0.9875
10.5869	15.1	109.651	0.94375
10.5984	15.1	110.184	0.94375
10.6076	15.8	109.119	0.9875
10.6191	15.7	109.918	0.98125
10.6307	15.8	109.651	0.9875
10.6422	16	109.119	1
10.6514	16.5	108.587	1.03125
10.6629	15.8	109.385	0.9875
10.6745	16.1	109.651	1.00625
10.6836	15.3	110.45	0.95625
10.6952	15.8	110.184	0.9875
10.7067	15.8	109.918	0.9875
10.7159	16.2	109.385	1.0125
10.7274	15.2	109.119	0.95
10.7366	15.5	109.385	0.96875
10.7505	16.5	109.385	1.03125
10.7597	16	109.651	1
10.7712	16.1	108.853	1.00625
10.7804	15.7	109.385	0.98125
10.7919	16.1	109.918	1.00625
10.8034	16.3	109.918	1.01875
10.8126	15.9	109.119	0.99375
10.8241	15.6	109.385	0.975
10.8333	15.8	109.119	0.9875
10.846	15.6	109.651	0.975
10.8564	15.7	109.918	0.98125
10.8655	15.4	110.184	0.9625
10.8783	15.7	108.853	0.98125
10.8874	16.9	109.119	1.05625
10.899	15.3	109.651	0.95625
10.9105	15.1	109.385	0.94375
10.9197	16.4	108.853	1.025
10.9312	15.6	109.651	0.975
10.9415	16.9	109.651	1.05625
10.9543	15.3	110.716	0.95625
10.9622	16.1	109.651	1.00625
10.975	15.7	109.385	0.98125
10.9841	15.8	109.385	0.9875
10.9957	16	109.651	1
11.0072	15.7	109.651	0.98125
11.0164	15.4	109.119	0.9625
11.0279	16	109.119	1
11.0395	15.6	109.119	0.975
11.0486	15.1	109.119	0.94375
11.0602	15.6	108.853	0.975
11.0717	15.4	109.651	0.9625
11.0808	15.7	109.651	0.98125
11.0924	15.9	109.651	0.99375
11.1039	15.2	109.119	0.95
11.1131	15.6	109.385	0.975
11.1246	15.5	109.651	0.96875
11.1362	16.5	109.385	1.03125
11.1453	16.3	109.651	1.01875
11.1581	16.6	110.184	1.0375
11.166	15.8	109.385	0.9875
11.1788	16.3	109.918	1.01875
11.1891	16.8	108.853	1.05
11.1995	15.6	108.853	0.975
11.211	15.5	110.184	0.96875
11.2214	15.6	110.45	0.975
11.2401	16.4	110.184	1.025
11.2553	15.2	110.184	0.95
11.2644	16.6	109.385	1.0375
11.2759	15.2	110.184	0.95
11.2851	16.4	109.651	1.025
11.2966	16.3	109.651	1.01875
11.3082	15.2	109.651	0.95
11.3173	15.9	110.184	0.99375
11.3301	15.8	109.918	0.9875
11.338	15.3	109.651	0.95625
11.3508	15.5	109.651	0.96875
11.3611	16.6	109.651	1.0375
11.3727	15	109.918	0.9375
11.3818	16.1	110.45	1.00625
11.3934	16.1	109.651	1.00625
11.4037	16	109.385	1
11.4141	15.6	109.651	0.975
11.4268	16.6	109.385	1.0375
11.4347	15.1	109.119	0.94375
11.4475	15.8	109.119	0.9875
11.4566	15.8	109.385	0.9875
11.4682	15.2	109.385	0.95
11.4797	15.6	109.119	0.975
11.4889	15.9	108.853	0.99375
11.5004	15.5	109.385	0.96875
11.512	15.9	109.651	0.99375
11.5211	15.5	108.587	0.96875
11.5327	15.9	109.119	0.99375
11.5442	15.4	109.119	0.9625
11.5534	15.8	109.918	0.9875
11.5649	16.1	110.184	1.00625
11.5765	15.2	109.918	0.95
11.5856	15.6	109.918	0.975
11.5971	15.5	109.918	0.96875
11.6087	15.3	110.184	0.95625
11.6179	16.4	110.716	1.025
11.6294	15.6	108.853	0.975
11.6409	15.6	109.651	0.975
11.6501	16	108.853	1
11.6628	15.9	109.651	0.99375
11.6708	16.5	109.385	1.03125
11.6835	16.3	109.918	1.01875
11.6939	16.6	109.651	1.0375
11.7054	16.5	109.651	1.03125
11.7146	16.5	109.119	1.03125
11.7273	15.6	108.587	0.975
11.7353	15.9	109.119	0.99375
11.748	16.1	109.918	1.00625
11.7584	16.2	110.184	1.0125
11.7687	14.9	110.184	0.93125
11.7803	15.4	110.45	0.9625
11.7894	15.7	110.45	0.98125
11.8009	16.3	109.918	1.01875
11.8125	15.5	109.385	0.96875
11.8216	16.1	109.119	1.00625
11.8332	15.8	109.918	0.9875
11.8447	15.8	109.385	0.9875
11.8539	15.7	109.119	0.98125
11.8678	15.2	109.385	0.95
11.8746	15.5	109.119	0.96875
11.8885	15.8	108.853	0.9875
11.8977	15.9	109.119	0.99375
11.9092	16	109.119	1
11.9184	16.5	109.651	1.03125
11.9299	15.5	109.119	0.96875
11.9414	16.3	108.853	1.01875
11.9506	14.9	109.385	0.93125
11.9633	15.3	109.651	0.95625
11.9713	15	109.385	0.9375
11.9852	15.4	109.385	0.9625
11.9944	15.7	109.385	0.98125
12.0059	15.8	109.651	0.9875
12.0175	15.6	108.853	0.975
12.0266	16.4	109.385	1.025
12.0382	15.3	109.119	0.95625
12.0473	15.2	109.918	0.95
12.0601	16.2	109.385	1.0125
12.0704	15.6	109.651	0.975
12.0795	16.3	109.651	1.01875
12.0923	15.8	109.651	0.9875
12.1014	16	109.651	1
12.113	16.4	109.651	1.025
12.1245	15.3	109.385	0.95625
12.1337	16	109.119	1
12.1452	15.7	109.385	0.98125
12.1568	15.7	109.385	0.98125
12.1659	15.1	109.119	0.94375
12.1775	16.6	109.385	1.0375
12.1866	15.8	109.385	0.9875
12.2006	15.9	110.184	0.99375
12.2097	15.1	110.184	0.94375
12.2213	16.5	110.184	1.03125
12.2304	15.8	109.651	0.9875
12.2419	15.1	110.184	0.94375
12.2535	15.3	108.853	0.95625
12.2627	15.6	109.385	0.975
12.2742	15.8	109.119	0.9875
12.2857	16	109.119	1
12.2949	15.7	109.651	0.98125
12.3064	16.1	109.119	1.00625
12.318	15.5	109.119	0.96875
12.3271	15.4	108.853	0.9625
12.3387	16	109.119	1
12.3502	15.5	109.918	0.96875
12.3594	16	110.184	1
12.3709	16.7	109.651	1.04375
12.3813	14.8	109.918	0.925
12.3916	15.9	109.918	0.99375
12.4032	16.1	109.918	1.00625
12.4135	15.2	109.119	0.95
12.4251	15.4	109.918	0.9625
12.4342	17	109.385	1.0625
12.4457	15.3	108.587	0.95625
12.4573	16.1	109.651	1.00625
12.4664	15.7	109.918	0.98125
12.478	15.5	109.385	0.96875
12.4895	15.9	109.651	0.99375
12.4987	15.9	109.651	0.99375
12.5102	15.1	109.651	0.94375
12.5218	16	109.651	1
12.5309	14.9	110.184	0.93125
12.5425	16.2	109.651	1.0125
12.554	15.7	109.918	0.98125
12.5632	14.8	109.651	0.925
12.5747	15.3	109.651	0.95625
12.5862	15.5	108.587	0.96875
12.5954	15.3	108.587	0.95625
12.6069	15.5	109.651	0.96875
12.6185	16.5	109.918	1.03125
12.6276	15.9	109.385	0.99375
12.6404	16	109.385	1
12.6483	16.2	109.385	1.0125
12.6623	15.7	109.651	0.98125
12.6714	16.1	109.651	1.00625
12.683	15.1	109.119	0.94375
12.6921	15.5	108.587	0.96875
12.7049	15.8	108.853	0.9875
12.7128	15.8	109.385	0.9875
12.7256	16.2	109.385	1.0125
12.7359	15.7	109.918	0.98125
12.7462	16	110.184	1
12.7578	16	109.385	1
12.7681	15.5	109.918	0.96875
12.7785	16	108.853	1
12.79	15.2	109.119	0.95
12.7992	15.9	109.918	0.99375
12.8107	15.6	110.184	0.975
12.8223	16.5	109.119	1.03125
12.8314	16.4	109.385	1.025
12.843	15.5	109.385	0.96875
12.8545	15.7	109.385	0.98125
12.8637	16.3	109.651	1.01875
12.8752	15.7	108.853	0.98125
12.8867	15.4	108.853	0.9625
12.8959	15.8	109.385	0.9875
12.9075	15.7	109.651	0.98125
12.919	15.6	109.651	0.975
12.9281	15.8	108.853	0.9875
12.9421	15.8	109.119	0.9875
12.9512	16.1	109.651	1.00625
12.9604	15.6	109.385	0.975
12.9731	16	109.918	1
12.9835	16	110.184	1
12.9926	15.5	109.918	0.96875
13.0054	15.6	109.651	0.975
13.0157	15.9	110.184	0.99375
13.0249	16	109.385	1
13.0376	15.7	109.119	0.98125
13.048	15.8	109.651	0.9875
13.0571	15.4	109.651	0.9625
13.0686	15.4	109.385	0.9625
13.079	16.2	108.853	1.0125
13.0905	15.3	109.651	0.95625
13.1009	15.6	109.119	0.975
13.1112	15.8	109.119	0.9875
13.1228	16.3	109.651	1.01875
13.1343	15.9	109.651	0.99375
13.1435	15.3	108.853	0.95625
13.155	15.6	108.587	0.975
13.1642	15.8	108.321	0.9875
13.1757	15.8	109.385	0.9875
13.1873	14.9	109.385	0.93125
13.1964	15.9	109.385	0.99375
13.208	15.7	109.385	0.98125
13.2195	16	109.651	1
13.231	16	109.651	1
13.2402	16.5	109.119	1.03125
13.2517	16.4	109.385	1.025
13.2633	16.3	109.385	1.01875
13.2724	15.5	109.385	0.96875
13.284	15.7	109.119	0.98125
13.2931	15.8	109.918	0.9875
13.3071	15.3	109.651	0.95625
13.3162	15.3	109.651	0.95625
13.3326	16.4	109.385	1.025
13.3441	16.1	108.853	1.00625
13.3533	16.5	109.651	1.03125
13.3648	15.7	108.853	0.98125
13.374	16.2	109.385	1.0125
13.3879	16.4	109.385	1.025
13.3971	16.6	109.918	1.0375
13.4146	15.2	110.45	0.95
13.4238	16.3	108.853	1.01875
13.4353	16.2	109.385	1.0125
13.4468	15.3	109.385	0.95625
13.456	16.5	108.853	1.03125
13.4675	16.6	108.853	1.0375
13.4803	15.9	109.119	0.99375
13.4954	15.6	109.119	0.975
13.5046	16.1	109.651	1.00625
13.5161	15.7	109.651	0.98125
13.5277	16.1	109.651	1.00625
13.5368	15.9	109.385	0.99375
13.5484	15.3	109.918	0.95625
13.5599	16	109.651	1
13.5691	16.6	109.119	1.0375
13.5806	15.6	108.853	0.975
13.5922	16.6	109.918	1.0375
13.6013	16.2	109.918	1.0125
13.6128	16.2	110.184	1.0125
13.6244	16.1	109.651	1.00625
13.6335	15.7	109.918	0.98125
13.6451	15.5	109.651	0.96875
13.6566	15.4	109.385	0.9625
13.6658	14.8	109.385	0.925
13.6773	16.2	109.119	1.0125
13.6889	15.1	109.119	0.94375
13.698	15.9	109.385	0.99375
13.7108	15.1	109.918	0.94375
13.7187	15.4	110.184	0.9625
13.7315	16	109.918	1
13.7418	16.5	109.651	1.03125
13.7522	15.6	108.587	0.975
13.7637	15.7	108.853	0.98125
13.774	15.9	109.119	0.99375
13.7844	16.6	109.651	1.0375
13.7959	16.4	110.184	1.025
13.8051	16.1	109.651	1.00625
13.8166	16.1	109.918	1.00625
13.8282	16.2	109.119	1.0125
13.8373	15.3	109.385	0.95625
13.8489	16.1	109.119	1.00625
13.8604	15.9	109.651	0.99375
13.8696	15.6	109.651	0.975
13.8811	16	109.651	1
13.8927	15.6	109.651	0.975
13.9018	15	109.119	0.9375
13.9133	16.2	109.651	1.0125
13.9249	16.2	109.651	1.0125
13.934	15.4	109.918	0.9625
13.9456	15.3	109.119	0.95625
13.9571	16.1	109.385	1.00625
13.9663	16.2	109.119	1.0125
13.9778	15.2	109.385	0.95
13.9894	15.2	109.651	0.95
13.9985	15.7	109.918	0.98125
14.0113	16.2	110.982	1.0125
14.0192	15.1	110.184	0.94375
14.0332	15.7	110.716	0.98125
14.0423	15.8	110.184	0.9875
14.0539	16.2	109.918	1.0125
14.063	16.1	109.119	1.00625
14.0757	15.7	109.119	0.98125
14.0861	15.5	109.385	0.96875
14.0952	16.5	109.918	1.03125
14.108	16	109.651	1
14.1171	15	110.184	0.9375
14.1287	16	109.385	1
14.139	15.8	109.119	0.9875
14.1494	16	108.853	1
14.1609	15.5	109.385	0.96875
14.1701	16.7	108.853	1.04375
14.1816	16.3	109.385	1.01875
14.1932	15.9	110.184	0.99375
14.2023	16.3	109.918	1.01875
14.2163	16.5	109.385	1.03125
14.223	15.8	109.119	0.9875
14.237	16.2	109.385	1.0125
14.2461	15.8	108.853	0.9875
14.2576	15.7	109.119	0.98125
14.2668	15.8	109.119	0.9875
14.2807	15.5	109.385	0.96875
14.2899	15.6	108.853	0.975
14.299	15.8	110.184	0.9875
14.313	16.4	110.45	1.025
14.3221	15.6	109.918	0.975
14.3337	15.8	109.918	0.9875
14.3428	15.9	109.119	0.99375
14.3544	15	108.853	0.9375
14.3635	16.1	109.651	1.00625
14.3763	15.9	109.651	0.99375
14.3866	16.7	109.651	1.04375
14.3957	16	109.385	1
14.4085	15.3	109.385	0.95625
14.4188	16.2	109.385	1.0125
14.4292	16.8	109.119	1.05
14.4395	15	109.385	0.9375
14.4499	16.2	109.918	1.0125
14.4614	16	109.119	1
14.473	15.4	109.119	0.9625
14.4821	16.4	108.853	1.025
14.4937	16.2	109.119	1.0125
14.5052	15	109.385	0.9375
14.5144	16.2	110.184	1.0125
14.5259	15.9	109.385	0.99375
14.5375	15.3	109.385	0.95625
14.5466	15.2	109.119	0.95
14.5581	16	109.119	1
14.5697	16.3	108.587	1.01875
14.5788	15.8	109.385	0.9875
14.5904	15.9	109.918	0.99375
14.6019	15.7	109.651	0.98125
14.6111	16.1	110.45	1.00625
14.6226	15.6	110.184	0.975
14.6342	15.3	109.918	0.95625
14.6433	15.3	109.385	0.95625
14.6549	15.6	109.918	0.975
14.6664	15.9	110.45	0.99375
14.6756	16.7	109.119	1.04375
14.6871	15.8	110.45	0.9875
14.6987	15.7	110.716	0.98125
14.7078	15.8	109.651	0.9875
14.7194	16.1	109.918	1.00625
14.7309	15.8	109.651	0.9875
14.74	16.2	110.184	1.0125
14.7516	15.8	109.119	0.9875
14.7619	15.6	109.651	0.975
14.7735	16.1	109.651	1.00625
14.7838	16.3	110.184	1.01875
14.7942	16.1	109.918	1.00625
14.8057	16.2	109.651	1.0125
14.8149	16.3	109.385	1.01875
14.8264	16.7	109.651	1.04375
14.838	15.3	109.119	0.95625
14.8471	16.1	109.119	1.00625
14.8587	15.2	108.853	0.95
14.8702	16.1	109.651	1.00625
14.8794	15.4	109.385	0.9625
14.8909	16.3	109.385	1.01875
14.9024	16	109.385	1
14.9116	15.7	109.918	0.98125
14.9231	16	110.184	1
14.9347	15.5	110.184	0.96875
14.9438	15.6	110.716	0.975
14.9554	16.1	110.45	1.00625
14.9669	15.7	109.651	0.98125
14.9761	16.3	109.651	1.01875
14.9888	16.2	108.853	1.0125
14.9968	15.8	108.853	0.9875
15.0107	16.4	109.918	1.025
15.0199	15.5	109.918	0.96875
15.0314	15.2	109.119	0.95
15.0405	14.9	109.385	0.93125
15.0533	15.6	109.651	0.975
15.0636	16	110.184	1
15.0728	15.6	110.45	0.975
15.0843	15.4	109.651	0.9625
15.0947	16.8	108.853	1.05
15.1062	15.8	108.587	0.9875
15.1166	15.4	109.119	0.9625
15.1269	16.1	109.385	1.00625
15.1385	15.2	109.385	0.95
15.1488	15.8	109.119	0.9875
15.1592	16.1	109.651	1.00625
15.1707	16.1	110.45	1.00625
15.1799	15.6	110.716	0.975
15.1938	15.3	110.45	0.95625
15.2029	16.6	109.651	1.0375
15.2121	15.5	109.385	0.96875
15.2236	15.2	108.853	0.95
15.2352	16.3	108.321	1.01875
15.2443	15.4	108.587	0.9625
15.2583	14.8	108.853	0.925
15.2674	15.6	108.853	0.975
15.2766	16.4	108.853	1.025
15.2881	16.5	108.587	1.03125
15.2997	16.2	108.853	1.0125
15.3088	15.8	109.651	0.9875
15.3228	15.5	109.918	0.96875
15.3319	16.2	109.119	1.0125
15.3435	15.5	109.385	0.96875
15.3526	16.1	109.651	1.00625
15.3642	16	109.651	1
15.3733	16.1	109.385	1.00625
15.386	15.4	109.385	0.9625
15.3964	15.9	109.918	0.99375
15.4055	15.9	109.918	0.99375
15.4183	15	109.651	0.9375
15.4286	15.9	109.385	0.99375
15.4378	14.8	109.119	0.925
15.4505	15.8	109.651	0.9875
15.4597	15.5	109.651	0.96875
15.4712	15.8	109.918	0.9875
15.4816	15.5	109.918	0.96875
15.4919	16.4	109.385	1.025
15.5035	14.6	109.385	0.9125
15.515	15.7	110.184	0.98125
15.5242	15.7	109.119	0.98125
15.5357	16.3	109.385	1.01875
15.5472	15	108.853	0.9375
15.5564	15.3	109.119	0.95625
15.5679	15.6	109.385	0.975
15.5771	15.9	109.385	0.99375
15.591	16.3	110.184	1.01875
15.6002	16	109.651	1
15.6117	16.3	108.853	1.01875
15.6209	15.8	109.385	0.9875
15.6324	15.8	110.184	0.9875
15.644	16	109.385	1
15.6591	16.5	110.45	1.03125
15.6743	15.8	110.45	0.9875
15.6834	15.9	109.385	0.99375
15.6926	15.6	109.918	0.975
15.7065	14.9	110.45	0.93125
15.7157	16.3	109.119	1.01875
15.7272	15.2	108.587	0.95
15.7363	15.3	108.321	0.95625
15.7479	16.3	108.321	1.01875
15.757	16	108.853	1
15.7698	16.6	108.587	1.0375
15.7801	16.4	109.119	1.025
15.7893	15.7	109.119	0.98125
15.802	16.2	109.918	1.0125
15.8124	16.4	109.119	1.025
15.8227	15.7	109.651	0.98125
15.8331	16.3	109.651	1.01875
15.8446	15.9	109.385	0.99375
15.855	15.7	109.651	0.98125
15.8665	15	110.184	0.9375
15.8757	15.8	109.385	0.9875
15.8872	15.6	109.119	0.975
15.8987	15.7	109.651	0.98125
15.9079	15.6	109.385	0.975
15.9194	15.6	109.918	0.975
15.9286	16.7	110.45	1.04375
15.9401	15.4	109.119	0.9625
15.9517	16	108.853	1
15.9632	15.9	109.385	0.99375
15.9724	15.8	108.853	0.9875
15.9839	15.5	109.385	0.96875
15.9955	16.1	110.184	1.00625
16.0046	16	109.651	1
16.0161	16.2	109.385	1.0125
16.0277	14.7	109.918	0.91875
16.0369	15.4	109.385	0.9625
16.0484	15.5	109.385	0.96875
16.0599	15.6	109.651	0.975
16.0691	16	109.119	1
16.0818	15	109.385	0.9375
16.0898	16.4	108.853	1.025
16.1037	15.2	109.385	0.95
16.1129	15.9	109.651	0.99375
16.1244	16.3	109.651	1.01875
16.1336	16.5	109.385	1.03125
16.1451	15.7	109.918	0.98125
16.1567	16	109.918	1
16.1658	16.1	109.918	1.00625
16.1774	15.9	109.119	0.99375
16.1877	15.7	109.119	0.98125
16.1992	15.9	108.853	0.99375
16.2096	15.6	109.385	0.975
16.2199	16.2	109.385	1.0125
16.2315	16.2	109.119	1.0125
16.2406	16.4	109.651	1.025
16.2522	16	109.651	1
16.2637	16.2	109.651	1.0125
16.2729	16.8	109.385	1.05
16.2844	15.5	109.119	0.96875
16.296	16.2	109.119	1.0125
16.3051	15.9	108.853	0.99375
16.3167	15.7	108.853	0.98125
16.3282	15.9	109.119	0.99375
16.3374	15.9	109.385	0.99375
16.3489	16.1	109.385	1.00625
16.3605	15.4	109.651	0.9625
16.3696	15.8	109.385	0.9875
16.3811	15.5	109.119	0.96875
16.3927	16.2	109.651	1.0125
16.4018	15.7	109.651	0.98125
16.4146	17	109.385	1.0625
16.4225	15.7	109.119	0.98125
16.4365	16.3	109.385	1.01875
16.4456	16.4	108.853	1.025
16.4572	16	108.587	1
16.4663	15.9	108.853	0.99375
16.4791	16.5	109.651	1.03125
16.4894	16.4	109.119	1.025
16.4986	15.5	109.119	0.96875
16.5113	15.9	108.587	0.99375
16.5205	15.4	109.119	0.9625
16.532	15.8	109.651	0.9875
16.5423	15.4	109.651	0.9625
16.5527	16.4	109.385	1.025
16.5642	16.4	109.651	1.025
16.5734	16.5	108.853	1.03125
16.5849	16	109.119	1
16.5965	17.5	108.587	1.09375
16.6056	16.4	109.651	1.025
16.6172	16.8	109.119	1.05
16.6287	15.6	109.651	0.975
16.6379	15.5	108.853	0.96875
16.6518	15.8	108.587	0.9875
16.6609	15.3	108.587	0.95625
16.6701	15.5	109.385	0.96875
16.6817	15.8	109.385	0.9875
16.6932	15	108.587	0.9375
16.7023	15.1	109.918	0.94375
16.7163	16.1	109.918	1.00625
16.7254	15.5	109.651	0.96875
16.7346	16.3	109.918	1.01875
16.7461	15.8	108.853	0.9875
16.7577	16.4	108.587	1.025
16.7692	15.6	108.587	0.975
16.7784	16.1	108.853	1.00625
16.7899	16	109.119	1
16.7991	15.3	109.385	0.95625
16.8118	15.9	109.651	0.99375
16.8222	15.6	109.651	0.975
16.8313	16.2	109.651	1.0125
16.844	15.7	109.651	0.98125
16.8544	16.1	109.119	1.00625
16.8647	15.7	108.853	0.98125
16.8763	16.3	109.651	1.01875
16.8854	16.5	110.184	1.03125
16.897	15.3	109.918	0.95625
16.9085	16.5	109.385	1.03125
16.9177	15.9	109.385	0.99375
16.9292	15.5	109.651	0.96875
16.9408	16.4	109.119	1.025
16.9499	16.2	109.651	1.0125
16.9615	16.1	109.385	1.00625
16.973	15.8	109.918	0.9875
16.9822	15.7	109.119	0.98125
16.9937	16.1	109.385	1.00625
17.0053	16.3	108.853	1.01875
17.0144	15.4	110.184	0.9625
17.0259	15.2	109.918	0.95
17.0375	16.3	109.385	1.01875
17.0466	15.7	108.853	0.98125
17.0582	15.4	108.853	0.9625
17.0697	15.1	109.651	0.94375
17.0789	16.2	109.918	1.0125
17.0916	17.1	110.184	1.06875
17.0996	15.9	109.918	0.99375
17.1123	15.4	109.918	0.9625
17.1227	16	110.184	1
17.1342	16.3	109.918	1.01875
17.1434	15.8	109.918	0.9875
17.1549	15.8	109.918	0.9875
17.1653	16.3	109.119	1.01875
17.1756	16.1	109.918	1.00625
17.1871	15.6	109.651	0.975
17.1975	15.7	109.918	0.98125
17.209	15.8	109.918	0.9875
17.2182	16.2	109.385	1.0125
17.2297	16	109.918	1
17.2413	16	109.918	1
17.2504	16.1	110.184	1.00625
17.262	16.5	108.587	1.03125
17.2735	15.8	109.119	0.9875
17.2827	15.2	109.385	0.95
17.2942	16.8	110.716	1.05
17.3057	15.3	110.716	0.95625
17.3149	15.8	109.651	0.9875
17.3265	15.9	109.385	0.99375
17.338	16.1	109.119	1.00625
17.3471	15.5	109.385	0.96875
17.3587	15.6	109.385	0.975
17.3702	15.7	109.918	0.98125
17.3794	15.9	109.918	0.99375
17.3933	15.9	109.119	0.99375
17.4025	15.3	109.385	0.95625
17.4116	15.7	109.119	0.98125
17.4244	16.3	109.385	1.01875
17.4323	15.6	110.184	0.975
17.4463	16.7	109.651	1.04375
17.4554	16.1	109.119	1.00625
17.467	15.9	108.587	0.99375
17.4761	16.5	108.853	1.03125
17.4888	15.8	109.385	0.9875
17.4992	15.3	109.918	0.95625
17.5083	15.6	109.119	0.975
17.5199	15.8	109.119	0.9875
17.5302	15.3	108.853	0.95625
17.5418	16.3	109.119	1.01875
17.5521	15.5	109.385	0.96875
17.5625	16.3	109.119	1.01875
17.574	16	109.119	1
17.5832	16.3	109.651	1.01875
17.5947	16.8	109.119	1.05
17.6063	15.9	108.853	0.99375
17.6154	15.5	109.119	0.96875
17.627	15.5	109.119	0.96875
17.6385	16.2	108.853	1.0125
17.6476	15.9	109.119	0.99375
17.6592	16.4	108.853	1.025
17.6707	16.8	109.385	1.05
17.6799	15.4	109.918	0.9625
17.6938	15.9	109.918	0.99375
17.703	15.7	109.918	0.98125
17.7121	16.9	109.385	1.05625
17.7237	15.7	109.651	0.98125
17.7352	16.4	109.651	1.025
17.7468	15.6	109.918	0.975
17.7559	15.4	109.651	0.9625
17.7675	16.5	109.385	1.03125
17.7766	16.8	109.385	1.05
17.7893	15.5	109.385	0.96875
17.7973	16.1	109.119	1.00625
17.8101	16.5	109.119	1.03125
17.8204	15.9	109.385	0.99375
17.8391	16.6	108.587	1.0375
17.8543	16.4	109.385	1.025
17.8634	16.8	109.651	1.05
17.875	15.6	109.119	0.975
17.8841	16.2	109.119	1.0125
17.8957	15.8	109.918	0.9875
17.9072	16	109.918	1
17.9164	16.2	109.918	1.0125
17.9279	16.3	109.385	1.01875
17.9395	15.6	109.119	0.975
17.9486	16.5	109.651	1.03125
17.9614	15.6	109.651	0.975
17.9717	15.9	109.918	0.99375
17.9809	15.7	109.385	0.98125
17.9924	15.4	109.385	0.9625
18.0039	16.2	109.651	1.0125
18.0131	16.3	109.918	1.01875
18.0258	15.9	109.651	0.99375
18.0362	14.9	108.853	0.93125
18.0453	16.2	109.385	1.0125
18.0581	16.2	109.918	1.0125
18.0672	15.5	109.385	0.96875
18.0788	16.1	109.119	1.00625
18.0891	14.7	109.651	0.91875
18.0995	16	109.385	1
18.111	16	109.385	1
18.1202	16.1	109.918	1.00625
18.1317	15.9	109.119	0.99375
18.1432	15.8	109.385	0.9875
18.1548	16	109.119	1
18.1639	16.4	108.853	1.025
18.1755	16.6	109.385	1.0375
18.1846	15.8	109.385	0.9875
18.1962	15.9	109.918	0.99375
18.2077	16.3	110.184	1.01875
18.2169	15.8	109.385	0.9875
18.2308	16.6	109.385	1.0375
18.24	15.8	109.651	0.9875
18.2515	15.8	109.918	0.9875
18.2607	15.8	109.385	0.9875
18.2722	15.6	109.385	0.975
18.2838	16.1	109.918	1.00625
18.2929	15.8	109.651	0.9875
18.3044	15	109.385	0.9375
18.3136	16.2	108.853	1.0125
18.3264	16.1	109.119	1.00625
18.3367	15.8	109.651	0.9875
18.3458	16.2	108.853	1.0125
18.3586	15.3	110.184	0.95625
18.3689	15.3	109.918	0.95625
18.3793	16	109.651	1
18.3896	15.6	109.651	0.975
18.4012	16	109.119	1
18.4103	16.4	109.119	1.025
18.4231	15.8	109.385	0.9875
18.4322	16.7	110.184	1.04375
18.4438	15.5	109.651	0.96875
18.4553	15.7	110.184	0.98125
18.4644	15.9	109.385	0.99375
18.476	16.5	109.651	1.03125
18.4875	16.3	109.119	1.01875
18.4967	15.8	109.119	0.9875
18.5082	15.7	108.853	0.98125
18.5198	15.8	109.651	0.9875
18.5289	16.2	109.385	1.0125
18.5405	15.2	109.119	0.95
18.552	15.1	108.587	0.94375
18.5612	16.3	109.385	1.01875
18.5727	16.5	109.119	1.03125
18.5843	15	108.853	0.9375
18.5934	16.7	108.853	1.04375
18.605	15.5	109.119	0.96875
18.6165	16.1	109.119	1.00625
18.6257	16.1	109.385	1.00625
18.6372	15.1	109.385	0.94375
18.6487	16.6	109.119	1.0375
18.6579	16.3	109.385	1.01875
18.6694	16.1	109.651	1.00625
18.681	16.2	109.385	1.0125
18.6901	16.2	109.385	1.0125
18.7017	15.5	109.651	0.96875
18.712	16.6	109.651	1.0375
18.7236	15.7	109.651	0.98125
18.7339	16.3	109.385	1.01875
18.7443	16.1	109.385	1.00625
18.7558	16.3	108.853	1.01875
18.765	16.7	109.119	1.04375
18.7765	16.3	109.918	1.01875
18.788	15.4	109.385	0.9625
18.7972	16.6	110.184	1.0375
18.8087	15.4	110.45	0.9625
18.8203	15.2	109.651	0.95
18.8294	15.8	109.385	0.9875
18.841	16	109.385	1
18.8525	16.1	109.385	1.00625
18.8617	16.7	109.119	1.04375
18.8732	15.5	108.853	0.96875
18.8848	14.8	109.651	0.925
18.8939	15.8	110.45	0.9875
18.9055	15.6	109.651	0.975
18.917	15.8	109.651	0.9875
18.9262	15.2	109.651	0.95
18.9377	15.4	109.119	0.9625
18.9492	16.2	109.651	1.0125
18.9584	15.5	109.651	0.96875
18.97	15.4	108.321	0.9625
18.9815	16	109.918	1
18.9906	15.5	109.385	0.96875
19.0034	16.6	109.119	1.0375
19.0137	15.9	108.587	0.99375
19.0229	16.3	109.119	1.01875
19.0344	15.3	109.651	0.95625
19.046	15.1	110.184	0.94375
19.0551	15.8	109.918	0.9875
19.0679	15.7	108.853	0.98125
19.077	16.5	109.651	1.03125
19.0886	15.5	109.385	0.96875
19.0989	16	108.853	1
19.1092	15.5	109.651	0.96875
19.1208	15.9	109.918	0.99375
19.13	16	109.385	1
19.1415	16	109.918	1
19.153	15.6	110.184	0.975
19.1622	15.7	109.918	0.98125
19.1737	15.7	109.119	0.98125
19.1853	15.3	108.853	0.95625
19.1944	16.3	108.587	1.01875
19.2084	16.1	108.321	1.00625
19.2151	15.4	108.853	0.9625
19.2291	15.7	109.119	0.98125
19.2382	15.8	110.716	0.9875
19.2498	15.9	109.651	0.99375
19.2613	15.6	109.918	0.975
19.2705	15.9	109.918	0.99375
19.282	15.3	109.119	0.95625
19.2911	15	109.385	0.9375
19.3039	15.9	109.651	0.99375
19.3142	15.7	109.385	0.98125
19.3234	15.4	109.385	0.9625
19.3361	16.1	109.385	1.00625
19.3441	14.9	108.853	0.93125
19.3568	16.2	109.119	1.0125
19.3672	16.9	109.918	1.05625
19.3787	15.9	109.385	0.99375
19.3891	15.1	109.385	0.94375
19.3994	15.1	109.651	0.94375
19.4098	16.2	109.385	1.0125
19.4213	15.6	109.918	0.975
19.4328	15.1	109.119	0.94375
19.442	15.5	109.119	0.96875
19.4535	16.6	109.651	1.0375
19.4627	15.4	110.184	0.9625
19.4742	15.8	110.184	0.9875
19.4858	16.3	109.918	1.01875
19.4973	15.8	109.385	0.9875
19.5065	15.1	108.853	0.94375
19.518	15.1	109.918	0.94375
19.5296	16.4	110.982	1.025
19.5387	15.5	108.853	0.96875
19.5503	15.8	109.119	0.9875
19.5618	14.9	108.853	0.93125
19.571	15.7	108.853	0.98125
19.5825	15.8	108.853	0.9875
19.594	15.8	109.651	0.9875
19.6032	15.9	109.385	0.99375
19.6148	15.6	109.119	0.975
19.6263	15.6	109.651	0.975
19.6354	16.1	109.385	1.00625
19.647	15.2	108.587	0.95
19.6585	16.1	108.853	1.00625
19.6677	16.1	108.587	1.00625
19.6804	16	109.651	1
19.6884	15	109.119	0.9375
19.7011	16.2	108.853	1.0125
19.7115	15.2	109.651	0.95
19.7218	16.1	109.918	1.00625
19.7334	16	109.918	1
19.7437	15.5	109.385	0.96875
19.754	15.5	109.119	0.96875
19.7656	16.5	109.119	1.03125
19.7748	15.4	109.385	0.9625
19.7863	15.5	109.651	0.96875
19.7978	15	110.716	0.9375
19.807	15.5	110.184	0.96875
19.8185	16.1	110.184	1.00625
19.8301	15.8	109.918	0.9875
19.8392	15.3	109.651	0.95625
19.8508	16	109.385	1
19.8623	14.5	109.918	0.90625
19.8715	16.3	109.918	1.01875
19.883	15.8	108.587	0.9875
19.8946	14.9	109.651	0.93125
19.9037	16.1	109.918	1.00625
19.9153	15.8	110.184	0.9875
19.9268	15.8	110.45	0.9875
19.9359	15.4	109.918	0.9625
19.9487	16.1	109.119	1.00625
19.9566	14.8	109.385	0.925
19.9706	15.7	109.651	0.98125
19.9797	16.1	109.651	1.00625
19.9913	15.9	109.651	0.99375
20.0004	16	108.853	1
20.0168	15.8	108.853	0.9875
20.0319	15	109.651	0.9375
20.0423	16.3	109.651	1.01875
20.0538	15.5	109.651	0.96875
20.063	16.3	109.651	1.01875
20.0757	15.2	109.119	0.95
20.0849	16.1	109.385	1.00625
20.0964	15.8	109.119	0.9875
20.1068	15.1	109.651	0.94375
20.1171	15.2	109.385	0.95
20.1286	15.4	109.651	0.9625
20.1378	16.3	109.385	1.01875
20.1493	15.5	109.651	0.96875
20.1609	15.7	108.853	0.98125
20.17	15	109.651	0.9375
20.1816	17	110.184	1.0625
20.1931	15.7	110.184	0.98125
20.2023	16	109.651	1
20.2162	16	109.918	1
20.223	15.9	109.651	0.99375
20.2369	15.9	109.651	0.99375
20.2461	15.4	109.119	0.9625
20.2576	15.8	109.918	0.9875
20.2691	16.2	110.184	1.0125
20.2783	15.2	109.651	0.95
20.2899	15.3	109.385	0.95625
20.299	15.6	109.119	0.975
20.3117	15.9	109.651	0.99375
20.3197	15.3	109.119	0.95625
20.3336	16.2	109.651	1.0125
20.3428	15.8	109.918	0.9875
20.3543	15.9	109.651	0.99375
20.3647	15.3	109.119	0.95625
20.375	14.9	110.184	0.93125
20.3866	15.3	109.918	0.95625
20.3957	16.5	109.119	1.03125
20.4085	16.3	109.651	1.01875
20.4176	15.9	109.385	0.99375
20.4291	16.3	109.385	1.01875
20.4407	16	109.651	1
20.4498	15.7	109.918	0.98125
20.4614	15.8	109.385	0.9875
20.4705	15.3	109.385	0.95625
20.4845	16.4	109.918	1.025
20.4924	14.8	109.918	0.925
20.5052	16	109.918	1
20.5143	15.6	109.119	0.975
20.5259	15.2	109.119	0.95
20.5374	15.8	109.651	0.9875
20.5466	16	109.918	1
20.5581	16.1	110.45	1.00625
20.5697	15.8	109.119	0.9875
20.5788	15.4	109.119	0.9625
20.5904	15	110.184	0.9375
20.6019	16.3	109.651	1.01875
20.611	16.3	110.184	1.01875
20.6226	15.1	110.184	0.94375
20.6341	16	109.651	1
20.6433	16.3	109.651	1.01875
20.6548	15.4	109.385	0.9625
20.6664	15.9	109.119	0.99375
20.6755	15.7	109.119	0.98125
20.6871	16	109.651	1
20.6986	15.9	108.853	0.99375
20.7078	15.8	109.385	0.9875
20.7193	16.4	109.119	1.025
20.7297	15.7	108.853	0.98125
20.7412	16	109.651	1
20.7516	15.5	109.385	0.96875
20.7619	15.4	109.385	0.9625
20.7734	15.3	109.918	0.95625
20.7826	15.3	108.853	0.95625
20.7941	15.2	109.119	0.95
20.8057	15.6	109.119	0.975
20.8148	16.2	109.119	1.0125
20.8264	15.4	109.651	0.9625
20.8379	15	109.385	0.9375
20.8471	15.8	109.651	0.9875
20.8586	15.8	109.119	0.9875
20.8702	15.5	109.119	0.96875
20.8793	16.2	109.385	1.0125
20.8909	15.2	110.184	0.95
20.9024	15.3	109.385	0.95625
20.9115	16.2	109.385	1.0125
20.9231	16.1	108.853	1.00625
20.9347	16	109.385	1
20.9438	15.7	109.119	0.98125
20.9553	15.5	109.651	0.96875
20.9669	15.7	109.119	0.98125
20.976	15.5	109.119	0.96875
20.9888	15.5	109.385	0.96875
20.9967	15.4	109.385	0.9625
21.0095	16.3	108.853	1.01875
21.0198	15.3	109.119	0.95625
21.0314	14.8	109.119	0.925
21.0405	16.1	109.385	1.00625
21.0533	15.7	108.587	0.98125
21.0612	17	109.651	1.0625
21.0739	15.4	109.651	0.9625
21.0843	15.1	109.918	0.94375
21.0946	15.9	110.184	0.99375
21.1062	16.2	109.651	1.0125
21.1153	16.1	109.385	1.00625
21.1269	15.6	109.651	0.975
21.1384	15.4	109.918	0.9625
21.1476	15.6	109.385	0.975
21.1591	16.2	109.119	1.0125
21.1707	15.7	109.385	0.98125
21.1798	15.5	109.651	0.96875
21.1938	15.8	109.651	0.9875
21.2005	15.7	110.184	0.98125
21.2145	15.7	109.651	0.98125
21.2236	15.3	109.385	0.95625
21.2352	16	110.184	1
21.2443	15.2	109.651	0.95
21.2583	15.1	109.385	0.94375
21.2674	15.9	108.853	0.99375
21.2765	15.8	108.853	0.9875
21.2881	16	109.385	1
21.2996	16.8	109.385	1.05
21.3088	15.6	108.853	0.975
21.3203	16.4	109.119	1.025
21.3319	15.3	109.385	0.95625
21.341	15.3	109.119	0.95625
21.3538	15.9	109.651	0.99375
21.3641	15.6	109.651	0.975
21.3733	15.3	109.651	0.95625
21.386	15.4	108.853	0.9625
21.3964	15	109.651	0.9375
21.4055	16.3	109.918	1.01875
21.4182	15.3	109.385	0.95625
21.4274	15.1	109.119	0.94375
21.4389	16.6	109.119	1.0375
21.4505	16.9	109.119	1.05625
21.4596	15.6	109.918	0.975
21.4712	16.2	110.45	1.0125
21.4803	16	110.184	1
21.4943	16.1	110.184	1.00625
21.5022	16	110.45	1
21.515	15.4	110.45	0.9625
21.5241	15.4	109.119	0.9625
21.5357	15.1	108.853	0.94375
21.5472	15.8	110.184	0.9875
21.5563	15.8	109.119	0.9875
[truncated: 14,677 more rows]
[truncated: 61 more columns]

## Sheet: Figure 3C
	5.6 mM glucose TS
	control		pacing 1 Hz		pacing 2 Hz		pacing 5 Hz
	3.715		1.20454		4.33249		0
	4.40714		1.09362		0.869828		0
	0.488103		0.999635		0.973151		2.14453
	0		0		0.58743		0
	0.415954		3.52776		0.600204		0.736535
	1.83891		0.589541		0.476048		0.621383
	3.44193		0.405892		0.462919		1.64197
	0		0.506817		0		1.36067
	10.8502		0		0.56756
	10.5489		1.80458		0.572657
	0.834934		1.63736
	7.50077		0.911734
	2.12334		2.34578
	1.0329		0
	0		0
	2.20317		1.35013
	0		0.569691
	0		3.52424
	2.0929		0.577685
	1.78559		1.55744
	1.50136		1.1255
	4.65351		1.80631
	2.72554		0
	5.27175
	1.4136
	0
	2.95735
Average	2.65937		1.11036		0.944228		0.813136
N	27		23		10		8
SEM	0.574569		0.211487		0.385208		0.29233
TTEST			0.0163916		0.0181986		0.00722211

## Sheet: Figure 3B
	control		1 Hz pacing		2 Hz pacing		5 Hz pacing
	29.1318		12.3058		11.9122		6.57688
	38.5362		38.4796		25.9587		14.736
	37.7313		42.1312		12.3957		7.66644
	27.2755		16.7308		6.01515		8.57577
	48.9125		30.663		13.5796		9.49164
	50.9696		31.0153		2.63255		1.10865
	24.1698		14.9715		28.3528		17.4664
	39.4509		33.6351		13.2572		0
	22.9365		31.3455		17.4985		5.53275
	48.3893		22.7519		0.772437		9.5647
	48.4326		38.8938		6.77841		0.891273
	50.6371		3.0151		2.5245		5.84472
	28.8454		5.12352				13.4407
			5.7307
			5.39495
			3.50876
			20.2134
Average	38.1091		20.9359		11.8065		7.76123
SEM	2.95449		3.3346		2.55687		1.48442
N	13		17		12		13
TTEST			0.000619981		7.62918e-07		3.80391e-08

## Sheet: Figure 3D
luciferin luminenscence
Description		60-110s 1Hz		120-170s 2Hz		180-230s 5Hz
Region			1	2	3	4	5	6	7	8	9	10	11	12	13	14	15	16	17	18	19	20	21	22	23	24	25	26	27	28	29	30	31	32	33	34	35	36	37

Area (um*um)			637.44	714.24	706.56	450.56	555.52	627.2	596.48	614.4	640	465.92	494.08	499.2	642.56	573.44	522.24	522.24	604.16	540.16	335.36	478.72	517.12	345.6	401.92	476.16	450.56	404.48	476.16	724.48	537.6	604.16	468.48	417.28	473.6	783.36	614.4	422.4	376.32		Average	0.0056
Frame		Time (s)	Mean Intensity	Mean Intensity	Mean Intensity	Mean Intensity	Mean Intensity	Mean Intensity	Mean Intensity	Mean Intensity	Mean Intensity	Mean Intensity	Mean Intensity	Mean Intensity	Mean Intensity	Mean Intensity	Mean Intensity	Mean Intensity	Mean Intensity	Mean Intensity	Mean Intensity	Mean Intensity	Mean Intensity	Mean Intensity	Mean Intensity	Mean Intensity	Mean Intensity	Mean Intensity	Mean Intensity	Mean Intensity	Mean Intensity	Mean Intensity	Mean Intensity	Mean Intensity	Mean Intensity	Mean Intensity	Mean Intensity	Mean Intensity	Mean Intensity			Lucifercin luminenscence
0		0	4.251	5.6906	7.9727	5.6967	6.0317	4.6562	4.1967	6.5446	4.3093	5.8684	8.2257	7.0455	6.4792	5.8905	5.3244	5.4812	3.9655	6.8468	7.7574	5.6752	7.6258	7.6056	4.3898	5.4956	5.5317	4.0589	5.5348	6.0011	7.1648	4.6603	4.6528	7.2847	7.3464	5.3816	4.2089	4.4736	4.1666		5.77006	57.7006	5.77006	5.77006
1		2	3.9136	4.95	7.4536	5.0875	5.3001	5.352	4.0795	5.711	4.6812	5.4186	7.3238	6.0397	5.8489	4.4059	5.6057	5.1017	3.2762	6.0878	7.0281	5.9077	6.7341	7.0581	6.2844	4.5453	4.6534	5.2573	4.4536	5.7505	5.7806	5.0658	4.5017	7.6172	6.3427	4.7967	4.1356	3.3713	4.6974		5.39509	54.0069	5.40069	5.40069
2		4	4.2663	5.1042	7.0165	5.4237	6.3782	4.7666	4.1784	6.4716	3.8468	5.6227	8.6098	6.6991	4.6377	4.9228	4.9746	5.0494	3.1693	5.9725	6.4921	6.9616	7.4688	6.6627	6.1797	4.9944	5.4138	4.2965	5.073	6.0982	5.7646	4.8149	4.344	7.5963	6.6389	5.7416	3.5909	3.7202	4.5976		5.50162	55.1282	5.51282	5.51282
3		6	3.5592	4.8689	7.1739	5.1788	5.3596	5.1495	4.1882	6.7734	3.9705	5.052	8.0717	6.6084	5.2822	4.3976	4.9386	5.5512	3.257	6.077	6.0908	7.12	6.4656	7.3384	5.1891	5.4014	5.1674	4.0487	4.6089	5.9491	7.0479	4.6476	3.9228	7.382	5.6512	5.1183	4.3509	4.4429	4.7027		5.4082	54.25	5.425	5.425
4		8	3.6604	4.5761	6.7324	5.901	5.4875	5.327	3.9527	6.3453	3.9574	5.4173	7.3518	7.2969	6.052	5.5461	5.4214	5.4678	3.1254	6.2064	7.5044	5.6195	6.8801	8.0394	5.0501	4.7858	5.6947	3.8387	5.2822	5.6765	7.0485	4.9939	3.9848	6.5304	6.2453	5.6862	4.6046	3.9738	4.7706		5.51444	55.3684	5.53684	5.53684
5		10	3.7171	4.6821	7.5637	5.6351	5.9967	5.012	3.9239	6.0367	4.5277	6.1224	7.2668	6.7622	5.8509	4.8944	5.5014	5.5514	3.4195	5.8913	7.912	6.7853	6.9922	7.3464	5.3543	4.7085	6.7163	4.6961	5.091	5.6192	5.4013	5.4352	4.5709	7.4495	6.7088	4.7438	4.2872	4.3194	5.6752		5.62616	56.5416	5.65416	5.65416
6		12	4.3596	4.6868	7.2015	5.7341	5.7577	5.6651	3.4023	5.8504	3.6789	5.9424	8.332	6.5988	6.0006	5.5113	4.8389	4.762	3.5343	6.3601	7.2164	6.1226	7.1549	7.7273	4.6059	5.0846	4.9193	4.1042	5.2867	6.2617	7.5118	5.2366	4.3537	7.1232	6.33	4.9667	4.2568	3.7194	4.0627		5.52058	55.5418	5.55418	5.55418
7		14	3.6664	4.6968	7.1325	5.5453	5.1232	5.191	4.3785	6.5293	4.2748	5.8289	7.5389	6.6648	6.0176	5.4692	5.8687	5.7068	3.2987	5.387	7.3771	5.8816	7.3682	6.3422	5.9711	4.7037	5.224	4.029	4.9646	5.7642	6.4666	4.8124	4.1376	6.5509	8.0592	5.958	4.236	4.5515	4.6854		5.5514	55.906	5.5906	5.5906
8		16	3.3446	5.1913	6.578	6.1801	5.4527	4.3369	4.1103	6.076	5.04	5.6832	7.1919	6.8708	4.8155	5.187	5.647	5.3326	3.3009	5.1254	6.5207	6.2358	7.149	6.7064	4.9781	4.5301	5.1961	4.0137	5.0234	6.2257	6.3559	5.0428	4.6555	6.3841	6.6165	5.8431	4.0958	3.5768	4.677		5.38624	54.3104	5.43104	5.43104
9		18	3.6977	4.9959	7.1826	5.9178	5.2099	5.0876	3.556	5.9914	3.6077	5.7143	7.392	6.6368	5.4861	4.5167	5.4706	5.6703	3.6795	6.1922	6.8499	6.2221	6.9114	7.0705	5.0804	4.7282	4.8971	3.9325	4.8328	5.5314	6.8139	4.1753	4.4222	6.9933	7.1366	5.0414	4.1637	3.8109	5.0276		5.39585	54.4625	5.44625	5.44625
10		20	4.3669	4.6296	7.3004	5.1114	5.5464	5.5301	4.1446	5.9164	3.9028	6.4326	7.7893	7.1028	5.4379	4.8554	4.8401	4.9187	3.4605	5.9427	7.2738	6.0281	7.1781	8.575	5.3712	5.0367	5.4125	3.8289	5.5792	6.4181	6.1388	5.1648	4.6814	7.5196	7.1691	4.944	4.468	3.7377	5.1407		5.59174	56.4774	5.64774	5.64774
11		22	3.9746	4.8945	6.73	5.322	5.3125	4.155	4.0452	6.1514	4.2583	5.5735	8.223	6.9074	5.2791	5.4817	5.0574	4.9822	3.5838	5.5942	7.1116	5.6694	6.9754	5.7589	5.3278	4.3427	5.7097	4.3871	5.1353	6.5803	6.4705	4.7835	4.8052	7.3713	6.2199	5.1593	3.8338	4.1474	4.2301		5.39311	54.5471	5.45471	5.45471
12		24	3.5948	4.8491	6.6615	6.6109	4.5424	5.2161	3.829	6.1487	4.031	5.9916	7.4559	6.1124	4.853	5.128	5.6275	4.8786	4.0043	6.1885	7.3793	5.9123	7.0911	6.8726	4.9831	3.8343	4.9095	3.4019	5.3209	6.0625	6.7528	4.7348	4.3059	6.6993	6.2983	4.7232	4.3398	3.683	5.5452		5.36684	54.3404	5.43404	5.43404
13		26	4.103	4.8582	7.6132	6.3779	4.9176	4.7344	3.6872	6.289	3.6586	5.3694	8.0505	6.1997	5.2387	5.0074	4.6036	5.2524	3.4211	6.1036	7.3247	5.7746	6.7647	7.0456	5.3682	4.381	5.2379	4.3371	4.9611	6.0188	6.2118	4.43	3.9829	6.1587	6.556	5.4482	4.3668	3.6533	5.097		5.36767	54.4047	5.44047	5.44047
14		28	4.3553	5.3679	7.5232	6.715	5.5172	5.211	4.8018	6.2034	4.1262	5.511	7.5556	6.9825	5.2527	5.223	5.1517	5.5745	3.451	6.1241	6.9652	6.2079	6.7429	7.2581	5.1307	4.4486	4.2661	4.2603	5.8615	5.908	7.0453	4.9313	4.3239	6.0999	6.5334	5.4778	4.0756	3.2936	5.2014		5.53185	56.1025	5.61025	5.61025
15		30	4.0612	5.4391	7.0536	5.1924	5.5823	4.9897	3.4483	7.1876	3.918	5.2948	7.7239	7.4935	5.3212	4.7376	5.5079	5.1967	3.297	5.6197	7.6396	5.9757	7.1256	6.6639	5.1018	4.5154	5.34	3.6248	4.7267	6.3586	5.7558	4.7792	4.9737	7.6883	6.6269	4.9356	4.36	3.4807	4.5287		5.43961	55.2361	5.52361	5.52361
16		32	3.8231	5.0089	7.22	5.7749	5.3074	5.1323	3.5308	6.443	4.5034	5.6663	7.323	6.8642	4.3257	4.7908	5.0833	5.7986	2.4262	6.4536	7.2126	5.6879	6.381	6.3204	5.5942	4.4872	5.0113	4.2295	4.9744	5.9238	6.6176	4.5787	4.4203	6.7405	6.623	4.8642	4.5475	4.6454	4.7145		5.37972	54.6932	5.46932	5.46932
17		34	4.5539	5.2665	7.1668	6.066	5.7021	4.9304	4.312	6.1493	3.6789	4.3062	7.5526	6.5325	5.8906	4.6243	5.7538	5.0875	3.237	6.0213	7.4787	6.4436	6.4131	5.6194	5.0331	4.4255	5.0777	3.9095	4.9261	6.1077	6.7009	4.7528	4.7925	6.2699	6.737	5.1839	4.1436	3.6458	4.3037		5.37287	54.6807	5.46807	5.46807
18		36	4.1243	5.1592	7.3966	6.2711	5.6575	5.398	3.7457	6.3811	3.9692	5.4307	7.7314	7.2133	5.7583	5.1477	5.0166	5.2161	3.1957	5.3817	6.6665	6.3011	7.7568	7.5381	5.7689	3.6847	4.6395	4.715	5.2211	6.2366	6.9643	5.3953	4.9265	7.1256	7.2872	6.0973	4.2446	3.8117	3.715		5.57541	56.7621	5.67621	5.67621
19		38	3.4564	5.3274	6.1554	5.2488	5.6043	4.891	3.9531	6.3107	3.8339	5.3036	7.5905	6.8949	5.4959	4.2805	5.2801	4.9841	3.2444	4.9088	7.6766	5.2514	6.3847	6.4858	3.9471	4.1115	5.5298	4.6773	4.2715	5.6458	6.8879	4.1786	4.7144	5.6406	6.5344	4.6829	3.9884	3.3092	5.0264		5.1813	52.877	5.2877	5.2877
20		40	3.8109	4.3343	7.0046	6.3195	4.9041	5.0922	3.8475	6.0251	3.6167	4.7211	7.6138	6.6347	5.4299	4.5251	5.2356	5.5661	3.0724	6.4593	7.1733	6.157	6.7965	6.6221	5.0418	4.2632	5.7448	4.0414	4.3538	6.1105	5.8649	5.0565	3.7984	7.1294	5.9147	5.2683	4.0181	3.9791	3.9057		5.2825	53.945	5.3945	5.3945
21		42	3.2276	5.43	7.1108	6.0888	5.5763	5.577	3.5336	5.1272	3.5912	5.3362	7.8374	6.4621	5.3841	4.4407	5.852	5.7622	3.7449	5.9078	6.6895	6.181	6.8914	6.6488	4.9774	4.1542	4.7232	4.162	5.0349	5.9883	6.9193	4.5854	4.3249	5.7782	6.52	5.364	4.4747	3.1735	5.1785		5.34484	54.6244	5.46244	5.46244
22		44	3.8966	4.5308	7.6369	4.9275	5.6153	4.7177	4.0361	6.348	3.9762	4.6153	8.3245	6.5101	4.9276	4.5049	5.4775	5.2546	2.886	6.4968	6.3699	5.5127	7.7261	7.7924	4.9623	4.372	4.406	4.8796	4.5228	6.1438	6.3125	5.244	3.8469	7.2249	5.4975	6.1523	4.2261	3.945	4.5029		5.36006	54.8326	5.48326	5.48326
23		46	3.8047	4.9894	6.8072	6.6167	5.009	5.0838	3.8658	6.3469	4.4745	4.8416	7.2599	7.054	5.3028	4.6932	4.8538	4.7194	3.1535	5.8806	7.2173	6.0862	6.9289	7.2853	4.7418	4.2265	4.9842	4.0292	4.3852	5.6553	6.3642	4.6414	4.1258	7.0263	7.0473	5.3528	3.9967	3.406	4.4031		5.31514	54.4394	5.44394	5.44394
24		48	4.1099	4.6911	6.9102	5.1565	5.2717	5.5408	3.4243	5.3191	3.7815	4.4969	7.1641	6.6717	4.6306	4.2793	5.3224	5.1473	2.8748	5.6496	6.5215	5.4201	6.8058	5.7705	5.2626	4.4309	4.7974	4.0546	4.5847	5.4485	5.9832	4.2385	3.8898	6.4542	6.5495	5.0772	3.8232	3.3189	4.1204		5.05387	51.8827	5.18827	5.18827
25		50	3.4514	4.5484	6.8436	5.7729	5.5978	4.6986	3.639	6.0621	4.3423	4.3592	7.9019	7.199	5.3605	4.2793	5.2278	5.5615	2.7674	5.3865	8.0738	6.3977	6.872	7.615	4.5017	4.321	4.4831	3.6957	5.3389	5.9677	6.967	4.9187	4.3663	7.1771	6.1281	5.0848	3.9784	3.1278	4.4831		5.31073	54.5073	5.45073	5.45073
26		52	3.4962	5.1228	6.6277	6.3423	5.8824	4.9223	3.5437	5.6159	3.938	4.7707	7.837	6.5363	5.2346	4.5497	4.6552	4.4251	2.6683	6.6284	6.6683	5.9155	6.6411	6.6034	4.901	3.7411	5.2062	3.8204	4.6063	5.8277	6.4649	4.3817	3.7314	6.947	6.3578	5.062	3.8564	3.5759	4.2049		5.17053	53.1613	5.31613	5.31613
27		54	3.903	4.4907	7.3487	5.4855	5.7516	5.0478	3.7955	5.8899	3.7633	4.6398	7.1627	6.2773	4.7638	4.9341	5.1517	5.3812	3.2509	5.6782	6.0936	6.2609	7.0134	6.7163	5.0791	4.4618	4.8232	4.2414	5.0657	5.7772	6.7889	4.2673	3.7324	7.2228	6.4922	5.3089	3.923	4.0303	4.196		5.24892	54.0012	5.40012	5.40012
28		56	3.6489	5.5454	7.0739	4.4465	5.6365	5.2489	3.1622	5.7454	3.5727	4.5887	8.5087	6.1019	4.9275	4.7598	5.5269	5.161	2.9065	5.971	7.2397	5.8207	6.7842	6.5682	5.3711	4.1823	5.711	4.3711	4.2513	5.8604	6.4569	4.3587	3.854	6.5629	5.8768	5.324	3.9033	3.6226	4.761		5.22737	53.8417	5.38417	5.38417
29		58	3.1506	4.6972	7.0902	5.7696	4.998	5.2308	4.3686	5.7076	4.3967	4.6239	6.6757	6.8496	4.7149	5.3231	5.2183	5.8266	2.8692	5.5333	7.5097	5.8802	6.9494	7.7289	5.365	3.6144	4.3156	3.7785	4.9485	5.6756	6.2243	3.9293	3.3303	6.0541	5.3958	4.9936	4.6309	3.584	4.7619		5.18146	53.4386	5.34386	5.34386
30		60	4.4083	4.9814	7.6171	5.6348	5.4497	5.1994	3.6655	5.5635	4.0971	5.5704	7.2655	7.0302	4.9248	4.5669	5.0368	5.1321	3.0856	6.0405	7.2986	5.8874	6.8837	6.3455	5.0946	3.9747	4.5098	3.908	5.2154	5.2563	6.1811	5.0241	4.4497	6.7513	6.2091	4.7307	3.697	3.5609	4.5536		5.26489	54.3289	5.43289	5.43289
31		62	3.4833	4.7219	8.0414	5.4106	4.6559	5.1403	3.5722	6.2475	3.9655	4.9412	8.0641	6.4428	5.4676	4.2559	4.9917	4.4476	3.5988	6.1628	7.4673	4.5578	7.3087	6.7869	4.5302	4.2543	5.28	3.9382	5.2167	6.3832	6.0254	4.3489	3.7938	6.4557	6.0395	5.0178	4.5974	3.3954	4.5526		5.23138	54.0498	5.40498	5.40498
32		64	3.1642	4.5552	6.8988	5.9747	6.0221	5.1001	3.2885	5.8907	3.5609	4.5546	7.3423	6.2317	5.6328	4.4892	4.7827	4.9466	2.8332	6.197	7.5184	6.1031	7.0862	7.1945	4.7925	5.2647	4.9586	4.0013	4.3361	5.4753	5.5241	4.4256	3.5808	7.5435	5.8293	4.9037	4.356	3.4429	4.4821		5.19686	53.7606	5.37606	5.37606		120
33		66	3.4997	4.5923	7.1977	4.8106	5.028	5.7304	4.7923	5.8225	4.383	5.1832	7.825	6.7618	5.3697	4.9598	5.0013	5.0478	3.2133	6.7835	6.9648	6.0016	7.3186	6.2665	4.9097	4.6907	4.9365	4.7141	4.3703	6.0728	5.7481	4.8513	3.9781	6.8198	6.1426	4.7873	3.7645	3.8382	4.6635		5.32002	55.0482	5.50482	5.50482		170
34		68	3.3847	4.8871	7.3227	5.1691	5.0169	5.1217	3.3191	6.41	4.1524	5.0871	7.0504	6.6428	5.7713	4.7811	5.2047	5.2437	2.7964	5.9723	6.9418	5.4818	6.2915	7.4462	4.9494	4.3452	4.1958	3.9747	5.4378	6.8193	5.9087	4.0124	3.847	6.66	6.3869	5.5265	4.0469	3.9041	4.6083		5.24643	54.3683	5.43683	5.43683
35		70	3.5742	4.7973	7.0965	5.1681	4.7048	5.1973	3.7253	5.7681	4.3168	4.9326	7.6837	6.636	5.3674	4.71	5.6119	5.0339	2.7451	5.8384	6.4833	5.673	6.7471	6.3802	5.6401	4.3265	4.5151	3.5848	4.2347	5.6591	6.5902	4.7758	3.5168	6.1138	5.9713	5.2281	3.8043	3.3969	4.0013		5.12297	53.1897	5.31897	5.31897
36		72	3.2375	5.3303	6.374	5.6842	4.9527	5.4993	3.7566	4.8049	3.4443	5.6627	7.6745	6.6914	4.8451	5.2409	5.434	4.1606	3.3541	5.5352	8.0059	6.0627	6.1829	6.3915	5.3817	4.2173	5.1896	3.9859	4.7977	6.146	6.4989	4.1401	3.8546	7.2158	6.1324	5.27	4.0753	4.2782	4.3015		5.23812	54.3972	5.43972	5.43972
37		74	3.5988	4.7782	6.1019	6.0148	4.8319	4.7181	3.479	5.9123	3.6768	4.3582	7.185	6.8279	5.0911	4.8703	5.2248	4.5687	3.4539	6.5922	7.0784	5.7417	6.5975	5.6452	5.3085	3.8706	4.9424	4.1024	4.1758	6.4669	5.5644	4.4277	3.9619	6.7266	6.2988	4.8841	3.6314	3.7203	5.2734		5.12708	53.3428	5.33428	5.33428
38		76	3.6555	4.9573	6.8535	5.3989	5.8305	5.0976	4.2161	7.158	3.6403	4.5487	7.469	6.5315	5.0894	5.2271	5.2926	5.448	3.0125	6.3767	7.3301	7.1827	7.0781	6.206	5.358	4.1365	4.0958	3.6201	4.9602	6.2755	6.6687	4.796	3.5592	5.6398	6.0615	5.1688	4.4762	3.8855	4.8076		5.32728	55.4008	5.54008	5.54008
39		78	3.5939	5.0703	6.5067	5.6017	4.5668	5.0531	3.9209	6.326	3.5753	4.9734	6.9442	6.1632	5.4458	4.1856	4.927	4.8843	2.96	6.8177	6.9856	6.115	6.3447	6.7207	4.6906	4.7152	4.7337	3.7218	3.9657	5.5576	6.1201	4.9227	3.7359	6.5501	5.9165	5.1034	4.1536	3.5968	5.4953		5.153	53.714	5.3714	5.3714
40		80	2.8485	4.6339	6.7615	5.0587	4.1966	4.8004	3.8808	5.7077	4.4729	4.5194	7.0792	6.3053	4.9598	4.7616	4.7054	4.5581	3.0094	5.9477	6.5436	5.9189	5.4234	6.3242	5.2231	3.8916	3.976	3.9099	5.234	6.42	6.1403	4.5531	4.4329	6.6581	5.9393	5.1731	3.7418	3.9634	3.5886		5.00709	52.3109	5.23109	5.23109
41		82	3.258	5.2306	6.7403	5.0257	5.8569	5.3382	3.168	6.4607	4.0121	5.0974	7.6356	6.6937	5.1375	5.2062	5.2887	4.4387	2.669	6.1122	7.1178	5.9383	5.8185	7.1514	4.5483	5.0343	4.6381	3.9838	5.4984	5.3279	6.0457	4.527	4.3382	6.3741	5.923	5.2818	4.1048	4.5972	5.0569		5.26149	54.9109	5.49109	5.49109
42		84	3.4834	5.2949	7.3703	4.8644	4.8607	4.9684	3.7245	6.3113	3.5852	4.1194	7.2875	6.5722	5.0019	4.6526	5.3607	4.8776	3.5593	6.3797	7.4528	6.0226	6.4056	5.9447	4.9494	4.6009	5.3802	4.3928	5.3088	5.1533	6.1644	4.5083	4.276	7.3049	5.3835	5.2976	3.6639	4.0392	5.0483		5.23165	54.6685	5.46685	5.46685
43		86	3.4834	5.2949	7.3703	4.8644	4.8607	4.9684	3.7245	6.3113	3.5852	4.1194	7.2875	6.5722	5.0019	4.6526	5.3607	4.8776	3.5593	6.3797	7.4528	6.0226	6.4056	5.9447	4.9494	4.6009	5.3802	4.3928	5.3088	5.1533	6.1644	4.5083	4.276	7.3049	5.3835	5.2976	3.6639	4.0392	5.0483		5.23165	54.7245	5.47245	5.47245
44		88	3.8477	4.9252	6.84	5.3299	5.4544	5.3122	3.9006	6.3334	4.5692	4.4467	7.2756	6.5424	5.1406	4.5849	4.8634	4.6425	3.1528	5.9696	7.0256	5.7166	6.2167	7.3242	4.7906	4.7436	4.991	3.4572	4.1354	5.8522	6.1292	4.8059	3.8901	5.9596	6.1132	5.1802	3.7032	3.1398	5.1213		5.17369	54.2009	5.42009	5.42009
45		90	3.4205	4.8595	6.7644	5.6852	4.1918	4.3464	3.6335	5.4282	4.2628	4.8059	7.9477	7.0464	5.115	4.4707	4.7692	5.2108	3.512	5.7577	6.7015	6.034	7.6898	6.8894	4.2561	4.5134	4.6155	3.3742	4.6579	5.6499	5.9042	4.7926	4.1023	6.4669	6.2304	5.0537	3.7685	3.1106	4.2723		5.11651	53.6851	5.36851	5.36851
46		92	3.6226	5.2693	7.4489	5.0645	4.5564	4.1879	2.7992	6.0421	3.0824	5.0917	8.1773	6.7694	5.6127	4.5136	4.8718	5.1106	3.2422	5.9499	7.6479	5.8847	7.9572	5.6467	5.0941	4.7871	4.4086	3.7052	4.8947	5.42	6.7151	4.5462	3.6083	6.5229	5.8222	5.0011	3.484	3.762	4.7735		5.1647	54.223	5.4223	5.4223
47		94	3.9298	4.3504	7.2584	5.8299	4.7584	5.3245	3.7863	6.1529	3.1835	4.7474	7.8695	6.9311	4.7257	4.522	4.503	5.2431	3.22	5.5383	7.2427	5.9249	7.1775	7.2799	4.2834	4.3763	5.4128	4.1104	4.8207	6.63	6.1883	4.2184	3.7674	6.8773	5.8144	5.6803	4.1202	3.6635	5.3661		5.26564	55.2884	5.52884	5.52884
48		96	3.5436	5.7011	7.1338	5.8504	4.8695	5.1665	3.4945	5.5765	3.5823	5.5097	8.4124	6.4787	5.3556	5.1117	5.6852	5.0681	3.8174	5.2154	7.4382	5.9406	7.5991	6.087	5.3884	4.9343	5.2121	4.0307	4.163	6.4612	5.9953	4.9332	3.8202	6.5665	6.8865	5.1574	3.9366	3.3715	4.5161		5.35163	56.2043	5.62043	5.62043
49		98	3.172	4.8747	6.4374	5.5492	4.1992	5.4467	2.9292	6.3636	3.5943	5.8191	7.5743	6.8326	5.1502	4.6577	5.4688	4.938	2.9707	6.7407	6.2524	6.8442	6.5693	6.5745	4.729	4.8624	4.4853	4.5074	4.3712	6.1939	6.8473	4.6327	3.3294	6.7998	6.7806	5.2382	4.1821	3.7942	4.0068		5.23565	55.1005	5.51005	5.51005
50		100	3.5663	4.7463	6.9997	5.8497	4.2106	5.2741	3.0895	6.3205	3.4834	5.3648	8.051	7.0162	5.2344	4.5965	6.1493	5.4808	3.2187	6.3722	7.4676	5.5829	6.1409	6.9757	4.8938	4.5671	4.6255	4.2387	5.0861	5.9542	5.5865	5.1926	3.6491	7.011	6.1244	5.4863	3.6173	3.5013	5.007		5.29005	55.7005	5.57005	5.57005
51		102	2.943	4.8649	6.5311	5.0081	4.6732	4.6353	3.3163	6.2232	3.7182	5.2331	7.1932	6.7305	4.8877	4.9955	4.9576	5.1479	3.0789	5.6316	6.4221	6.154	6.5616	7.2191	4.6747	3.6856	4.6331	4.4691	4.8312	6.1104	6.2497	4.04	4.2134	6.5798	5.5467	5.2126	4.1807	3.5213	4.9952		5.10999	53.9559	5.39559	5.39559
52		104	3.2722	4.5843	7.3861	5.2944	5.0188	5.445	3.7802	6.5745	3.9053	4.2886	7.0498	6.8326	4.0673	4.0462	5.7993	4.8323	2.3582	5.6922	6.8297	6.3433	6.4309	6.7184	5.0516	4.1019	4.2229	3.566	4.2893	5.6113	7.2125	5.3845	3.9234	7.4317	5.8484	5.4205	3.6836	3.2258	4.139		5.126	54.172	5.4172	5.4172
53		106	3.3522	4.1829	7.11	4.9036	5.0698	4.4707	3.003	5.4738	3.1684	4.7797	7.3781	7.0609	4.5699	4.7351	5.1963	4.7072	2.9276	6.2961	6.3381	6.0323	6.2743	6.3883	4.2015	4.0103	4.8878	3.8436	4.208	5.1662	5.6832	4.7099	3.3516	7.9309	5.8226	4.8286	3.385	3.1277	5.1019		4.96425	52.6105	5.26105	5.26105
54		108	3.1422	4.4727	6.4867	6.1215	4.5739	5.1091	3.2849	5.1757	3.7522	4.4775	7.1396	6.9468	5.1672	4.8756	4.5615	4.7168	3.246	6.6143	6.7911	6.1907	6.8623	6.8201	4.4372	4.0511	5.1238	4.5017	4.2057	5.7235	5.5645	4.9873	3.8795	6.8976	5.5991	4.9013	4.0477	3.302	4.551		5.08923	53.9163	5.39163	5.39163
55		110	3.5808	4.7824	7.216	5.9449	5.5282	5.1672	3.3003	5.529	3.5492	4.9009	7.4126	6.5861	5.369	4.1888	4.4524	5.0407	3.3473	6.3489	8.0227	5.5417	6.6549	7.0887	3.83	4.516	4.5926	3.8965	4.6736	6.1506	5.93	4.5394	3.998	6.9242	5.5079	5.6926	4.4234	4.4665	5.0293		5.23576	55.4376	5.54376	5.54376
56		112	3.6906	5.2225	6.0336	6.6183	5.3177	5.2226	3.0085	5.8426	3.9686	4.3707	6.4775	7.2206	4.8385	4.338	5.0493	4.8869	2.8588	5.7193	7.3722	6.0553	6.9007	6.473	4.2065	3.4866	4.3865	4.1798	4.3105	5.6967	6.3024	4.2851	3.7064	6.1404	6.5571	4.8965	4.0813	2.8746	5.0193		5.07069	53.8429	5.38429	5.38429
57		114	3.4697	4.6771	6.9272	6.0056	5.6924	5.2732	3.7129	6.2771	3.9821	4.1443	7.5593	7.0884	5.0163	4.5413	4.752	4.399	3.3304	6.446	7.144	5.184	6.0309	6.2933	4.3468	4.3079	4.0673	4.1349	5.6188	6.1591	6.5045	4.9041	3.7759	7.1595	5.8818	5.1668	4.1861	4.4538	3.8729		5.20234	55.2154	5.52154	5.52154
58		116	3.8681	4.8289	7.4423	5.5332	4.8735	5.6464	3.7993	5.4903	3.7092	5.7884	7.2493	7.2878	4.7196	3.9667	5.1174	4.4001	3.3374	5.8457	7.7406	5.8887	7.2413	6.3952	4.4082	4.6936	3.9317	4.1349	5.2316	5.8206	6.2385	4.8652	4.1108	6.5451	6.0898	5.175	4.2721	3.5335	4.4938		5.23551	55.6031	5.56031	5.56031
59		118	3.2679	4.9238	6.7351	5.223	4.5957	4.8671	3.786	5.5554	3.7617	4.1442	8.2176	6.2622	5.1093	4.9177	4.7198	4.6344	2.5156	5.9675	7.4783	5.8288	7.2921	6.4673	4.8313	4.2864	4.706	3.9824	4.4461	6.3091	6.3088	4.885	3.6735	6.3942	5.4246	5.347	4.7608	3.6031	3.881		5.11108	54.4148	5.44148	5.44148
60		120	3.6245	4.9226	6.7455	5.4483	4.4962	4.8938	3.4419	5.4458	3.6455	4.2146	6.6379	6.3098	5.272	3.9944	4.6518	4.7619	2.879	6.1635	6.9712	6.1851	6.3908	6.7915	3.8289	4.2986	4.6244	3.0063	4.1769	5.5873	6.5296	4.7077	4.0641	6.9331	6.0003	5.2308	4.066	3.274	4.2083		4.98443	53.2043	5.32043	5.32043
61		122	3.5076	4.7112	6.8187	5.9837	4.7611	5.2466	3.4104	5.9789	3.0546	4.5159	8.0177	6.4546	5.2606	4.2696	4.6673	4.0766	2.8215	6.9889	7.413	6.1465	6.3349	7.3322	4.3319	3.791	4.8487	3.8566	4.5478	5.3514	5.5019	4.5982	3.4337	6.306	6.0466	5.0088	3.385	3.5916	5.2388		5.07054	54.1214	5.41214	5.41214
62		124	3.2876	4.3299	7.0801	5.9602	5.146	5.1101	3.1668	5.5482	3.9586	4.16	7.6537	7.134	4.8415	4.0056	4.5593	4.4091	3.1255	6.1258	7.5284	6.1782	6.4511	8.0686	4.6904	4.316	4.6287	3.5904	5.2362	6.0841	5.9054	4.8536	4.1868	5.9289	6.129	5.0559	3.7207	2.3216	4.3897		5.10448	54.5168	5.45168	5.45168
63		126	3.4214	4.6086	7.2428	5.1976	5.1985	5.616	3.3615	6.0183	3.5875	5.4353	6.5693	7.3565	4.9678	5.0718	4.4835	5.0708	3.0619	5.588	6.9261	5.7638	6.4113	6.1551	4.0565	3.9654	4.4215	4.3136	4.838	5.9033	6.188	4.5529	4.3911	6.7017	5.5374	5.5545	3.7353	3.6564	4.4211		5.11757	54.7037	5.47037	5.47037
64		128	4.0175	4.6541	7.3496	6.0648	4.9835	4.4604	3.803	5.5836	3.2156	4.3033	6.7589	7.7325	4.9006	4.1285	5.0959	4.5557	2.3853	5.5687	6.9038	5.3948	5.748	6.1234	4.6774	3.7255	5.4204	3.713	3.964	5.5435	7.0729	4.403	3.2967	6.3761	6.3908	5.6662	3.841	3.035	4.5799		5.01181	53.7021	5.37021	5.37021
65		130	3.1442	4.5543	6.209	4.5763	5.5352	5.485	3.0395	5.8719	3.4539	4.9343	6.5336	6.1557	5.3603	4.6462	5.4143	5.1328	2.8037	6.3967	6.6341	5.2131	6.0966	6.3943	4.1729	3.7194	4.2061	3.2059	4.6524	6.8788	6.3078	4.644	4.1587	6.5142	5.2142	5.2098	3.2024	3.8699	4.8613		4.98386	53.4786	5.34786	5.34786
66		132	2.9959	5.0424	7.2602	5.8752	5.2424	4.897	3.1319	6.2416	2.9996	4.7487	6.613	6.4691	5.2899	4.3801	5.4046	4.9961	3.1512	6.4974	7.4431	5.6812	6.392	6.0958	4.8606	4.3347	4.4206	3.8674	5.7816	5.7189	6.0199	4.671	2.5413	6.6794	5.4208	5.4071	4.0285	3.6616	4.5726		5.10363	54.7323	5.47323	5.47323
67		134	2.9487	5.1898	6.586	4.9967	5.0313	4.8046	3.4826	4.9512	3.8356	4.7472	6.9185	6.5706	4.8572	4.689	5.1548	5.1759	2.7093	6.1375	6.2695	6.3762	7.1924	5.6428	4.9524	4.426	4.9322	3.9681	4.6097	5.8803	6.3787	4.217	4.1108	6.6913	6.4485	4.8035	3.8384	3.2029	4.2257		5.05278	54.2798	5.42798	5.42798
68		136	3.0157	4.9454	6.3208	5.2394	5.1949	4.5223	3.4174	5.6001	3.548	4.98	6.9144	6.0516	5.5661	4.7662	4.1839	4.8907	3.0108	6.0125	6.9918	6.0821	5.8753	7.793	5.3206	4.2727	4.2799	3.3415	4.8875	5.91	6.4039	4.3803	4.6241	7.0994	6.0762	4.5858	4.1268	3.6687	4.3318		5.08734	54.6814	5.46814	5.46814
69		138	3.4608	4.9809	7.7475	6.1236	4.5594	5.845	3.7341	6.5792	3.5042	4.3761	7.5097	7.2413	4.8076	4.7831	5.4057	5.1686	2.6515	6.0856	6.0877	5.3926	5.7264	6.2851	5.313	4.0293	3.781	3.1572	4.9198	6.1447	5.7115	5.0736	3.6455	6.5365	6.3068	4.9519	3.3823	2.9868	4.3685		5.09092	54.7732	5.47732	5.47732
70		140	2.9941	5.0136	7.3954	6.3803	4.4317	5.062	3.5628	5.1585	3.4609	5.1642	7.1354	7.4866	4.4906	4.1707	5.5242	4.5952	3.1099	6.4857	6.8883	6.4889	6.6162	6.7876	4.731	4.2359	4.9033	3.9796	4.391	6.3671	6.5563	5.1679	3.7764	7.1081	5.4785	5.3212	4.0189	3.4725	4.192		5.19196	55.8396	5.58396	5.58396
71		142	3.2588	4.8336	6.7096	5.304	4.7075	4.8113	3.3168	5.4008	3.1137	4.9253	7.5421	7.2349	4.8752	3.9562	4.3241	4.4461	3.0511	6.1544	6.9899	5.1259	5.9477	6.5468	4.5017	3.3973	4.2757	3.9039	5.0403	6.7239	6.364	4.393	3.7736	5.8258	5.7279	5.1863	3.708	3.0058	4.3908		4.94037	53.3797	5.33797	5.33797
72		144	3.7918	4.9244	6.872	4.9544	5.1314	4.5496	3.1349	5.3726	3.1626	4.6273	7.5888	6.9062	4.5008	4.1432	4.9394	4.1642	2.9958	5.8958	6.9606	5.0097	7.1047	6.1761	4.5117	3.2983	3.3819	3.9171	5.4604	5.8109	6.4057	4.3197	4.0902	6.7706	5.6537	4.9387	4.1889	3.1816	3.5818		4.9302	53.334	5.3334	5.3334
73		146	2.6378	5.6321	7.1419	5.596	5.3424	5.5414	3.3674	5.3838	3.5541	4.6295	7.2578	7.3747	5.1739	4.9025	5.5248	4.6261	3.3181	6.262	6.9751	6.1292	6.3001	6.9003	4.583	3.9134	4.0753	4.0532	4.8085	5.6868	6.4558	4.9419	3.8829	6.7581	6.8273	5.0707	3.4077	3.1231	5.838		5.21613	56.2493	5.62493	5.62493
74		148	2.693	4.7399	7.1224	5.1648	5.032	4.8097	3.3138	5.9924	3.5546	4.387	6.4019	6.466	4.8391	4.7129	5.6656	4.1818	3.0853	5.2495	6.6067	5.3783	6.3131	5.8641	4.5093	4.8723	4.8873	3.5374	4.9474	6.0281	5.8486	4.1621	4.0705	7.2118	5.7732	5.0092	3.5549	3.7979	3.7959		4.96162	53.7602	5.37602	5.37602
75		150	2.693	4.7399	7.1224	5.1648	5.032	4.8097	3.3138	5.9924	3.5546	4.387	6.4019	6.466	4.8391	4.7129	5.6656	4.1818	3.0853	5.2495	6.6067	5.3783	6.3131	5.8641	4.5093	4.8723	4.8873	3.5374	4.9474	6.0281	5.8486	4.1621	4.0705	7.2118	5.7732	5.0092	3.5549	3.7979	3.7959		4.96162	53.8162	5.38162	5.38162
76		152	3.3327	5.0307	7.5574	5.1871	4.2998	4.2252	2.7419	5.8729	2.9487	4.4681	7.5153	6.9616	5.218	4.3482	4.8068	5.1304	3.0093	5.9968	6.9156	5.4463	6.0739	6.5067	4.8226	4.7706	4.3905	3.7098	4.6129	5.8552	6.2393	4.1906	4.2186	7.2295	5.6746	4.6456	3.4419	2.6684	4.6405		4.992	54.176	5.4176	5.4176
77		154	3.465	4.9762	7.039	5.4473	4.4972	5.1955	2.8948	5.8476	3.5918	4.5282	7.1073	7.0872	5.0312	4.5523	5.8925	5.0361	3.2655	5.4497	7.0343	7.0894	6.9281	6.3483	4.7495	3.8543	4.4085	3.3941	5.2417	6.0981	6.2608	4.3353	3.6057	6.6804	5.5352	5.0057	3.2194	3.8109	4.7813		5.11582	55.4702	5.54702	5.54702
78		156	2.9675	5.8418	6.735	5.4597	4.9949	5.6893	3.7635	5.2787	3.1636	5.0929	6.4657	6.7994	5.3381	4.2763	5.225	4.7495	2.7369	5.8052	6.4346	5.7214	6.0489	6.8216	3.7957	4.6769	3.9256	3.7021	5.1339	5.5013	6.109	4.1563	4.0104	6.5332	6.2589	4.5289	3.7995	3.1996	4.0268		4.99372	54.3052	5.43052	5.43052
79		158	3.6918	5.0226	7.4147	5.3702	4.7892	4.6256	3.7113	5.6547	3.3725	4.0735	7.5642	7.005	5.6303	4.572	4.959	5.3023	2.7471	5.4201	5.9598	6.6817	6.2801	6.2933	5.0141	3.7944	4.5918	4.0676	4.4834	6.4397	6.9324	4.5429	3.6956	7.7234	5.6329	5.3252	3.6193	3.6535	3.6595		5.11667	55.5907	5.55907	5.55907
80		160	2.7653	5.0373	7.4385	4.8681	5.1058	5.0392	3.106	5.6406	3.313	4.4539	7.374	6.3824	5.2191	4.2378	5.3209	4.3107	2.8953	5.3768	7.2324	6.218	6.7333	5.9422	4.1756	4.176	4.3923	3.8532	5.241	5.4336	6.3056	4.2182	3.848	5.4984	6.0407	4.7116	3.5019	3.5326	4.9937		4.97116	54.1916	5.41916	5.41916
81		162	3.385	4.5346	6.4015	5.3143	5.0449	4.7045	2.8208	4.7263	3.4596	4.8589	7.0447	7.0798	4.8623	4.7679	4.1665	4.8782	2.9324	6.2645	7.6394	5.5512	5.6924	7.7159	4.6478	5.0718	4.0587	3.4811	5.6937	6.2143	6.0946	3.9486	3.7964	7.5298	6.4768	5.0678	3.2911	3.4789	4.0548		5.04735	55.0095	5.50095	5.50095
82		164	3.0486	4.8245	6.9285	5.7455	5.0309	4.6967	3.0676	5.519	3.3511	4.5851	7.7858	6.1184	4.5255	4.9253	4.9205	4.8275	2.5151	6.3387	7.3072	5.4063	6.0252	6.3873	4.1037	4.2919	4.4155	3.0514	4.5143	6.1152	6.318	4.3421	3.7253	6.1713	5.2634	4.811	4.0516	3.455	4.5162		4.94665	54.0585	5.40585	5.40585
83		166	2.8806	4.6187	7.1902	4.8985	4.9374	5.0274	3.3282	5.8537	3.6108	5.1023	7.4353	7.6942	5.0969	4.476	5.1345	4.8659	2.6122	6.1873	6.7957	6.735	6.0884	7.4774	4.2871	4.2816	4.1287	3.5251	5.2269	6.5015	6.166	4.1812	2.9927	7.2178	6.4419	5.2424	3.7585	3.3362	5.4792		5.15712	56.2192	5.62192	5.62192
84		168	2.9183	4.9024	6.6422	5.3585	4.8336	4.8845	3.5735	5.9883	3.7467	4.3658	6.66	6.2289	4.4848	4.2284	5.2188	4.3007	2.6806	5.7744	6.0076	6.3657	5.6889	6.1928	4.0001	3.4908	4.6652	3.948	5.0206	5.6061	6.0637	4.0599	3.9006	5.9513	6.6871	4.7592	3.8536	4.2291	4.0577		4.90104	53.7144	5.37144	5.37144
85		170	3.8984	4.5705	6.5578	5.1979	5.1626	4.3311	3.4767	5.4605	3.186	4.2508	6.3787	6.429	5.026	4.0603	5.1258	4.5611	3.2741	6.4933	7.3556	6.2387	6.04	7.3956	5.2536	3.9605	4.4627	3.9126	5.211	5.7214	5.5555	4.3835	3.9029	7.5843	5.8068	4.8888	3.4121	3.8825	4.9769		5.06448	55.4048	5.54048	5.54048
86		172	2.7059	4.9248	7.9715	5.677	4.2469	4.334	3.0962	5.5782	3.5532	4.1139	7.5085	6.3246	4.7375	4.272	5.1129	4.9447	2.4906	5.8851	7.619	5.9245	6.4286	6.6379	4.5226	3.8635	3.629	4.161	4.4204	6.0025	6.0978	3.839	3.5681	6.844	5.5262	4.8235	4.1551	3.6914	4.4634		4.96473	54.4633	5.44633	5.44633
87		174	4.002	5.164	7.2512	5.8677	4.524	4.9528	3.4281	5.353	3.107	4.08	6.9425	6.4685	5.577	4.2659	5.6807	5.1016	2.4248	5.5842	7.1492	6.5812	6.1988	6.5218	4.7034	3.4753	4.0404	3.5281	5.4489	5.5553	5.8422	4.3648	3.95	6.9703	5.5354	4.8244	3.6238	3.8837	5.8496		5.07626	55.6346	5.56346	5.56346
88		176	3.6132	4.2493	7.1623	4.8583	5.167	5.2223	3.4358	5.7304	3.9038	4.2013	6.3681	6.6236	4.9184	4.5849	4.5249	4.7805	2.9549	5.7257	7.4254	5.228	6.0082	6.8221	4.2793	3.2766	4.7931	3.4341	4.7263	6.116	6.311	4.5782	3.599	6.4912	6.5079	4.2992	4.3227	4.0522	5.3455		5.01732	55.1012	5.51012	5.51012
89		178	3.3879	4.2519	7.6441	5.3727	4.5649	4.9676	3.4113	5.1346	2.9443	4.2561	6.6001	6.6004	4.4863	4.3452	4.8742	5.4734	2.5788	5.4494	6.4228	6.8306	6.7108	6.7047	4.6744	3.6592	4.1328	3.6306	4.8997	5.1671	5.7718	4.4896	3.6618	6.3396	6.0803	4.8334	3.5004	4.1113	4.4805		4.93094	54.2934	5.42934	5.42934
90		180	3.2696	4.5625	7.1275	4.6351	5.1146	4.871	3.3137	5.3433	3.6115	4.0111	7.09	6.5723	5.6521	3.9646	4.2651	5.3178	3.0777	6.0562	7.0419	6.3253	6.7382	6.5686	5.2675	3.4331	4.1195	3.5172	4.4358	5.9346	6.8148	3.9507	3.8171	6.4572	5.8963	5.1952	3.4441	3.4713	3.9064		4.97812	54.8212	5.48212	5.48212
91		182	2.8637	4.6069	7.0881	5.0631	4.2463	4.9146	3.0981	5.5462	3.2847	4.467	7.0838	6.747	5.0845	4.0842	4.0615	5.0659	2.7641	6.8198	7.4274	5.0398	6.5671	5.8576	4.2781	3.8753	4.1853	4.5885	3.8743	5.6942	5.5917	4.18	3.4706	6.345	5.9845	5.2983	3.3636	4.4484	5.4012		4.92866	54.3826	5.43826	5.43826
92		184	3.1188	4.4473	7.1201	6.2026	4.8362	4.7714	2.4926	5.485	3.1195	4.0046	7.2038	6.4453	5.064	5.2262	4.3837	4.3525	3.0028	6.4141	6.23	5.4556	5.9695	5.1626	3.8154	3.7315	4.516	3.7201	4.5237	6.2027	5.9013	3.7496	3.689	7.0779	4.9202	4.7269	4.0231	3.9365	4.567		4.8543	53.695	5.3695	5.3695
93		186	2.6978	4.3547	6.8466	5.1394	4.9965	4.6624	2.9833	5.5554	3.6541	3.8648	7.8082	6.1328	4.719	4.4672	4.6711	4.7443	3.0532	5.998	7.13	5.8718	6.2831	7.1772	4.2334	4.5836	4.4364	3.4934	4.7407	5.3232	5.7923	4.6769	3.1642	6.9698	6.2712	5.4735	3.5947	4.0528	5.2791		4.99719	55.1799	5.51799	5.51799
94		188	3.1002	4.7815	7.3996	5.6466	4.3511	4.4413	2.8916	5.3682	3.6197	4.4536	7.6432	7.0534	4.8392	4.2865	4.4718	4.8771	2.4588	5.7558	6.4836	6.1763	5.5406	6.6876	5.0946	4.1895	3.4392	4.2317	4.9436	5.0866	5.3546	4.114	3.7665	6.612	6.3147	5.0179	3.8882	4.4593	4.6948		4.96039	54.8679	5.48679	5.48679
95		190	3.135	4.7575	6.1948	5.4906	4.6644	4.3903	2.8149	6.0284	3.3251	4.5533	7.0471	6.0143	5.0112	4.5877	4.5557	4.9526	2.9696	6.3791	6.6471	5.7346	6.4868	6.7927	4.6297	4.4108	4.6192	4.0154	5.1724	5.6366	5.5777	4.3795	3.7844	6.5032	5.7602	4.7604	3.296	3.8416	4.299		4.95186	54.8386	5.48386	5.48386
96		192	3.3667	4.2791	7.4343	5.3717	4.2631	4.4706	3.5454	4.8689	3.5732	4.9401	7.0937	5.7771	4.9667	4.4662	5.0282	4.7281	3.0917	5.4322	8.0881	5.3588	6.5928	6.525	4.1096	3.7317	5.0573	3.5765	4.5321	5.5441	6.5597	4.5314	3.7898	6.7613	6.4467	4.8804	3.792	3.4773	5.4519		5.01361	55.5121	5.55121	5.55121
97		194	3.3265	4.7055	7.5186	5.6719	4.5469	4.6057	3.4282	5.6596	3.4652	4.8218	6.5554	6.9799	4.9646	4.5937	5.2304	5.2946	3.2473	6.1189	7.2017	6.0806	6.0237	6.1217	5.2404	4.4036	4.2838	4.8869	4.4181	5.9242	6.3509	4.1763	3.2205	6.5874	6.089	5.2564	3.7783	3.9614	5.2233		5.13413	56.7733	5.67733	5.67733
98		196	3.2615	4.623	6.6954	5.3274	4.9204	4.8473	3.318	5.256	3.7659	3.8441	7.3153	6.8762	5.1303	3.8526	5.1824	5.46	2.7981	6.35	7.4649	5.8502	5.852	6.1261	4.4006	4.1176	3.9297	4.5705	4.4489	5.8513	5.9201	3.8521	4.0048	7.1741	5.7966	4.9606	3.3765	3.4175	4.3701		4.9813	55.301	5.5301	5.5301
99		198	2.9884	4.4642	6.556	5.2828	4.9588	4.6295	3.1368	5.2608	3.8701	3.5781	7.0948	6.9265	4.5627	3.7745	5.3737	4.9724	2.5328	6.5228	7.2803	6.0698	5.7831	6.3525	4.7311	4.1869	4.1112	4.1493	4.0595	5.0575	6.5187	4.341	3.3393	5.8977	5.925	4.826	3.4908	4.1251	5.8361		4.93423	54.8863	5.48863	5.48863
100		200	3.1345	4.4649	6.3509	6.0154	4.4871	4.9597	2.4951	6.1509	3.578	4.1397	6.8182	7.1805	4.9724	4.1211	4.3974	5.0108	2.5254	6.914	6.7977	6.0416	6.2439	6.4608	4.171	3.8709	4.3198	3.5596	4.5111	5.3556	5.6588	4.3765	3.1674	6.7462	5.0417	4.7647	4.2268	3.3658	5.2235		4.90863	54.6863	5.46863	5.46863
101		202	3.059	4.1624	7.1394	5.4519	5.0685	4.6371	3.0856	5.2358	3.4278	4.768	6.7741	6.723	4.8437	4.4389	5.8794	5.4482	3.0389	6.3242	7.1293	6.5043	6.4093	7.1084	4.8939	3.5007	4.5199	3.5477	5.2162	5.9651	6.5238	4.1293	3.6074	6.3514	6.4483	4.9268	3.6678	3.2758	4.8649		5.08368	56.4928	5.64928	5.64928
102		204	2.8697	3.9387	7.177	5.5237	4.9656	4.1369	2.4248	4.8822	3.2974	4.7009	7.0234	6.6263	4.2977	4.1346	5.4428	4.5351	2.9524	6.6982	7.5605	5.3378	6.4888	6.0623	5.851	3.972	3.7342	3.7331	5.403	5.6553	5.6568	4.4039	3.4907	7.0158	5.3015	4.0185	3.4814	3.6061	4.7512		4.89598	54.6718	5.46718	5.46718
103		206	3.0035	4.1365	7.1183	5.6256	4.6883	4.9455	2.9686	5.3318	3.243	4.3957	6.3806	6.0879	4.3319	4.8287	4.585	4.6968	3.1347	5.7366	7.4037	6.273	6.1112	6.3033	4.6185	3.136	4.1993	3.145	4.5946	5.438	6.8876	3.9388	3.3272	6.1115	6.3579	4.7115	4.2253	3.5408	5.0744		4.88207	54.5887	5.45887	5.45887
104		208	3.4255	4.1101	6.8989	5.4212	4.0286	4.4499	2.4385	5.3767	3.2873	4.9151	6.6776	6.1862	4.7749	4.3791	5.5273	4.8262	2.6379	6.0715	6.4545	6.5614	6.0382	5.848	4.7485	3.6816	3.8336	4.0028	5.3422	5.5283	6.5691	4.3679	3.5592	6.5297	6.2635	5.1274	4.0034	2.9442	4.7086		4.90661	54.8901	5.48901	5.48901
105		210	3.0824	4.4158	7.1753	5.065	4.5217	4.6417	3.5414	4.3599	3.5621	4.2146	5.9362	6.299	4.2789	4.7554	5.6176	4.9441	2.6779	5.4866	6.9363	5.7173	5.8274	6.5547	5.0601	4.3349	3.9793	4.0903	5.1819	5.7788	6.5557	4.6877	3.7031	5.8054	6.2664	5.1006	3.8567	3.3914	4.2059		4.90836	54.9636	5.49636	5.49636
106		212	3.4293	4.4812	6.8477	5.3321	4.3219	4.155	3.1498	5.4434	3.4872	4.048	6.4464	6.9881	4.6684	4.6356	4.9211	4.897	2.75	5.4527	6.9719	6.0534	6.1713	6.411	4.2568	4.2532	3.9412	2.9789	4.4241	5.883	5.665	4.3548	3.9347	7.3033	5.7091	4.5838	4.3965	3.1358	4.6047		4.87804	54.7164	5.47164	5.47164
107		214	2.5277	3.6025	6.9147	5.6216	4.0755	3.6745	3.0092	5.7817	2.995	4.0955	5.6729	6.5532	4.1643	4.1808	4.8646	4.0375	2.7776	5.7553	6.7809	5.9994	5.5928	6.4179	4.6515	3.939	3.361	3.2115	4.7514	5.5965	5.8327	4.5534	3.5924	5.7816	5.8339	4.5117	3.4641	2.8896	3.9978		4.62333	52.2253	5.22253	5.22253
108		216	3.2495	4.3836	6.8889	4.6253	4.1769	5.0327	3.0838	4.8512	3.5886	3.6832	7.1486	6.4343	4.7741	4.5171	5.3177	5.1784	3.0798	6.0216	8.0701	6.8057	5.7955	5.9134	4.1039	3.7607	3.8542	3.8203	5.1487	5.4535	5.7528	4.2391	3.6294	7.2678	5.6182	4.9764	3.9993	2.9594	4.211		4.9031	55.079	5.5079	5.5079
109		218	2.7656	4.1578	6.4662	4.3715	3.498	5.1186	3.3745	4.5706	3.2676	4.3236	7.2168	6.5557	4.7723	4.2928	5.1143	4.7727	2.8724	6.2552	6.6823	6.3926	6.1157	6.4262	4.104	3.8982	3.9041	3.6347	4.8153	5.4723	5.7651	4.3878	3.1922	6.5809	6.4262	5.0728	3.7002	3.5978	4.6306		4.82609	54.3649	5.43649	5.43649
110		220	3.1228	4.1534	6.4618	5.5516	4.5697	4.5728	3.119	5.0915	3.046	4.3727	6.6024	6.7209	4.8609	4.3764	5.3904	4.744	2.17	5.4864	7.3552	6.8744	6.5401	6.5509	4.6022	3.3017	4.3126	3.6439	4.8699	6.2058	6.1308	4.7355	4.1533	6.8832	5.7732	4.7249	3.4477	2.9867	3.6928		4.89723	55.1323	5.51323	5.51323
111		222	3.1494	4.6736	7.0034	5.417	4.8086	4.6376	2.5863	4.8425	2.7992	3.9447	6.6321	6.6862	4.9671	4.5798	5.2098	4.0395	3.0845	5.2853	7.1242	5.9073	6.4884	6.5398	4.5325	3.69	4.1398	3.8232	5.1559	6.3972	6.3229	4.841	3.9322	6.7775	5.1286	4.9078	3.8603	3.5196	4.3873		4.91411	55.3571	5.53571	5.53571
112		224	2.776	4.2771	6.9363	5.1745	5.4162	5.1846	2.4932	5.0568	3.3489	4.9012	7.2685	6.3632	4.3798	4.4769	6.1104	4.2069	3.1963	5.9143	7.1558	5.3931	5.8367	6.1171	3.8663	4.2082	4.3984	4.3419	3.8974	4.9312	6.132	3.228	2.9443	6.9479	5.4168	4.9004	3.6605	3.0819	4.4477		4.82126	54.4846	5.44846	5.44846
113		226	2.776	4.2771	6.9363	5.1745	5.4162	5.1846	2.4932	5.0568	3.3489	4.9012	7.2685	6.3632	4.3798	4.4769	6.1104	4.2069	3.1963	5.9143	7.1558	5.3931	5.8367	6.1171	3.8663	4.2082	4.3984	4.3419	3.8974	4.9312	6.132	3.228	2.9443	6.9479	5.4168	4.9004	3.6605	3.0819	4.4477		4.82126	54.5406	5.45406	5.45406
114		228	3.1932	4.4582	6.6143	5.8089	4.9332	4.69	2.8234	5.1667	2.7124	4.4788	6.2697	6.2631	4.2728	4.1414	4.9694	4.7243	2.6078	5.7982	7.1592	5.2968	6.2949	7.4006	5.0924	3.5161	3.8905	3.1305	4.9167	5.3231	5.7614	3.5406	3.3906	6.4815	5.4718	4.2817	4.227	2.8168	4.4526		4.76677	54.0517	5.40517	5.40517
115		230	3.129	4.4488	6.2373	5.1914	5.0228	5.1505	2.8104	4.5994	3.3041	3.8241	7.5782	7.5027	4.3441	4.5164	5.0702	4.0103	2.6878	5.7164	6.8833	5.6874	6.6561	6.1857	4.2102	4.0682	4.2592	3.7287	4.7921	5.5515	6.1899	4.2547	3.4773	6.4893	6.1326	4.3905	3.7331	3.4848	4.413		4.85761	55.0161	5.50161	5.50161
116		232	2.7442	4.2589	6.8303	4.9625	3.2427	4.1943	2.9156	4.6415	3.1506	4.3738	5.7356	5.5983	4.3372	3.7336	4.3807	4.7172	3.0622	6.2922	7.1305	5.5812	5.9404	6.3883	5.4698	3.6131	4.095	3.8971	4.1453	5.3729	6.1269	3.9391	3.0077	6.4482	5.4992	5.0517	3.3902	2.8409	4.3024		4.63274	52.8234	5.28234	5.28234
117		234	2.7478	3.6073	6.9912	6.1001	4.1938	5.0496	2.9567	4.5527	3.3021	3.8633	6.1132	5.6891	5.0014	3.864	5.2004	3.9048	2.7729	6.4504	7.6108	5.7668	5.8029	4.7572	4.7622	3.464	3.7461	3.7881	4.1135	5.8257	7.2034	4.0327	2.9854	6.1007	5.8284	4.6384	2.785	2.8961	3.9639		4.66033	53.1553	5.31553	5.31553
118		236	3.1595	4.0545	6.2151	5.2447	4.6715	4.4242	3.1253	5.4311	3.3157	3.527	6.5079	6.4741	4.5649	4.6491	4.4916	4.3701	2.8937	6.3918	6.6838	5.7747	6.6271	6.1295	4.9263	3.1761	4.4418	2.7975	5.0344	5.9108	6.031	3.8616	3.2112	5.8809	6.0052	4.9914	3.9953	2.4325	4.4264		4.75268	54.1348	5.41348	5.41348
119		238	3.0623	4.1447	7.0179	5.2382	4.563	4.576	2.8257	5.3443	3.5605	3.122	7.2949	5.8426	4.4111	4.3216	4.8335	4.4651	2.4041	6.1258	6.8799	6.5055	5.5235	6.2586	4.8184	4.0184	3.11	3.583	5.2777	4.6822	5.7532	4.2087	3.5495	6.3751	6.3715	5.0524	3.2588	2.7977	4.4755		4.74738	54.1378	5.41378	5.41378
120		240	3.3564	3.9623	6.8511	4.8245	4.2646	4.0382	3.5053	4.7358	2.8604	4.4468	6.751	5.9234	4.1193	4.1995	4.4933	3.8382	2.6001	6.0975	6.4974	6.5165	6.4555	6.9735	4.3929	4.0014	3.6854	3.3551	5.0374	5.2299	5.6278	3.8604	3.1815	7.3804	5.6928	4.9887	3.7373	3.17	4.2209		4.72628	53.9828	5.39828	5.39828
121		242	3.4322	4.6277	7.1872	5.6872	3.6565	4.363	3.4484	5.1301	2.6883	3.8615	6.3272	5.8442	4.4891	4.9801	4.4164	4.4016	3.5597	5.8903	6.4999	6.0038	5.5415	6.7933	4.2446	2.9203	3.5692	3.0902	4.4054	5.4862	5.6322	4.1147	3.2216	6.2776	5.9285	4.787	3.692	3.1353	4.0138		4.68508	53.6268	5.36268	5.36268
122		244	2.7145	4.6798	6.7203	5.4334	4.5045	4.156	3.053	5.5573	3.2182	3.9866	7.1344	6.3683	4.3791	4.1746	4.5058	4.614	3.013	6.2094	6.7201	6.053	6.3282	5.7336	4.1967	4.0385	3.7374	3.5339	4.8386	5.9429	7.0307	3.5788	3.0711	6.4605	5.9625	4.8504	3.0064	3.0747	4.131		4.77598	54.5918	5.45918	5.45918
123		246	2.8848	4.4219	6.9578	5.2136	4.0285	4.0943	3.4097	5.2171	3.5067	3.7991	5.874	5.4537	4.8872	3.8356	4.102	4.4609	3.1656	5.4348	6.3636	6.0761	5.3156	7.1704	4.2011	3.366	3.7525	3.4109	4.8723	5.7009	6.2906	4.0698	3.9275	6.1486	5.346	4.9654	3.7055	3.336	5.1195		4.69961	53.8841	5.38841	5.38841
124		248	3.3874	4.7612	6.6878	5.1893	4.9479	4.3951	2.5475	5.0492	3.1232	3.6019	5.6558	5.6006	4.3555	4.3101	4.3317	4.4902	2.8578	5.8368	7.0287	5.8895	6.6635	5.4336	4.169	3.1785	3.7651	3.5969	4.4181	5.498	6.3942	3.775	3.9659	5.8657	5.006	4.0543	3.8056	3.1642	4.3701		4.62624	53.2064	5.32064	5.32064
125		250	3.0693	3.6292	6.7725	5.2687	4.3968	5.001	2.9592	4.7066	4.1009	3.8731	6.88	5.8503	4.6424	5.0188	4.5323	4.5222	2.6716	6.7059	6.5977	6.3862	5.6725	6.8831	3.7418	3.9376	4.1607	3.3305	4.7084	5.5415	6.1043	4.2712	3.5708	6.1892	5.9561	4.8081	3.9209	3.1932	4.8444		4.82214	55.2214	5.52214	5.52214
126		252	3.3162	4.2089	6.5758	4.9736	4.4108	4.7359	2.4109	5.031	3.0384	4.3122	6.9891	6.0879	4.5041	3.9851	4.6349	5.274	2.568	5.7516	7.4941	6.0398	5.1892	6.2527	4.669	3.9845	4.2061	3.6395	4.5151	5.277	5.3992	4.4928	3.3193	6.4547	5.8107	4.733	2.9589	3.1219	4.7208		4.73207	54.3767	5.43767	5.43767
127		254	3.1173	4.6862	6.7954	5.0716	4.4039	4.5455	2.8455	5.4673	3.1186	4.3987	6.2598	5.9562	4.4647	3.913	4.391	4.2162	2.6517	5.3848	6.778	6.5006	5.8569	5.6783	4.2288	3.5871	3.8873	3.4375	4.7925	5.6678	5.8222	4.3937	3.6681	6.128	5.3325	4.7756	3.4104	2.7683	4.9505		4.68518	53.9638	5.39638	5.39638
128		256	2.976	4.3759	6.6937	5.1174	4.3872	4.4379	3.1822	5.3249	2.8393	3.5063	5.7801	6.2423	4.292	4.2476	4.7024	4.4893	2.3695	5.8261	5.9995	5.8963	5.5679	7.7328	5.5111	3.2911	3.5833	2.6268	4.1057	5.4944	5.9809	3.3926	3.4486	6.8759	5.2284	4.8105	3.7879	3.2931	4.4213		4.64428	53.6108	5.36108	5.36108
129		258	2.7277	4.2931	6.8477	5.704	4.4675	5.0653	3.029	4.9117	3.0929	3.482	6.5788	6.0562	4.3179	4.4666	4.2519	5.2432	3.2165	5.8416	7.7241	5.5834	5.4426	6.859	4.793	3.318	3.3181	3.1278	4.6394	5.0509	6.1236	3.7368	3.8518	6.4378	6.1706	4.9403	3.13	3.2993	4.9309		4.75868	54.8108	5.48108	5.48108
130		260	2.6981	4.3758	7.6176	5.0222	3.8555	4.3075	2.5282	5.6162	2.7967	3.6797	6.6399	6.0317	4.1162	3.6267	4.1404	4.5934	2.839	5.9297	6.1755	6.0397	5.3507	5.0931	4.7833	3.2802	3.6993	3.7886	4.2895	4.5951	5.6181	3.6794	3.3722	5.7343	4.7885	4.5429	3.7109	3.5185	4.6393		4.51658	52.4458	5.24458	5.24458
131		262	2.4735	4.1275	6.9863	4.9776	3.9518	4.3308	2.3606	5.8998	2.791	3.5012	6.8876	5.7365	3.8958	3.9927	5.2734	4.8971	3.0201	5.9204	7.6561	5.8629	5.1602	6.3951	4.1224	3.3678	3.8738	2.8532	4.3442	4.994	5.1187	4.2485	2.7143	6.4199	5.3982	4.8024	3.5358	3.5337	3.6682		4.57008	53.0368	5.30368	5.30368
132		264	3.6708	4.2243	6.0763	4.838	4.3419	4.4101	3.2248	4.6052	3.8857	3.9228	5.7431	6.4326	4.9525	4.1331	4.8996	4.662	2.3704	5.9615	7.2894	5.9769	5.055	6.1863	4.4791	3.9488	3.69	3.2056	4.2304	5.3081	6.095	3.9532	3.1066	7.5447	5.2523	4.6348	3.6738	2.9391	5.2967		4.70866	54.4786	5.44786	5.44786
133		266	3.3893	4.4189	6.3469	5.3232	4.5046	4.2541	3.1854	4.8428	2.6385	3.0071	6.4854	5.6949	4.5548	4.656	5.2048	4.3841	2.9361	6.6396	6.762	5.0048	5.2748	5.5068	4.6185	3.3487	4.1193	2.761	4.4333	5.9205	6.2064	3.9781	3.5801	7.8829	5.2473	5.0138	3.5081	2.8828	4.7645		4.68325	54.2805	5.42805	5.42805
134		268	2.4446	4.1744	6.4987	4.3219	4.7747	4.6332	2.9552	4.8937	3.2225	3.4469	6.1425	5.721	4.7332	4.8719	4.3795	3.8148	2.7359	6.3108	6.7577	5.2018	5.401	6.0229	3.6682	3.6041	4.0045	3.1479	4.5621	6.0494	6.2124	4.358	3.394	8.1823	5.6842	4.7501	2.812	3.4874	4.7624		4.65237	54.0277	5.40277	5.40277
135		270	2.9597	4.4308	7.4478	4.4	3.9453	4.1118	2.6747	5.3193	3.3211	3.8737	6.1139	6.3949	4.1075	4.4346	4.6026	4.4758	2.8741	5.6459	6.2623	5.4075	4.6693	7.1768	4.7155	3.6864	3.4675	2.9994	4.3431	5.2936	7.1567	4.082	3.1436	9.5954	5.3999	4.6283	3.1501	2.6822	4.036		4.67646	54.3246	5.43246	5.43246
136		272	2.8806	4.3149	6.8381	5.1523	4.5897	4.3168	3.1847	4.6496	3.5414	4.6013	5.5646	6.0826	4.1601	3.8305	4.5503	4.8267	2.954	5.8749	6.3059	5.8273	5.9888	6.3815	4.9826	3.562	3.8639	3.1072	4.5726	5.9082	5.7183	4.3479	3.9402	10.6546	5.6561	4.873	3.4374	2.9678	4.8904		4.8351	55.967	5.5967	5.5967
137		274	2.4602	4.3571	6.4915	5.5528	4.4313	4.4771	2.319	5.2417	3.7032	4.3943	6.2062	6.1802	4.2837	4.1813	4.5104	4.1446	2.5144	6.5936	5.9157	6.2976	5.8949	5.8926	4.1906	3.1061	3.6826	3.7972	4.8223	5.2401	5.563	3.5871	3.2218	8.945	5.3421	4.1906	3.0354	2.7659	4.0838		4.6383	54.055	5.4055	5.4055
138		276	2.8542	4.8377	6.3742	4.7891	5.2303	4.2756	2.1848	4.9465	2.9141	3.6976	5.981	5.4768	4.8674	3.7949	4.5716	4.4143	2.5742	6.3566	7.2925	5.0528	4.9058	6.3748	4.4097	3.9945	3.8722	3.0894	4.5683	5.2548	5.6341	3.867	3.0236	8.8682	5.7984	4.7487	2.8787	3.3039	3.8766		4.6204	53.932	5.3932	5.3932
139		278	2.8855	4.0856	6.4382	5.8279	4.443	3.7819	2.458	5.587	3.1027	4.0053	6.3834	5.7378	5.1423	4.3182	4.9273	3.9778	2.9965	6.4875	6.6118	6.2015	5.9498	6.4697	4.9363	4.1034	3.0929	3.1251	4.5131	4.9182	5.5378	3.7333	3.4742	7.5229	5.0086	4.8514	3.0001	3.0256	3.8869		4.66347	54.4187	5.44187	5.44187
140		280	3.1929	4.0666	6.8934	4.6698	5.0113	4.7095	2.9206	5.0352	3.2289	3.9212	6.0268	5.3504	4.2828	3.5667	5.928	5.1385	2.1721	6.3542	6.3424	5.6676	5.5114	5.7668	4.1699	3.2386	3.76	3.4129	4.4139	5.7604	6.543	4.0826	4.1563	8.2465	5.6643	4.669	3.8114	3.2583	4.4014		4.73907	55.2307	5.52307	5.52307
141		282	2.393	4.4633	6.4829	4.8972	4.2148	4.59	2.5187	4.8141	2.899	3.6862	6.3338	6.0232	4.8026	4.1233	4.513	4.4688	2.262	5.5999	6.4277	5.9388	5.2011	6.3555	4.8025	2.7795	3.8854	3.6593	4.203	5.3753	5.7316	3.122	3.6389	7.9673	5.993	4.0138	3.3525	3.2794	5.4565		4.60186	53.9146	5.39146	5.39146
142		284	2.5802	4.1167	6.7925	4.6803	3.8314	4.9392	2.6083	5.0451	2.8579	3.2831	6.3985	6.2841	4.7624	3.9283	4.1505	4.3625	2.8452	5.8657	6.5961	6.1452	6.3916	7.3209	4.943	3.2127	4.1237	3.33	5.1986	5.3912	5.5829	4.2536	3.4114	8.2591	5.2351	4.2913	3.5684	3.4491	4.3801		4.71394	55.0914	5.50914	5.50914
143		286	2.3201	4.0898	6.0588	5.1224	4.3612	3.9444	2.7083	5.0794	3.4049	3.7035	5.9243	6.367	5.3223	3.9936	4.3352	4.327	3.3293	6.4079	7.6403	6.3996	6.0943	6.8188	4.5512	4.1033	3.5779	4.2576	4.7924	5.118	5.9249	3.9826	3.5221	7.5218	5.5336	5.2007	3.5412	3.1457	4.6601		4.7888	55.896	5.5896	5.5896
144		288	2.8688	4.6855	6.9988	5.0038	4.2647	4.6359	2.9702	4.2416	3.1528	3.68	6.6953	5.9662	3.9726	4.0609	4.7025	3.8927	2.705	5.898	7.0691	6.692	5.7475	6.0963	4.6179	3.434	3.7527	3.8307	4.4842	5.3717	5.9916	4.2775	3.7469	7.937	5.1357	4.692	3.177	2.8404	4.5128		4.69736	55.0376	5.50376	5.50376
145		290	3.2472	4.3757	6.8506	4.7089	4.0351	5.0195	2.3077	4.9244	2.8509	3.5131	5.9638	6.7659	4.6674	4.0418	4.6854	4.5053	2.5558	6.0774	6.0458	5.5334	5.9198	6.7619	3.7796	3.597	3.523	2.8431	3.6002	5.428	5.9902	3.8949	3.2364	8.0321	5.509	5.0847	3.3509	2.701	4.4558		4.60494	54.1694	5.41694	5.41694
146		292	3.0153	4.4116	6.2223	4.7815	3.9138	5.0044	2.7629	5.2292	2.6653	3.3396	6.6536	6.2718	4.6744	3.9096	4.4513	4.667	2.8361	5.7899	6.816	5.2455	5.5842	5.7074	4.7217	3.7506	3.365	3.2797	3.9085	5.2674	5.679	4.5091	3.0638	8.5221	6.1701	5.3798	3.6775	3.3132	4.6783		4.68212	54.9972	5.49972	5.49972
147		294	2.6054	4.4576	7.1353	4.8392	4.135	4.4728	2.708	4.8705	2.5423	3.9385	5.747	6.4184	4.4115	3.8585	4.8025	4.3553	2.715	7.0794	6.7315	5.6761	4.9095	6.1077	4.1582	2.9327	3.3242	3.6037	3.7567	5.0088	6.0318	4.5885	3.3344	7.0204	5.4809	4.803	3.6718	3.484	4.0787		4.58905	54.1225	5.41225	5.41225
148		296	3.4	4.3936	6.7998	5.8688	4.3292	4.426	2.7471	4.2172	3.2515	3.6154	5.9923	6.132	5.1636	4.3295	4.4487	4.0896	2.739	5.4686	6.1742	6.8206	5.6641	5.8785	4.5461	3.8573	2.9693	3.9845	4.3175	6.0171	6.4467	3.5661	3.7685	7.3957	5.7811	5.0919	2.8061	3.1371	3.8264		4.68813	55.1693	5.51693	5.51693
149		298	2.7894	4.1734	6.3469	5.6497	4.3528	4.5456	3.0883	4.7892	3.2267	3.4003	5.9867	6.065	3.6874	4.118	4.558	4.6542	2.6687	6.258	6.6593	5.7583	5.5671	5.0823	3.9586	3.7129	4.1383	3.7689	4.3404	4.9933	5.2848	4.1528	2.8046	7.5649	4.9341	5.0481	3.3221	2.9371	4.4804		4.56396	53.9836	5.39836	5.39836
150		300	3.1348	4.3739	6.4383	4.9734	3.9551	4.4261	3.112	5.109	3.3044	3.2467	6.1163	6.1051	4.7681	3.6333	4.6472	3.6628	2.6813	6.7682	7.0711	6.7318	5.4949	6.808	4.0361	3.7677	3.44	2.8787	5.0675	5.4928	5.2318	3.9705	3.4804	7.2333	5.2844	4.8439	3.1957	3.2525	3.9929		4.64135	54.8135	5.48135	5.48135














































[truncated: 29 more columns]

## Sheet: Figure 3E
	Control	ISO	EGTA
	Pyruvate	Pyruvate + ISO	Pyruvate + EGTA
	31.9522	3.27421	17.5182
	35.803	6.47276	89.0903
	41.577	9.00262	53.9447
	27.8848	3.17705	40.3761
	50.7009	2.88979	35.0564
	23.1316	1.20011	19.865
	54.4243	36.6435	85.7852
	45.7558	5.08725	77.1963
	38.4003	2.72184	58.806
	29.8792	45.0713	62.7141
	39.4032	35.3281	100.766
	40.918	5.96794	50.3118
	45.0928	2.14111	55.406
		6.64983	54.4828
		21.2588	58.6738
		10.3802
		0.997925
		13.0727
		17.385
Average	38.8402	12.038	57.3329
SD	9.06702	13.279	23.8709
SEM	2.51474	3.04641	6.16343
TTEST		1.59259e-07	0.0122081
ATP(fold change)	1	1	1

## Sheet: Figure 3F
Mg2+-green fluorescence																		Average	SEM	N
control	1.00085	0.998975	0.99882	0.997314	1.00191	0.989529	0.994573		1.00225	1.04483	1.03397	1.02779	1.03603	0.993308	1.02277	0.989486		1.00883	0.00482953	15
ISO	0.959008	1.09625	1.02951	1.01435	1.00527	1.00401	1.01839	0.947212										1.00925	0.0160941	8
EGTA	1.02805	0.989463	1.01431	1.00862	0.996979	1.01401	0.9939											1.00648	0.00517726	7

## Sheet: Figure 3G
Perceval HR signal
												Average	SEM	N
Control		0.992785	1.01071	0.994026	0.993944	1.02389	1.00974	0.99218	0.990292	0.992437				9	1	0.00393952
ISO		1.00807	1.02764	0.999872	1.00593	1.04459	1.02539	0.998682	1.00284	1.0087				9	1.01352	0.00518647
EGTA		1.05074	0.994345	1.04496	0.986105	1.05508	1.04481							6	1.02934	0.0125136
