# Supplementary material for: Mitochondrial flashes regulate ATP homeostasis in the heart
Source: eLife. 2017 Jul 10;6:e23908. doi: 10.7554/eLife.23908 (PMC5503511; doi:10.7554/eLife.23908)
Supplement: Figure 4—source data 1. — This file contains raw source data used to make the graphs presented in Figure 4. Excel software was used to graph all the quantitative data and perform statistical analyses. Student’s t-test was applied to determine the statistical significance. Prism linear regression analysis was used to investigate the correlation between mitoflash activity and ATP content. The coefficient of determination (R2) was used to evaluate the goodness of fit of the linear regression model. DOI: http://dx.doi.org/10.7554/eLife.23908.012 [file elife-23908-fig4-data1.xlsx]

## Sheet: Figure 4A and 4B
	10 mM pyruvate
	Mitoflash (fold change)								ATP(fold change)
	control	mitoTEMPO	SS31	LacZ	SOD2 OE				control	mitoTEMPO	SS31	LacZ	SOD2 OE
	0.856425	0.983455	0.202927	0.939274	0.127334				0.958487	2.30216	1.88029	0.00302629	0.00453944
	1.12886	1.38277	0.484807	0.201606	0.339601				1.22715	2.4766	0.990043	0.0124078	0.00625434
	1.88778	0.510374	0.0916806	0.509401	0.480577				0.670597	2.20706	1.84602	0.0148288	0.00696048
	1.38914	0.835268	1.05735	0.544621	0.352431				0.978257	1.27268	1.59289	0.0327849	0.0098859
	1.07696	1.16017	0.661595	0.626987	0.774008				0.825362	0.791795	1.33081	0.0373243	0.0250174
	1.42865	0.860014	0.0941839	1.35719	0.143611				0.589113	1.05332	0.858517	0.0389383	0.0280437
	0.895196	0.75474	0.434249	1.21456	0.8534				0.771597	1.57895	1.05611	0.0403506	0.0463023
	0.293563	0.452025	0.397107	1.2778	0.175405				1.584	1.59649	0.754144	0.0436795	0.0592145
	0.473418	0.381708	0.206014	0.780792	0.366702				1.04976	1.25373	1.13224	0.0478155	0.0664776
	0.933748	0.0112959	0.324285	1.40002	0.558662				0.79608	1.00308	1.032	0.0488242	0.0999686
	0.888242	0.75685	0.308963	1.57966	0.509976				1.12173	1.37217	2.80279	0.049026	0.10592
	0.753197	1.20273	0.427142	1.73312	0.562439				0.765742	1.36103	1.89262	0.0511444	0.117622
	1.14851	0.340748	0.227617	0.784137	0.367949				0.647913	1.10636	1.73937	0.0556838	0.118832
	0.743128	0.175646	0.307783	1.55627	0.299577				0.548039	1.0261	1.75228	0.0682934	0.121153
	0.730991		0.121635	1.47595	0.38354				0.626737	0.718693	1.10949	0.0684951	0.121254
	1.41189		0.0981854	1.13952	0.184598				1.4151	0.878607	1.95791	0.0713197	0.1266
	1.0587			0.780009	0.543143				0.855153	0.904854	1.53167	0.0757582	0.128012
	1.23844			1.07393	0.6581				0.495879	1.12035	1.45421	0.0765653	0.13467
	0.786649			1.08166	0.81202				1.35865	1.20662	2.20213	0.0790872	0.151315
	1.12513			0.644463	0.627245				0.6288	1.45379	2.37847	0.0851398	0.154644
	0.756366			1.03909	1.27574				1.79524	0.8649	4.03227	0.0864511	0.15888
	0.844894			0.455268	1.09657				0.923367	0.889711	3.62751	0.0972449	0.163924
	1.23844			1.35043	0.461002				0.90625	0.879894	0.952391	0.0979511	0.166144
	0.786649			0.656582	0.370744				1.25754	0.716099	1.16004	0.100473	0.173306
	1.12513			2.30745	0.746054				0.766023	0.861923	1.85505	0.101583	0.186521
				1.25227	0.483483				0.692017	0.912364	1.39131	0.103802	0.186621
				1.62722	0.357387				0.882214	1.81847	1.04255	0.104508	0.204981
				1.2045	0.711024				0.994729	0.921139	1.96816	0.109653	0.215371
				1.36765	0.299342				0.909778	1.01621	2.28873	0.110662	0.224349
				0.340739	0.0553191				1.33768	1.38785	0.86621	0.112175	0.230906
				1.10398	0.138461				1.15265	1.29958	1.27145	0.113587	0.23938
				1.0196	0.367505				1.72205	1.01429	1.51144	0.115201	0.247147
				0.627202	0.277199				1.05845	0.9365	0.982552	0.115504	0.250779
				1.4586	0.0748722				0.626057	1.36823	1.03139	0.115907	0.256832
				0.54745	0.602608				0.516857	1.27937	1.09166	0.119337	0.266818
				0.773431	0.285287				0.553304	0.878245	1.07571	0.127811	0.27045
				0.882225	0.06877				1.22981	1.02814	0.961641	0.130736	0.28195
				1.00836	0				0.963602	1.40702	1.03299	0.132249	0.292844
				0.504911	0.302249				1.53495	1.15781	1.38349	0.132249	0.297787
				0.716452	0.0533455				0.776823	1.38295	1.47615	0.135477	0.310397
				0.639073	0				0.907742	1.34526	0.863779	0.143749	0.314533
				1.13969	0				0.590215	1.9196	0.838543	0.145262	0.324621
				1.57719	0.101727				1.01433	0.847092	0.890076	0.145565	0.324721
				0.754756	0.349644				2.40454	0.804637	0.768621	0.146473	0.335616
				0.375883	0.0960571				0.971397	0.89852	0.732276	0.148995	0.354581
				1.34618					0.64928	1.19762	0.840871	0.150205	0.360129
				1.29524					0.713859	1.07025	1.42838	0.152223	0.362046
				1.35972					1.04356	1.27519	1.30648	0.153736	0.365173
				0.334875					0.569885	1.17525	1.56606	0.15888	0.365576
				0.5547					0.565046	0.841458	2.32665	0.163622	0.366182
				0.678295					0.821368	1.11988	1.21636	0.166144	0.371932
									0.62094	2.03548	1.78898	0.166547	0.38444
									0.717471	0.782226	1.3616	0.167051	0.388677
									0.744897	1.0526	1.23439	0.171187	0.390392
									0.851848	2.04644	1.36663	0.171591	0.407339
Average	1	0.700557	0.340345	1	0.393216				1.22018	1.6057	1.24847	0.175424	0.411273
SEM	0.0668899	0.108391	0.0625361	0.061472	0.0434384				1.33726	1.12934	1.57648	0.180065	0.425094
N	25	14	16	51	45				0.970761	1.2049	1.67304	0.1841	0.458585
TTEST		0.0276714	1.31931e-08		3.57082e-12				0.992412	1.09219	1.00559	0.185915	0.461006
									0.926093	1.11514	0.887733	0.18763	0.468672
									1.62858	1.57519	0.841736	0.189244	0.470286
									1.3852	1.03187	0.872778	0.196709	0.480576
									0.916518	1.83072	1.37005	0.200442	0.485216
									0.726054	0.996628	2.0659	0.205385	0.49258
Mitoflash									1.24305	1.4687	2.21456	0.209722	0.497119
Average	1	0.700557	0.340345	1	0.393216				0.875714	0.826424	1.55419	0.214665	0.497624
SEM	0.0668899	0.108391	0.0625361	0.061472	0.0434384				1.17791	0.965019	1.62951	0.217288	0.500448
N	25	14	16	51	45				1.53544	2.30987	3.02308	0.218902	0.506299
TTEST		0.0276714	1.31931e-08		3.57082e-12				0.738234	0.979482	2.65008	0.222634	0.511646
									0.671773	1.38353	0.799844	0.231512	0.538781
ATP									0.712343	1.92382	1.17215	0.231915	0.540395
Average	1	1.18476	1.45812	1	1.61186				1.29203	1.68705	0.805741	0.234639	0.567027
SEM	0.02806	0.0315049	0.0392377	0.0449686	0.058173				0.61331	1.57581	2.41484	0.238976	0.571062
N	364	300	318	488	448				0.607025	1.71573	1.51085	0.240893	0.577518
TTEST		1.39247e-05	5.32985e-20		3.39314e-16				0.663175	1.45467	1.53206	0.249669	0.582057
									1.71993	1.3891	1.13312	0.251384	0.586395
									1.22951	1.29316	1.01704	0.25431	0.587706
									0.644533	1.23274	1.43191	0.254713	0.593557
									1.27445	2.11004	2.17157	0.256025	0.594062
									1.00671	0.995083	1.22662	0.262581	0.608083
									0.959485	1.00214	1.14984	0.265406	0.619382
									0.782776	1.90121	0.910148	0.266516	0.620491
									0.975814	2.49428	0.880604	0.266617	0.622408
									0.763363	1.29102	1.05845	0.273577	0.62261
									0.81806	0.938024	0.944798	0.277108	0.627956
									1.13553	0.831425	1.64818	0.28084	0.653982
									0.994028	0.822179	1.94446	0.281143	0.679302
									0.541402	2.1008	1.98192	0.282656	0.690701
									0.896555	2.23557	2.89138	0.286792	0.701999
									0.631578	0.763528	2.46203	0.288204	0.702605
									2.2232	0.699291	1.5485	0.289919	0.70664
									1.18705	1.43717	1.86887	0.295871	0.711684
									1.3656	2.13219	1.50559	0.296577	0.718846
									1.58376	1.39132	1.28577	0.296678	0.721166
									1.18381	1.13872	0.899499	0.299805	0.722679
									0.576961	0.834899	1.21379	0.300511	0.747495
									0.956265	0.978173	1.87263	0.308077	0.755565
									1.41012	1.54144	1.43975	0.317257	0.763635
									0.594153	1.87007	1.77325	0.318467	0.763635
									0.803483	0.874715	2.0179	0.324217	0.781894
									0.725629	0.843317	1.07012	0.327344	0.797227
									0.997344	0.956135	1.1183	0.327445	0.812157
									1.9476	1.15811	1.24234	0.332792	0.817503
									0.814191	1.30352	1.59178	0.335515	0.831525
									1.52057	0.884031	2.32647	0.33955	0.853819
									0.96286	1.16802	0.934508	0.341971	0.866025
									1.44551	1.38705	2.02944	0.344191	0.868244
									0.832461	2.34745	1.66302	0.348226	0.888924
									0.999229	0.995895	0.972736	0.356598	0.913033
									0.970293	1.13281	0.627011	0.361642	0.932906
									0.562144	1.24809	0.898941	0.369511	0.933007
									1.04992	1.43645	1.01479	0.369914	0.94148
									0.799322	1.34895	0.888347	0.376269	0.977291
									0.604961	1.46524	1.48731	0.377883	0.984756
									0.592792	0.923678	1.40001	0.380708	0.994642
									0.75958	0.674739	0.678508	0.381111	1.00826
									0.846657	0.747156	1.11394	0.383734	1.04407
									0.958487	0.867039	1.0557	0.391199	1.04629
									1.22715	1.47387	1.28498	0.395335	1.05537
									0.670597	0.860074	1.02415	0.396344	1.0814
									0.978257	1.1121	1.49716	0.399168	1.08271
									0.825362	2.02785	1.22329	0.401388	1.08412
									0.589113	0.886949	1.10448	0.404716	1.10581
									0.771597	0.83896	0.978221	0.41662	1.12619
									1.584	1.23364	1.08158	0.422672	1.14364
									1.04976	1.41581	0.69678	0.42358	1.15867
									0.79608	1.40264	1.02097	0.424993	1.1744
									1.12173	1.10301	0.759677	0.430238	1.23715
									0.765742	0.788959	1.12734	0.430642	1.24502
									0.647913	1.86335	1.10832	0.435484	1.27185
									0.548039	1.61935	1.23974	0.445874	1.29283
									0.626737	1.00224	1.15044	0.451725	1.29425
									1.4151	2.75715	0.756179	0.457979	1.31119
									0.855153	1.57415	1.84633	0.460199	1.31482
									0.495879	1.75744	1.91824	0.465242	1.37041
									1.35865	1.46318	1.3803	0.467865	1.37404
									0.6288	1.07232	0.89219	0.473615	1.37505
									1.79524	1.06702	1.0241	0.487536	1.37787
									0.923367	1.46121	1.00058	0.48794	1.39442
									0.90625	1.03855	0.91652	0.48804	1.4162
									1.25754	1.06575	0.78547	0.489049	1.42609
									0.766023	1.11343	1.68132	0.491672	1.42922
									0.692017	0.992301	1.00055	0.500448	1.45716
									0.882214	1.72735	0.991646	0.503475	1.45726
									0.994729	1.35296	1.67796	0.506501	1.52031
									0.909778	1.29397	1.18392	0.511545	1.54159
									1.33768	1.46514	1.91363	0.513159	1.57922
									1.15265	1.05989	2.48683	0.519615	1.60353
									1.72205	1.15796	3.35933	0.522338	1.64358
									1.05845	1.56082	1.33904	0.527685	1.65407
									0.626057	1.19123	1.59601	0.528694	1.67929
									0.516857	1.59664	2.51192	0.530106	1.69826
									0.553304	1.14011	2.44134	0.53061	1.75707
									0.816792	1.1621	1.37094	0.535352	1.77058
									1.33688	1.1464	2.23735	0.536562	1.8299
									0.930316	0.845217	0.818252	0.551794	1.84765
									0.685522	0.806233	0.948249	0.554115	1.85764
									0.661767	0.733839	1.74759	0.556031	2.01501
									0.643881	0.952541	1.60177	0.556939	2.08925
									1.31459	1.1983	2.89956	0.563597	2.10993
									1.57967	1.10675	1.83445	0.566623	2.14463
									0.866913	0.677912	1.47324	0.567329	2.15644
									1.27709	0.739304	1.03427	0.569952	2.20556
									0.726097	0.887852	1.13585	0.575198	2.21404
									1.43813	0.883687	2.12923	0.576913	2.21464
									0.866221	0.925456	1.30162	0.580847	2.53563
									0.789181	1.61253	1.24454	0.581956	2.61744
									1.14424	0.774105	1.88577	0.587202	2.64306
									1.02002	0.76795	1.97476	0.606268	2.74213
									1.32004	0.953028	1.33474	0.647022	2.76422
									1.17977	0.960806	1.04057	0.65368	2.85591
									0.65339	0.508661	0.717883	0.664171	2.99069
									0.600465	2.17334	2.54324	0.681622	2.99734
									1.73488	2.74358	1.27641	0.682329	3.07683
									0.656911	1.66575	1.07149	0.706035	3.33235
									0.633768	0.464416	1.16869	0.721267	3.45764
									1.3049	1.58112	1.43289	0.727925	3.62812
									1.99646	0.342302	0.634805	0.733776	3.99017
									1.17763	0.316624	0.668939	0.737104	4.00086
									1.1815	0.247812	1.40273	0.737205	4.05776
									1.16133	0.659969	0.949851	0.744368	4.31751
									0.889516	0.779915	1.47856	0.765249	4.36805
									1.18869	1.52147	0.403719	0.778161	4.54792
									1.17329	0.812024	1.97796	0.789762	5.45732
									0.787305	1.0782	1.12245	0.793293	5.6975
									0.924601	0.501162	1.07161	0.798538	5.91035
									0.79605	1.10863	1.20988	0.8056	6.02475
									0.919143	0.995909	1.99836	0.820832	6.17566
									0.968698	1.66149	1.58465	0.853314	0.0589119
									1.15841	1.74118	1.1433	0.863099	0.109754
									0.984986	1.501	1.76391	0.864713	0.117017
									1.099	1.39032	1.54213	0.878332	0.15535
									1.28606	0.594958	1.58317	0.881358	0.158275
									1.34311	0.386415	1.72162	0.922717	0.1957
									0.787497	1.79393	1.71609	0.928467	0.199937
									0.782323	1.37778	1.40953	0.93573	0.212849
									1.06028	1.03115	0.63085	0.943397	0.215876
									1.27256	0.106129	1.9493	0.956914	0.2302
									0.823155	1.40482	1.07265	0.965186	0.232621
									0.921399	0.265161	1.70954	0.970634	0.240691
									0.803884	1.82888	1.57487	0.989901	0.273476
									0.787392	0.0700791	1.16249	1.00382	0.278722
									0.625326	1.31644	1.20059	1.00685	0.295972
									0.602114	3.15035	1.57677	1.02057	0.309388
									1.38	1.61594	2.58901	1.02975	0.339046
									2.18611	1.64215	2.36731	1.03509	0.34984
									1.26292	1.17344	1.65685	1.04004	0.370519
									1.25997	2.51187	1.63507	1.04841	0.393217
									0.377901	0.394655	1.24171	1.06112	0.39473
									0.532261	0.327022	1.36485	1.06949	0.396243
									1.43167	1.2348	2.05526	1.0703	0.436493
									1.20466	0.546248	1.04516	1.07635	0.439922
									0.11464	1.74785	2.44964	1.08573	0.470185
									0.362501	2.19841	1.11893	1.09279	0.478054
									1.84212	0.795391	1.56349	1.09703	0.501558
									0.876935	1.61062	1.55977	1.1282	0.533435
									1.58052	1.95745	1.0496	1.13052	0.538176
									0.121271	1.7217	2.69978	1.1389	0.575601
									1.42618	1.20153	2.20818	1.14081	0.578728
									1.49029	0.528661	2.35439	1.15786	0.585487
									0.248042	0.867488	1.6524	1.16462	0.607882
									0.251429	0.179156	1.11872	1.17602	0.641373
									0.559646	0.186071	1.59104	1.1967	0.65832
									3.03913	1.25272	1.04968	1.20467	0.663364
									0.753452	1.9105	1.92908	1.23786	0.674561
									2.86233	0.21075	1.86689	1.25743	0.676478
									0.495419	0.207483	0.355211	1.29626	0.679302
									1.52753	1.48746	3.2706	1.30171	0.72742
									0.310838	0.407564	2.13517	1.30817	0.743863
									0.658803	0.916556	0.292115	1.32733	0.749512
									0.366578	0.624753	2.1349	1.33772	0.753446
									1.47023	1.96518	3.22195	1.35013	0.796319
									1.97151	1.12359	2.40803	1.35649	0.822547
									1.69733	1.9685	2.80291	1.36516	0.832433
									1.11921	0.308955	2.18036	1.39119	0.83788
									0.310926	0.304384	0.578831	1.44677	0.848169
									0.321118	0.933886	2.3261	1.48601	0.853919
									0.369895	0.584036	0.739393	1.50498	0.856845
									2.03519	1.90481	0.2602	1.52788	0.859569
									0.776526	0.283457	1.55114	1.53635	0.86209
									0.517891	1.17295	1.7808	1.55027	0.886099
									0.888944	0.567364	0.403699	1.55239	0.905972
									3.61897	1.91551	1.834	1.56127	0.90698
									0.864946	1.31471	2.56935	1.64419	0.922213
									1.5771	2.83385	1.39361	1.66628	0.927055
									0.0919828	1.30792	2.24217	1.6684	0.966397
									0.979729	1.40376	0.268371	1.67031	0.977796
									0.861454	0.939773	2.06888	1.70663	0.98405
									0.480089	1.16539	2.14837	1.70693	0.999081
									1.00628	1.53668	0.0873408	1.72055	1.03025
									1.02775	0.491939	1.97131	1.74658	1.0587
									0.203791	0.544196	1.97228	1.76251	1.06546
									1.66255	1.51196	0.802189	1.78067	1.08856
									0.376489	0.760048	1.52415	1.79328	1.09027
									1.52689	1.47205	2.54433	1.82304	1.09461
									1.62457	1.09339	1.31905	1.84957	1.09814
									0.469342	0.955298	1.8659	1.85643	1.11065
									0.676851	1.00504	1.7173	1.88054	1.1274
									0.415762	0.995139	1.51952	1.89224	1.14747
									1.88817	1.76763	3.56872	1.93753	1.17854
									2.71951	1.28641	0.549741	2.00421	1.19882
									1.07019	0.131147	0.543926	2.0138	1.22343
									0.258675	0.57829	0.238506	2.02651	1.24552
									0.483573	1.76427	0.250282	2.0367	1.24956
									0.425801	1.15377	1.57931	2.05082	1.26983
									2.30424	0.733929	0.952973	2.05163	1.27962
									2.16135	1.59402	2.15148	2.06787	1.28022
									1.56773	1.36486	0.443004	2.07977	1.28436
									0.600741	0.28463	2.14351	2.13697	1.34226
									2.75057	1.71443	2.72487	2.14312	1.34599
									0.775349	1.9026	0.327063	2.20708	1.35961
									2.028	0.666469	2.0328	2.42679	1.37888
									1.08413	0.263335	0.461689	2.44222	1.38049
									2.10663	0.41575	1.97387	2.44878	1.39109
									1.52106	0.853946	1.03272	2.49427	1.4269
									0.360019	0.403547	1.47568	2.53321	1.44132
									1.10614	1.59899	0.451037	2.61119	1.44758
									0.453281	1.86652	1.13625	2.6124	1.44909
									0.857133	1.81559	0.350574	2.64791	1.4499
									0.323065	1.56424	1.68866	2.66253	1.45151
									0.951775	1.91082	2.03668	2.71368	1.46816
									0.279069	2.10283	1.0407	2.76018	1.47138
									0.437523	0.77082	1.04526	3.09065	1.47915
									0.589429	0.157166	3.02117	3.18275	1.48974
									1.04812	0.0236657	2.58955	3.62994	1.50931
									2.32208	0.233375	0.853101	3.81928	1.51093
									1.51927	0.33736	0.185021	3.9014	1.51174
									0.160897	1.1605	0.298699	3.99007	1.52878
									0.921114	1.97193	2.66749	4.00449	1.53504
									1.19086	0.725926	2.99207	4.14522	1.53595
									2.42917	1.16452	0.87036	4.4081	1.53685
									1.87231	0.864209	2.08506	7.53779	1.5424
									1.55841	0.959252	1.25305	0.0229998	1.54412
									0.85294	0.690306	2.91634	0.0236051	1.55461
									2.02445	1.75643	1.49583	0.0254209	1.56742
									0.130943	1.62544	0.24982	0.026934	1.58558
									0.0968753	1.43733	1.56266	0.033491	1.59052
									1.40107	0.177536	0.47461	0.0338945	1.59677
									0.672227	0.179732	0.0109586	0.0413594	1.60212
									0.563148	0.666614	0.122886	0.0511444	1.63349
									0.748781		0.365048	0.0593154	1.64055
									0.298104		0.286255	0.0672846	1.64237
									0.30877		1.48851	0.0772714	1.64419
									1.35047		2.48249	0.0821135	1.64439
									0.495419		1.56746	0.0844336	1.67283
									0.612164		0.961312	0.1036	1.67848
									1.1856		2.2326	0.109754	1.68212
									1.39519		2.04256	0.116311	1.68655
									1.24747		2.14006	0.128517	1.68726
									0.959471		3.38854	0.131442	1.71228
									0.165831		1.87394	0.138907	1.7151
									0.415922		0.949563	0.145666	1.73497
									0.472006		0.610607	0.154543	1.73619
									0.483331		1.75211	0.154745	1.74758
									2.25875		1.77725	0.157266	1.77795
									0.697798		0.433461	0.160797	1.79167
									0.127027		0.322022	0.178148	1.81709
									0.453407		0.152748	0.194389	1.82718
									1.16421			0.194994	1.8295
									0.140972			0.195902	1.86299
									2.08243			0.198828	1.86732
									1.54542			0.19913	1.87661
									1.11288			0.204578	1.87913
									1.09087			0.214463	1.89688
									0.781593			0.215775	1.90969
									0.721877			0.220314	1.92674
									0.487399			0.220617	1.92997
									1.25772			0.229494	1.9341
									2.18153			0.230604	1.93673
									1.58896			0.232823	1.93965
									1.75723			0.237261	1.945
									0.105776			0.238775	1.99211
									0.131229			0.240389	2.0371
									1.71682			0.245634	2.06888
									0.264546			0.246946	2.07906
									0.981685			0.260766	2.08088
									0.821034			0.262884	2.10892
									0.384966			0.276099	2.11952
									1.01796			0.277108	2.12385
									1.02163			0.27741	2.12829
									1.28238			0.288608	2.13243
									1.22132			0.294963	2.13677
									0.923244			0.313726	2.17127
									0.467369			0.315945	2.17954
									0.438399			0.324923	2.18176
									1.45239			0.32805	2.23774
									1.29705			0.351555	2.24934
									1.07294			0.356901	2.25237
									0.441736			0.357809	2.25237
									2.25693			0.371225	2.25923
									0.390275			0.380607	2.28384
									0.488015			0.387164	2.29151
									0.60671			0.389383	2.30271
									0.507309			0.390796	2.30563
									0.66805			0.398967	2.34911
									1.54392			0.40048	2.36676
									0.803325			0.405523	2.36888
									0.244831			0.417931	2.38028
									0.8833			0.41894	2.3822
									2.17672			0.441234	2.40722
									0.331992			0.441637	2.40742
									0.169587			0.445874	2.40954
									0.959234			0.449304	2.42699
									1.69171			0.45344	2.43052
												0.45697	2.44293
												0.462922	2.44383
												0.490562	2.44646
												0.491369	2.4513
												0.498532	2.46007
												0.523347	2.47198
												0.536865	2.47843
												0.560974	2.52706
												0.600619	2.5439
												0.606167	2.56549
												0.60879	2.59444
												0.630175	2.59464
												0.641373	2.613
												0.644399	2.62006
												0.645004	2.62692
												0.691609	2.62803
												0.73085	2.64004
												0.73892	2.65063
												0.765451	2.66021
												0.779977	2.66435
												0.798639	2.67111
												0.885393	2.67686
												0.948844	2.67999
												0.979712	2.68584
												0.980116	2.68967
												0.987278	2.69401
												1.05184	2.7392
												1.06969	2.80689
												1.07968	2.81173
												1.10752	2.81395
												1.10752	2.81748
												1.12134	2.82343
												1.15191	2.82434
												1.17723	2.83029
												1.17894	2.89909
												1.18308	2.89959
												1.25561	2.91392
												1.26176	2.96274
												1.26398	2.97021
												1.27518	2.99805
												1.29152	3.00118
												1.29193	3.00259
												1.30373	3.00309
												1.31321	3.00582
												1.32764	3.01369
												1.35376	3.02922
												1.36506	3.04314
												1.38524	3.07381
												1.39462	3.08591
												1.41308	3.10306
												1.43315	3.11275
												1.46957	3.11557
												1.47592	3.1185
												1.54149	3.12334
												1.55582	3.22512
												1.57519	3.2458
												1.62905	3.35243
												1.64005	3.37361
												1.66698	3.37563
												1.67273	3.39802
												1.67334	3.43838
												1.68101	3.45522
												1.69926	3.4993
												1.70451	3.56558
												1.71601	3.68532
												1.75152	3.72093
												1.761	3.75987
												1.77643	3.96747
												1.77664	4.01105
												1.87176	4.10355
												1.87237	4.10749
												1.876	4.14612
												1.88296	4.18113
												1.92543	4.19374
												2.01652	4.22471
												2.03155	4.42041
												2.095	4.43725
												2.14746	4.44855
												2.15785	4.59533
												2.16098	4.73444
												2.18176	5.03273
												2.18811	5.04433
												2.19578	5.05028
												2.19719	5.10052
												2.21969
												2.22887
												2.27396
												2.3367
												2.37645
												2.39319
												2.39531
												2.42598
												2.43173
												2.44434
												2.45523
												2.46845
												2.47995
												2.48338
												2.53271
												2.53311
												2.53957
												2.54895
												2.5896
												2.59596
												2.61068
												2.63731
												2.65991
												2.68584
												2.70924
												2.75151
												2.83372
												2.86873
												2.91089
												2.91866
												2.92108
												2.99674
												3.07532
												3.23854
												3.25801
												3.27889
												3.54238
												3.59494
												4.1661
												5.84963
								Average	1	1.18476	1.45812	1	1.61186
								SEM	0.02806	0.0315049	0.0392377	0.0449686	0.058173
								N	364	300	318	488	448
								TTEST		1.39247e-05	5.32985e-20		3.39314e-16

## Sheet: Figure 4C and 4D
	5.6 mM glucose
	Mitoflash(fold change)							ATP (fold change)
	control	mitoTEMPO	SS31	LacZ	SOD2 OE			control	mitoTEMPO	SS31	LacZ	SOD2 OE
	1.23129	0.476047	0	0	1.19888			0.855422	1.12067	2.2479	0.00951898	0.0272321
	0	0.400679	0.891129	0.339121	0			0.864856	1.23387	1.4575	0.0130027	0.074091
	0.216686	1.25599	0	1.2462	0.373721			1.5163	0.924519	2.41518	0.0215404	0.0791449
	1.05816	0.399933	0.455079	1.8006	0.532943			0.638738	0.738142	1.52711	0.0260055	0.0898906
	1.56799	0.638071	0	0.508811	0.943969			0.936648	0.592482	1.19471	0.0323842	0.104905
	3.0404	0.890591	0.35937	1.22604	0			0.792154	1.23897	1.32777	0.0330711	0.108536
	0.222539	0.982009	0.345623	2.4884	0			1.0266	1.72118	1.05238	0.0343468	0.146906
	0	0	0.840252	1.6859	0			0.881896	1.39897	0.792518	0.0404802	0.157309
	0.245293	0.3139	0.760884	1.55922	0			1.37825	1.21202	0.937474	0.042541	0.168839
	0.618455	0.914402	0.390846	1.80895	2.2576			0.637425	1.45237	0.416402	0.0530413	0.169624
	0.596621	0.937395	0	1.40215	0.353025			0.992306	1.61969	0.602026	0.0618734	0.187779
	2.88484	0.436517	0	1.87177	0.311551			0.559309	1.92218	1.29224	0.0681049	0.190085
	2.30983	0	0.985356	0.248029	0.590892			1.11304	0.637148	0.883226	0.0798809	0.190576
	0.231203	0.570787	0.496963	0.304399	0.296238			1.07846	1.07757	1.07263	0.0811567	0.199702
	1.3389	0.268967	0.979613	2.71435	0.341215			0.745655	1.87922	2.69084	0.0815983	0.2314
	0.43726			0.958989	0			1.68872	0.668376	0.782411	0.082874	0.253333
	1.1878			0.324513	0			0.72347	0.657235	1.10241	0.085818	0.262851
	1.14092			0	0.418284			0.771227	0.847025	1.3489	0.0902341	0.27031
	1.40157			0.345483	0			0.90411	0.711553	2.64133	0.0921967	0.272567
	0.660772			1.56456	0			1.01586	0.779848	2.18688	0.0980357	0.280859
	0.291789			3.08005	0			1.198	0.694074	1.30794	0.099704	0.281889
	0.936278			0	0.483575			0.949723	0.678713	1.24732	0.104218	0.291507
	1.0051			0.941735	0.319509			0.810059	1.04602	0.897514	0.105592	0.351074
	1.53712			0.68243	0			0.906201	2.06152	0.885845	0.108487	0.356667
	0.718541			1.38409	0			0.749848	0.576841	0.592535	0.110989	0.37492
	1.89991			0.500741	0.406487			0.680819	0.513666	1.11873	0.11992	0.394105
	0.486535			1.65538	1.05682			0.469249	0.506126	0.655587	0.120705	0.39808
	1.68604			0.270715	0			1.41252	0.610045	0.491003	0.12252	0.440425
	1.48318			0	0			0.751739	0.793059	1.16704	0.124924	0.451661
	0.442581			0	0.670016			0.71894	0.956702	0.826659	0.127083	0.458383
	0.450453			0	0			0.585041	0.677553	1.16085	0.129635	0.462848
	0.671946			1.08389	0			0.944188	0.787705	2.32972	0.130224	0.482377
				0.863819	0			2.03567	0.514019	0.54796	0.142	0.491503
				1.1199	0			0.946871	1.16342	1.03666	0.143521	0.506174
				2.01974	0.426354			2.02335	1.1345	0.734905	0.158241	0.510443
				0	0.431067			0.884549	2.02461	1.18649	0.159075	0.511915
								0.622484	1.69131	0.928469	0.162902	0.514172
								0.666345	2.03781	1.33356	0.16354	0.514418
								1.08737	1.05263	0.843936	0.164521	0.517313
								1.0568	0.940834	0.83346	0.164718	0.523789
Average	1	0.565686	0.433674	1	0.317004			1.26459	0.777829	0.754979	0.167416	0.527813
SEM	0.137049	0.094901	0.0986571	0.141049	0.0777444			0.894106	0.986551	1.06717	0.173108	0.529776
N	32	15	15	36	36			1.06639	0.63012	0.666094	0.181597	0.547096
TTEST		0.0123992	0.00162994		0.000116814			2.50842	0.381754	1.37099	0.186405	0.557891
								0.694895	0.527503	1.43266	0.190036	0.567312
								2.1917	0.701139	1.74499	0.198623	0.585123
								0.771054	0.679012	0.706337	0.201076	0.586546
								0.787533	0.63933	1.43525	0.207062	0.594593
								1.27572	1.28525	1.02226	0.209467	0.598813
								1.86703	0.762478	1.01357	0.209614	0.607154
								0.900012	1.12041	1.28883	0.21246	0.621727
Mitoflash								0.641213	0.827842	0.985246	0.214521	0.634141
Average	1	0.565686	0.433674	1	0.317004			1.13077	1.00392	1.39749	0.219673	0.639833
SEM	0.137049	0.094901	0.0986571	0.141049	0.0777444			0.745479	2.11134	1.34135	0.221979	0.646309
N	32	15	15	36	36			0.855477	0.937898	0.845515	0.224187	0.671922
TTEST		0.0123992	0.00162994		0.000116814			0.838521	1.17738	0.690765	0.224187	0.686152
								0.772346	0.900221	1.69115	0.225021	0.688409
								0.675345	0.956146	0.527758	0.227818	0.702393
ATP								1.25207	1.04241	1.14871	0.229339	0.721725
Average	1	1.03192	1.10323	1	1.34402			0.598445	0.85448	1.92315	0.232037	0.723295
SEM	0.0348072	0.0443109	0.0497663	0.0344797	0.0364248			0.870012	0.810778	0.893576	0.235816	0.728497
N	146	99	99	531	413			0.988628	1.04521	1.34653	0.24401	0.730901
TTEST		0.571634	0.0908417		1.27846e-11			0.815981	0.684536	0.834437	0.244304	0.736887
								0.464447	1.62867	0.822144	0.249015	0.753913
								0.427228	1.59978	0.827118	0.249603	0.763285
								0.426013	0.703442	0.85704	0.249652	0.780262
								1.30264	0.797712	0.955143	0.25137	0.783599
								0.718267	0.814585	2.63505	0.254118	0.792872
								1.61299	0.956141	0.635057	0.257454	0.800036
								2.51796	1.56204	1.24487	0.259613	0.811861
								1.22515	1.07263	1.23542	0.260742	0.837474
								1.37937	0.920157	0.881643	0.265648	0.841792
								1.82937	0.676351	0.659401	0.268789	0.850183
								1.24962	2.30117	0.647498	0.269034	0.862793
								1.0679	1.49562	1.20673	0.276394	0.906708
								0.732888	0.941583	0.735997	0.276836	0.921624
								0.809404	0.846228	0.799402	0.27924	0.931339
								0.838812	0.912869	0.596674	0.280172	0.960534
								0.673874	1.27857	0.55465	0.280319	0.978296
								0.724095	0.697997	1.57897	0.283705	1.01112
								0.843577	1.20799	0.535827	0.284932	1.0147
								1.42311	0.745928	0.79026	0.29082	1.03335
								0.565678	2.04494	0.804194	0.298719	1.05769
								1.25108	0.927319	1.46131	0.306717	1.06819
								0.750441	1.97232	0.696331	0.313734	1.07771
								1.41235	1.05492	1.38367	0.314764	1.10685
								0.82145	0.609007	0.874821	0.316383	1.14051
								0.517745	0.895461	0.477261	0.320701	1.21975
								0.528704	1.01529	1.58079	0.327669	1.25709
								0.997532	1.55204	1.31484	0.328797	1.26082
								0.874133	0.699152	1.27158	0.330073	1.2697
								0.730981	0.767719	1.31751	0.333949	1.2752
								0.674577	1.66798	0.766669	0.334146	1.28418
								0.550503	0.792277	0.695127	0.338562	1.29075
								0.662031	0.622377	0.755723	0.346265	1.30523
								2.31499	0.616744	0.534289	0.346363	1.31421
								0.571502	0.678551	1.35138	0.347492	1.32942
								1.06696	0.607634	0.584685	0.347688	1.34301
								1.40281	0.739581	0.923529	0.348768	1.35523
								0.598905			0.349356	1.38511
								0.855086			0.352153	1.40945
								0.992508			0.362654	1.43138
								0.90538			0.363242	1.45464
								1.46287			0.375117	1.46121
								1.11056			0.379042	1.47083
								0.994491			0.398718	1.47211
								0.903647			0.403477	1.48634
								0.66148			0.410543	1.55297
								1.67589			0.412457	1.57838
								0.886481			0.417461	1.58049
								1.55328			0.420013	1.60841
								0.993158			0.425999	1.62819
								0.588093			0.427078	1.672
								1.56878			0.429483	1.67794
								1.17059			0.441161	1.6854
								0.548196			0.441259	1.71729
								0.931045			0.443761	1.73456
								0.749234			0.446901	1.74271
								0.985947			0.447883	1.75512
								0.919157			0.448668	1.76111
								0.907943			0.451219	1.76798
								0.51119			0.453624	1.77769
								0.720374			0.457206	1.78054
								0.92744			0.459119	1.79668
								1.09384			0.459414	1.82092
								1.34784			0.47011	1.85105
								0.574495			0.476194	1.85262
								1.17595			0.478942	1.86876
								1.37792			0.490031	1.87632
								1.12178			0.492632	1.94737
								1.0093			0.499452	1.95782
								1.76688			0.500875	2.03677
								0.965055			0.502838	2.04766
								1.35311			0.503132	2.05448
								1.33594			0.503672	2.1063
								0.521209			0.504359	2.10914
								1.02023			0.506665	2.11375
								1.13711			0.507008	2.12214
								1.87526			0.509462	2.12808
								0.551973			0.511768	2.12842
								0.658137			0.512995	2.17945
								1.65049			0.522906	2.18343
								0.449771			0.527126	2.19918
								0.64606			0.532621	2.2166
								0.565153			0.533554	2.22538
								0.69468			0.534044	2.27528
											0.535958	2.28058
											0.539834	2.2981
											0.541012	2.40904
											0.552935	2.41228
											0.560197	2.41478
											0.572218	2.46615
											0.577076	2.49088
											0.577812	2.49991
											0.578254	2.68161
											0.582179	2.74157
											0.596457	2.93852
											0.597144	3.01222
											0.603032	3.03749
											0.604799	3.14593
											0.622659	3.15854
											0.645819	3.2473
											0.6573	3.34013
											0.659263	3.38159
											0.661128	3.42448
											0.666819	3.44175
											0.666819	3.83468
											0.678743	3.95779
											0.679969	0.0881733
											0.687428	0.160989
											0.692923	0.25348
											0.697339	0.25505
											0.697732	0.268347
											0.701363	0.290378
											0.70151	0.304215
											0.712648	0.34126
											0.713433	0.341604
											0.714512	0.367315
											0.719566	0.374184
											0.72673	0.385372
											0.737917	0.391358
											0.745866	0.395332
											0.750871	0.424429
											0.752441	0.447245
											0.756759	0.447392
											0.781391	0.451072
											0.78929	0.460542
											0.79248	0.464958
											0.795718	0.472269
											0.799202	0.478452
											0.813431	0.484977
											0.82138	0.555781
											0.826385	0.582179
											0.836198	0.605191
											0.844785	0.607988
											0.862106	0.611472
											0.865491	0.612257
											0.865982	0.640814
											0.879475	0.652001
											0.882027	0.652394
											0.882763	0.653179
											0.892233	0.678301
											0.897777	0.683698
											0.900427	0.700577
											0.952683	0.703521
											0.965588	0.704748
											0.977217	0.712403
											0.978542	0.721725
											0.998217	0.728055
											1.00195	0.729919
											1.002	0.735513
											1.00214	0.741009
											1.0042	0.756317
											1.00877	0.757593
											1.03016	0.759311
											1.06043	0.773246
											1.06691	0.789438
											1.07761	0.795129
											1.08148	0.824324
											1.0835	0.845374
											1.09012	0.851655
											1.09782	0.856807
											1.10057	0.884824
											1.10229	0.887424
											1.10602	0.917895
											1.13129	0.926776
											1.13399	0.929377
											1.13875	0.938356
											1.15003	0.954303
											1.16058	0.966471
											1.16347	0.981682
											1.16961	0.985902
											1.1702	0.993458
											1.17152	0.995813
											1.20155	1.04311
											1.20204	1.0467
											1.20469	1.04895
											1.20842	1.05214
											1.2227	1.06279
											1.22368	1.07545
											1.24826	1.0807
											1.25572	1.08212
											1.26102	1.08703
											1.26804	1.10754
											1.27005	1.13369
											1.27024	1.14694
											1.27736	1.15312
											1.31156	1.15577
											1.32805	1.16897
											1.33241	1.1701
											1.33477	1.17285
											1.36583	1.18536
											1.37986	1.18727
											1.40042	1.19404
											1.41401	1.20145
											1.4197	1.20817
											1.43535	1.23766
											1.45508	1.24115
											1.4619	1.24237
											1.46215	1.24561
											1.4777	1.2465
											1.49109	1.25062
											1.49944	1.25866
											1.50508	1.27706
											1.51739	1.28173
											1.53653	1.28207
											1.54526	1.28315
											1.54782	1.28389
											1.55047	1.28467
											1.55169	1.28511
											1.56003	1.29272
											1.56308	1.29424
											1.5671	1.29488
											1.5778	1.30415
											1.58923	1.30606
											1.59261	1.32682
											1.59968	1.33889
											1.61813	1.34051
											1.6328	1.35106
											1.633	1.37284
											1.67519	1.37378
											1.71504	1.37682
											1.72357	1.38168
											1.74919	1.41254
											1.75076	1.41323
											1.7566	1.41646
											1.75875	1.41774
											1.79835	1.42108
											1.80954	1.42319
											1.90262	1.42348
											1.96214	1.44306
											1.97195	1.4434
											1.97931	1.44527
											1.99344	1.44816
											2.00674	1.45101
											2.01027	1.45636
											2.0984	1.45645
											2.1085	1.46892
											2.13652	1.47893
											2.13662	1.48177
											2.14751	1.48261
											2.18726	1.48393
											2.21939	1.48923
											2.23117	1.49036
											2.23622	1.49168
											2.26846	1.4933
											2.27543	1.50424
											2.29167	1.51411
											2.34221	1.53496
											2.36738	1.53501
											2.39496	1.53614
											2.63828	1.53736
											2.73818	1.5384
											2.85849	1.54041
											2.87164	1.5409
											3.08395	1.54605
											3.18076	1.54629
											3.37482	1.54777
											3.42654	1.55096
											3.51633	1.56229
											3.8284	1.56322
											4.03438	1.57706
											6.12802	1.5776
											0.0699694	1.58035
											0.084297	1.59443
											0.118251	1.60851
											0.126936	1.61023
											0.132824	1.61214
											0.144649	1.61504
											0.158731	1.6169
											0.173206	1.62627
											0.17404	1.63991
											0.177033	1.64325
											0.177132	1.64551
											0.200438	1.64786
											0.203579	1.64963
											0.208633	1.64973
											0.215698	1.65086
											0.234295	1.65503
											0.235374	1.6696
											0.251174	1.67009
											0.264176	1.67122
											0.269377	1.6722
											0.28184	1.69001
											0.289397	1.69629
											0.290427	1.70228
											0.300093	1.71268
											0.308778	1.71602
											0.311133	1.7275
											0.322075	1.72824
											0.331447	1.72912
											0.334342	1.74246
											0.338905	1.74276
											0.343616	1.76872
											0.347443	1.77779
											0.353478	1.78299
											0.353723	1.78952
											0.358483	1.79251
											0.360691	1.7931
											0.361476	1.80085
											0.367217	1.80115
											0.387874	1.82661
											0.394253	1.83442
											0.396608	1.8351
											0.402447	1.83628
											0.405146	1.83829
											0.413438	1.85188
											0.413978	1.85704
											0.423104	1.86798
											0.42595	1.88329
											0.455243	1.90507
											0.467313	1.91498
											0.470208	1.9169
											0.471827	1.93284
											0.486351	1.93922
											0.487872	1.9458
											0.488314	1.96484
											0.509167	1.97215
											0.509854	1.97607
											0.546605	2.01062
											0.55058	2.02308
											0.553916	2.07175
											0.555536	2.07175
											0.56319	2.07622
											0.563926	2.07744
											0.586399	2.085
											0.632963	2.09231
											0.636447	2.09359
											0.650382	2.1008
											0.653866	2.11542
											0.670107	2.14
											0.684827	2.1401
											0.690666	2.14025
											0.691745	2.18279
											0.69253	2.23564
											0.704846	2.26429
											0.705141	2.26851
											0.714463	2.33696
											0.72148	2.33794
											0.724424	2.35359
											0.724669	2.39294
											0.737966	2.40364
											0.752098	2.5006
											0.757103	2.53799
											0.777613	2.55609
											0.778447	2.56541
											0.785512	2.59795
											0.824619	2.65084
											0.829967	2.68489
											0.849741	2.75241
											0.857395	2.83528
											0.883891	2.94264
											0.935265	4.05293
											0.948758
											0.953714
											0.961515
											0.984871
											0.999052
											1.00204
											1.03021
											1.03276
											1.04095
											1.05621
											1.0677
											1.0702
											1.08354
											1.09934
											1.10734
											1.14233
											1.15253
											1.16691
											1.16706
											1.19193
											1.20724
											1.22878
											1.23658
											1.24208
											1.31651
											1.33192
											1.33855
											1.35547
											1.35798
											1.36843
											1.3725
											1.40562
											1.43006
											1.43084
											1.44139
											1.44679
											1.45047
											1.45385
											1.45881
											1.46862
											1.47157
											1.51072
											1.52063
											1.52834
											1.53314
											1.56553
											1.57196
											1.58099
											1.60189
											1.60331
											1.6194
											1.62662
											1.6406
											1.64512
											1.68339
											1.68996
											1.69129
											1.69345
											1.69438
											1.70797
											1.77097
											1.77455
											1.7775
											1.78005
											1.78103
											1.78432
											1.78687
											1.79227
											1.79879
											1.80458
											1.81906
											1.82539
											1.8324
											1.85964
											1.86013
											1.86444
											1.89639
											1.92308
											1.92328
											1.93981
											1.9456
											1.94698
											1.94923
											1.96798
											1.97406
											1.97637
											2.0274
											2.04153
											2.05119
											2.05149
											2.05855
											2.0796
											2.09158
											2.09187
											2.10011
											2.12455
											2.19481
											2.21689
											2.21895
											2.22646
											2.26738
											2.30222
											2.31988
											2.33931
											2.35453
											2.37979
											2.39864
											2.40624
											2.45761
											2.47278
											2.52302
											2.60835
											2.66399
											2.71276
											2.78165
											2.78327
											2.81291
											3.54847
							Average	1	1.03192	1.10323	1	1.34402
							SEM	0.0348072	0.0443109	0.0497663	0.0344797	0.0364248
							N	146	99	99	531	413
							TTEST		0.571634	0.0908417		1.27846e-11
