# Supplementary material for: Mitochondrial flashes regulate ATP homeostasis in the heart
Source: eLife. 2017 Jul 10;6:e23908. doi: 10.7554/eLife.23908 (PMC5503511; doi:10.7554/eLife.23908)
Supplement: Figure 5—source data 1. — This file contains raw source data used to make the graphs presented in Figure 5A, Figure 5C–5G, Figure 5—figure supplement 1A–D, Figure 5—figure supplement 2A–C, Figure 5—figure supplement 3, Figure 5—figure supplement 4A–C, and Figure 5—figure supplement 5. Excel software was used to graph all the quantitative data and perform statistical analyses. Student’s t-test was applied to determine the statistical significance. DOI: http://dx.doi.org/10.7554/eLife.23908.014 [file elife-23908-fig5-data1.xlsx]

## Sheet: Figure 5A
	Glucose			Pyruvate
	Control	50 uM genipin		Control	50 uM genipin
	7.76267	2.43403		43.5696	38.203
	3.29868	4.44881		29.1401	32.7954
	4.41224	4.10741		23.9711	32.9608
	2.87961	8.24343		26.6388	31.0254
	2.61001	3.98452		37.824	30.1241
	5.54044	8.79013		23.58	47.4807
	2.41409	2.49188		36.5251	46.6171
	3.28596	5.0424		31.5492	45.9948
	1.05964	3.21874		20.5486	33.1077
	2.00912	2.0881		25.02	39.4143
	4.048	5.77994		20.2948	62.7597
	7.67027	7.72729		21.2674	33.3276
				32.1733	63.7124
				60.943	37.395
				29.2874	51.9925
				29.189
				51.2859
				28.1526
				50.6285
				26.5038
				34.5929
				25.6926
				21.3859
Average	3.91589	4.86306		31.7289	41.794
SEM	0.611768	0.670633		2.25246	2.83971
N	12	12		23	15
TTEST		0.308179			0.00941249

## Sheet: Figure 5C
	Control		UCP2-siRNA-1		UCP2-siRNA-2		UCP2-siRNA-3		50uM genipin
	8.8241		5.86027		12.9361		10.7353		15.1134
	9.49037		7.48104		3.53745		30.7567		10.4668
	20.9589		10.1948		12.1219		11.0337		9.72824
	8.30333		3.28158		9.50233		18.7483		12.2712
	5.19956		13.7717		9.9155		15.782		12.8681
	5.67341		6.80734		15.5125		8.46003		18.8567
	3.04979		19.7739		2.46695		14.7109		9.26841
	14.3182		9.24087		9.18522		12.2198		14.1715
	5.97253		6.29522		12.4707		7.25486		14.5145
	4.73477		9.72585		32.3446		16.0356		21.6603
	3.97931		9.823		2.27786		10.4009		12.7719
	9.15471		20.6517		0.456661		11.6463		20.1542
	14.927		19.5068		15.7909		12.2113		18.3726
	4.79853		11.5881		30.6702		10.1266		13.7229
	4.65059		20.9859		8.53044		4.38032		13.1573
	8.65432		21.08		21.1896		5.64744		22.2125
	7.78257		11.7396		12.0433		8.6028		18.8385
	4.4686		10.9254		24.9048		16.4141		10.1417
	8.00843		9.16784		17.5903		26.2102		18.5375
	9.45877		17.8924		18.702		22.5188		27.0304
	5.08545		10.5295		7.15538		10.7413		26.1499
	6.35707		20.365		5.85239		6.53919		5.31795
	5.70672		18.7039		18.9615		18.1344		5.71645
	18.1619		18.2731		7.31502		12.9913		3.82616
	14.9503		11.1208		5.96771		24.741		4.77787
	6.77676		10.2316		2.51824		9.79847		17.5106
	12.1782		5.64996		12.9202		7.15268		15.3039
	8.09125		3.31251		14.6306		9.17129		3.15268
	3.40686		19.1818				13.1056
	9.8301
	6.35706
	10.3593
	7.33857
	7.96035
	10.4575
	6.68172
	9.29274
	3.35471
	4.00085
	4.27765
	5.26951
	3.08276
Average	7.89012		12.5228		12.4096		13.3197		14.1291
SEM	0.627266		1.07381		1.54273		1.18518		1.21062
N	42		29		28		29		28
TTEST			0.000525691		0.0101408		0.000207665		4.25588e-05

## Sheet: Figure 5D
	5.6 mM glucose				10 mM pyruvate
	Control	ABT	Bcl-xL OE		Control	ABT	Bcl-xL OE
	1.04387	3.45257	0		22.89	49.7513	17.3815
	5.86035	3.33621	5.39022		23.6019	62.537	8.45899
	4.82416	14.5735	0.886528		44.2679	66.3752	13.7903
	4.79785	3.22659	1.02862		48.8785	51.7816	17.6902
	0.863509	12.1802	1.80648		55.0483	64.8624	15.7154
	0.971922	4.3745	1.0056		44.7982	49.1239	19.0045
	1.70112	4.51181	2.39889		26.2657	69.4462	22.3582
	4.91087	23.6148	1.71996		56.3487	41.8901	14.1887
	2.30129	5.9818	0		44.3778	54.7463	44.9948
	7.98879	4.64851	0.807296		29.2194	50.806	18.627
	2.71591	6.55836	0		29.195	51.983	23.5969
	6.67086	1.64571	0.789658		33.5569	70.6769	14.2123
	0.867668	7.06023	2.63316		44.628	51.2904	4.38101
	0.873165	3.07429	2.39788		42.4266	41.6527	11.9704
	4.96119	1.78445	2.67816		42.2107	50.5969	27.2932
	1.30085	1.80645	0.829226		44.5566	46.1454	20.9765
	1.79413	3.83619	0.791829		34.8542	44.2599	15.5273
	0.907252	3.7069	2.49767
	2.88818	16.1927	2.28223
	0.832164	3.5851	0.895599
	2.76158	13.5335	2.09614
	2.67503	4.86056	2.6558
	6.47245	5.01312	0.985031
	0	26.2386	1.14291
	1.84518	6.64644	2.0072
	5.14897	5.16501	1.11734
	1.18737	7.28707	2.66543
	0	1.82857	1.91106
	2.01808	7.8447	0.99511
	1.82189	3.41588	0.896996
	1.08948	1.98272	2.53581
	4.76407	2.00717	0.877397
	0.867668	2.77519	2.92573
	0.873165		2.66431
	4.96119		2.97573
	1.30085		0.921362
	1.79413		0.87981
Average	2.66638	6.59847	1.65114		39.2426	53.9956	18.2451
TTEST		0.00100283	0.0109953			0.000131112	4.42373e-07
SEM	0.346125	1.04965	0.178831		2.52007	2.26619	2.14023
N	37	33	37		17	17	17

## Sheet: Figure 5E
	5.6 mM glucose						10 mM pyruvate
	Control	Bcl-xL siRNA-1	Bcl-xL siRNA-2	Bcl-xL siRNA-3	Bcl-xL OE		NC	Bcl-xL siRNA-1	Bcl-xL siRNA-2	Bcl-xL siRNA-3	Bcl-xL OE
	14.699	15.905	0.767	9.252	1.467		13.193	12.809	19.759	26.233	6.397
	6.17	6.311	2.069	7.638	0.724		18.698	17.846	20.484	16.529	7.545
	3.84	6.386	6.608	6.908	1.907		12.47	54.859	13.909	24.231	3.247
	6.873	19.665	0.54	4.188	0		20.699	16.058	23.791	14.327	8.79
	1.546	8.764	13.793	7.674	1.268		12.736	32.281	22.334	28.444	5.682
	11.628	7.96	3.879	4.575	4.403		18.439	18.378	15.518	35.422	10.321
	10.844	5.94	3.486	10.813	1.575		17.203	20.572	18.6	26.116	4.219
	14.504	14.824	21.52	5.61	3.162		21.514	26.803	34.662	17.654	13.972
	1.587	8.475	5.587	5.053	2.636		25.395	28.804	28.548	9.18	11.936
	7.743	19.412	8.283	7.418	3.861		21.113	25.568	34.063	17.564	2.717
	4.966	6.211	11.553	5.451	0.832		24.413	28.065	42.116	12.579	4.854
	7.784	19.595	28.18	5.478	2.885		15.362	20.417	31.597	26.72	5.013
	3.976	6.353	8.214	6.936	3.623		19.373	27.939	29.362	31.519	3.492
	4.395	1.603	6.745	2.625	0.742		21.791	28.723	41.481	18.053	2.193
	6.529	3.535	1.433	4.737	2.17			33.403	31.12	14.986	4.781
	3.673	6.837	6.657	5.689	2.246		15.829	18.086	42.705	18.999	6.445
	8.073	7.197	3.851	3.978	0.733		16.813	8.037	39.541	30.632	5.081
	6.647	4.112	5.151	8.765	1.916		20.314	29.412	41.096	37.722	3.448
	3.3	1.278	15.27	3.218	1.667		10.241	13.567	50.584	24.43	2.404
	6.772	11.944	2.976	4.032	2.49		10.582	21.664	56.338	21.171	2.144
	2.632	5.983	4.703	1.803	2.865		20.238	45.374	34.263	23.256	10.776
	7.435	5.995	11.194	3.71	2.119		14.683	41.536	41.332	20.012	2.53
	4.063	20.138	12.555	8.389	3.497		12.65	27.409	45.729	19.569
	6.867	8.672	7.261	6.464	1.635		13.616	45.208	41.516	33.216
	7.895	11.435	16.117	3.91	2.921		23.454	41.825	35.556	26.531
	9.828	10.828	5.842	8.019	1.032		23.715
	6.181	10.825	10.101	3.989			12.115	24.704	29.022	41.096
	6.461	10.011	17.45	8.282			10.29	28.362	26.906	41.367
	11.443	10.411	6.147					26.049	29.682	13.727
	2.905	13.172	2.538	25.408				19.249	16.869	30.239
			5.003	21.244				19.375	32.609	49.669
	9.517	18.49	2.808	24.465				28.269	21.781	19.622
	9.158	15.298	11.845	20.031				15.214	21.906	28.044
	4.137	12.403	11.385	53.75				34.253	19.324	33.084
	18.811	17.97	5.848	17.785				31.325	29.915	25.501
	11.092	13.482		23.499				20.69	20.392	18.088
	25.316	10.92	19.274	74.766				30.466	20.134	25.696
	9.709	3.977	26.21	15.319				27.23	10.4	17.825
	8.929	10.315	30.411	32.298				27.656	32.351	15.274
	14.295	4.995	36.817	22.823					29.026	26.379
	9.959	1.859	34.814	20.032						34.515
	9.407	12.748	19.964	32.665
	12.17	10.811	10.967	60.708
	12.003	13.09	13.172	19.512
	2.494	23.444	31.609	10.356
	7.519	9.967	21.722	24.135
	14.019	35.951	23.256	16.381
	13.083	39.305	15.067	17.227
	8.859	28.868	15.345	13.086
	14.354	40.481	15.031	15.647
	15.528	26.042	4.59	17.025
	12.559	18.41	26.123	7.692
	18.95	15.201	23.196	18.657
	15.162	13.712	23.31	20.785
	23.845	19.315	29.224
	12.878	13.732	17.07
			17.12
			22.788
			15.917
			24.066
			31.621
Average	9.36385	13.1011	13.9341	14.9038	2.09138		17.294	26.7759	30.1621	24.8805	5.81759
SEM	0.704278	1.17102	1.24737	1.98917	0.217509		0.896854	1.59165	1.69964	1.40265	0.725912
TTEST		0.00753555	0.00194101	0.0107847	1.92831e-14			3.002e-06	1.11682e-08	2.49945e-05	4.27269e-13
N	55	55	60	53	26		27	38	39	40	22

## Sheet: Figure 5F
	10 mP pyruvate
	ATP (fold change)
	Control		ABT		Bcl-xL OE
	1.08516		0.783497		0.960598
	0.982542		0.772053		1.21896
	1.24625		0.787416		0.656072
	0.800057		1.18488		0.720335
	1.15128		1.30795		0.992472
	1.18038		1.76548		0.508639
	1.10322		0.91062		1.44852
	0.791802		0.973889		0.9658
	0.792825		0.63591		0.589699
	0.872558		0.691991		1.26107
	0.632174		1.29638		1.02246
	0.960799		1.12634		0.941378
	1.06208		0.703219		1.14013
	0.740006		0.374372		1.08808
	1.25964		0.904435		1.50426
	1.11579		0.679987		1.2361
	0.771288		0.85715		0.983299
	0.975081		1.14022		0.945166
	1.0307		0.419461		0.9823
	0.946356		1.12572		0.950002
	1.31293		1.0225		0.843468
	0.686829		0.922044		0.766466
	1.14648		1.1804		1.30832
	0.918944		0.852745		1.43971
	0.725551		0.644403		0.811988
	0.956409		0.971933		1.0192
	0.970739		0.634694		0.746626
	1.07691		0.565421		0.893558
	1.82503		1.51982		1.3279
	1.06952		1.19297		0.679501
	0.732231		1.0559		0.689061
	0.873765		1.69747		0.7072
	0.625191		0.913685		0.704191
	1.0159		0.569743		1.35671
	1.38321		1.27625		0.819582
	1.0041		0.847779		0.911028
	0.948919		0.598453		1.03086
	1.0883		0.658208		0.926434
	0.832332		0.532152		1.08367
	0.626425		1.16774		0.940727
	1.20236		0.897407		1.62056
	0.849323		1.07283		1.21643
	0.913387		0.802885		1.56705
	0.737774		1.00984		0.883339
	0.907334		0.703319		1.35892
	0.985542		0.632468		1.55891
	0.693893		0.996759		1.21657
	0.699648		1.21287		1.3779
	0.719879		0.536831		1.29761
	0.871392		0.806042		1.32722
	0.602981		1.05938		1.43161
	0.566079		0.873447		0.949899
	1.21546		0.627687		1.36135
	1.57839		1.29983		0.958423
	1.01809		1.13196		0.795041
	0.801128		0.728874		1.08475
	1.10939		0.413732		1.54725
	1.57889		1.70085		1.30779
	0.824338		1.30622		1.41287
	0.451146		1.25219		1.4765
	0.951628		1.11583		1.0241
	0.712293		1.03217		1.09022
	1.28597		1.31451		1.23131
	1.51222		0.398131		1.04056
	1.06495		1.05994		1.11304
	0.896063		0.600188		1.13152
	0.762378		0.931825		1.40443
	0.924398		0.924117		0.970206
	0.851672		1.03867		1.04795
	0.712404		0.738574		1.25764
	0.988465		1.21673		1.15522
	1.10189		1.78485		0.814473
	0.786559		0.851728		0.82791
	0.8868		1.22488		0.512463
	1.93769		0.492806		0.902172
	0.779503		1.40687		1.04897
	0.868896		0.783812		1.36096
	1.00633		1.29856		1.4261
	1.14194		0.708934		1.44854
	1.01793		0.641836		0.818413
	1.67092		1.35503		1.01191
	0.559175		0.628947		1.5267
	1.63995		1.31598		1.35364
	0.701786		0.962816		1.14157
	1.04657		0.910446		1.23854
	0.748958		0.816183		1.49838
	0.711709		0.915868		1.21902
	1.17433		1.18998		1.19608
	0.803348		1.58194		1.14861
	1.07449		0.326659		0.681313
	1.19011		1.20808		0.639055
	1.10486		0.821499		1.14976
	1.27181		0.8907		1.05178
	0.699448		0.795776		0.828175
	0.90849		0.793518		0.777164
	1.42859		0.567652		1.51103
	1.16283		0.903935		0.6337
	0.953954		0.880468		1.05529
	0.72543		0.984379		1.06963
	0.953214		0.852903		1.27593
	0.706622		0.91409		0.985477
	0.896411		0.937061		1.52817
	0.859068		0.745987		1.20894
	0.51869		0.625876		1.58991
	1.09391		0.714477		1.3252
	0.82235		0.826867		0.776615
	1.35056		0.808135		1.8811
	0.801602		0.390735		1.3593
	0.669957		0.884323		1.61745
	1.14057		0.801541		1.13607
	0.829176		0.87881		1.07771
	1.22697		0.694818		0.901312
	1.19419		0.720461		1.11741
	1.01033		1.23096		1.33187
	0.607176		1.03863		1.17273
	1.0687		0.740978		0.926151
	0.698358		1.25201		1.15182
	0.536005		1.32775		1.23552
	1.01336		0.821098		1.09111
	1.68281		0.881203		1.83784
	0.9172		0.401541		1.1678
	0.881916		0.749085		0.705921
	0.737927		0.748275		1.33852
	1.39688		0.610985		1.03051
	1.01507		0.643529		1.02074
	0.627756		0.417767		1.27353
	0.523675		0.459568		1.31784
	1.04314		0.693512		1.51305
	0.695079		1.19979		0.884021
	0.946888		0.892249		1.59253
	1.10829		0.516026		1.37766
	1.00789		0.471077		1.21601
	1.07582		1.36837		1.24644
	1.09454		0.643674		1.1955
	1.25495		0.945252		0.96713
	1.71381		0.872702		1.33676
	1.15684		0.360558		1.46192
	0.942614		1.06202		1.15897
	1.22659		0.638111		1.13038
	1.30813		1.04717		1.14822
	1.12718		0.694918		1.11112
	1.00764		0.435806		0.840348
	1.06522		0.97595		0.833664
	1.2915		0.685781		0.758246
	1.37892		0.663834		0.957786
	0.966704		1.57003		1.12127
	1.47566		1.06477		1.27931
	1.41929		1.19641		0.774554
	1.37216		1.01505		1.12208
	1.49253		1.05637		1.30397
	1.23204		0.879582		1.39917
	0.688565		0.827739		1.10758
	1.06877		0.753955		0.906477
	1.05968		0.641604		1.08343
	0.558815		1.063		1.10745
	0.653617		0.712768		0.964868
	0.75755		0.893887
	0.888339		1.23016		1.35169
	1.20249		0.816324		2.93027
	0.691478		1.26589		2.00843
	1.91904		0.397834		1.31816
	0.614506		0.590005		2.88078
	1.30038		1.2548		2.9225
			0.607884		1.7506
	1.14515		1.18371		1.71814
	0.868917		1.07341		1.40974
	0.191233		1.4684		0.444218
	1.03817		1.21977		2.58915
	2.81044		1.32512		1.6945
	1.24936		0.737489		1.27601
	0.984501		1.24184		0.43509
	0.0688811		0.934415		0.463171
	0.82359		1.43953		0.916682
	0.268931		0.930095		2.70869
	1.11408				0.330891
	1.0727		0.380864		3.49111
	1.28911		0.986376		1.36126
	1.61322		0.203722		0.180289
	0.273339		0.582623		1.09379
	2.24789		0.398195		1.68882
	0.872864		1.65389		1.45067
	1.3148		0.569776		1.71223
	0.670579		1.10637		1.07915
	0.433614		0.877669		0.776123
	0.170536		1.19975		1.95158
	1.88425		2.4471		0.255179
	1.18025		0.904603		1.37484
	1.97604		0.127768		1.21779
	1.44363		0.254691		1.19654
	0.808816		0.229362		1.54738
	1.03018		0.833632		0.449189
	0.412793		0.336854		1.81416
	0.0758848		0.327814		1.65849
	0.0771084		0.700079		2.46951
	1.53984		1.28421		1.22436
	0.392567		0.25045		0.10969
	1.87971		0.846284		1.77567
	1.36641		0.882738		1.85828
	1.16273		0.122878		0.452356
	0.890645		1.26352		1.80012
	0.886039		0.0892157		0.876827
	1.03641		1.25855		1.49268
	0.0705302		0.799998		2.62123
	0.143252		0.371213		1.51365
	0.543618				0.610572
	0.264078				2.65967
	1.27565				0.859209
	1.03664				0.211315
	1.58657				0.251695
	0.958364				2.55426
	0.33512				0.904245
	0.771289				0.374672
	1.74637				3.76762
	0.217432				0.166643
	0.381799				1.96942
	0.576463				1.70795
	0.1195				0.814775
	0.64733				0.216323
	1.03057				1.54272
	1.25259				0.191011
	0.921522				1.49293
	0.0619811				2.02625
	1.52388				0.750469
	0.930803				1.79129
	1.24901				1.42506
	1.35567				0.938882
	1.15831				1.82071
	0.189924				1.76567
	1.09249				0.936359
	0.989966				0.948343
	0.954055				0.577475
	0.621389				3.58751
	1.55464				0.988646
	0.316789				0.472124
	0.805777				0.167061
	0.9513				0.629197
	0.962825				1.61174
	0.891971				0.398309
	0.368234				2.26887
	1.03079				1.14139
	0.758995				0.513668
	0.866725				0.123433
	0.862296				1.345
	0.967429				1.80592
	0.802009				0.63388
	0.76005				1.85874
	0.340011				0.619315
	0.839992				1.74042
	1.43122				0.0683264
	1.19884				1.11455
	1.34501				0.533337
	0.246481				1.38691
	0.335399				1.72015
	0.787043				1.62847
	1.24588				0.546812
	0.921128				0.80371
	0.84624				1.23249
	0.992819				2.06827
	0.857308				0.768586
	1.26168				0.146672
	0.801159				0.636079
	1.12402				0.671373
	1.21507				0.888838
	1.20612				1.63358
	1.0066				1.67085
	0.859442				1.10387
	1.19042				1.08398
	1.25164				1.45086
	1.0792				1.67989
	1.08682				1.08012
	1.03733				0.948902
	0.927297				0.662125
	0.381229				1.2133
	0.731076				1.89362
	1.12867				0.470093
	0.715626				0.287692
	1.25441				0.56387
	0.932219				1.41272
	2.02461				2.39697
	1.40066				1.74343
	0.811524				1.47759
	0.601297				1.69819
	0.765038				0.151595
	1.2466				0.393918
	1.24904				0.844373
	1.11973				1.73884
	0.323629				0.637402
	0.627069				1.63455
	0.573342				0.0604838
	1.05625				1.30102
	2.12919				1.51178
	0.721654				1.54372
	2.09239				0.270798
	0.464139				0.947942
	1.56284				1.52054
	2.15314				1.14525
	0.145832				1.24103
	0.988934				1.22065
	1.88313				1.76819
	2.11465				1.75729
	1.98222				1.7265
	0.717268				1.49731
	1.31641				0.83003
	0.309851				0.827069
	0.282596				0.649395
	1.26228				2.33985
	0.960484				1.87696
	1.99568				0.294345
	0.755202				0.703383
	1.05741				3.87242
	1.31362				1.48507
	0.893296				0.333732
	2.1516				1.42561
	1.5355				0.786966
	1.08935				0.248081
	1.34493				1.31274
	0.41147				0.26489
	1.17712				1.45538
	1.20987				0.909484
	1.46939				0.466595
	1.33336				1.19269
	1.13826				1.22712
	1.10554				1.38226
	1.35888				1.41486
	0.41831				1.055
	0.943503				1.79061
	1.21177				1.39229
	1.54939				1.28004
	1.47312				0.277902
	0.936997				1.81358
	1.60353				0.454446
	0.861383				1.64405
	0.394096				0.350829
	1.61444				1.35299
	1.52841
	0.903113
	1.67623
	1.25734
	0.862702
	0.0963322
	1.77842
	0.320639
	0.0494469
	2.67159
	0.595249
	0.543458
	1.32752
	0.92633
	0.810853
	0.524194
	1.11361
	1.9974
	1.24727
	0.269917
	0.495488
	1.38484
	1.48562
	0.572539
	1.25346
	0.215039
	1.02114
	0.210478
	1.24889
	1.33109
Average	1		0.890216		1.18812
SEM	0.0230414		0.0246491		0.0321083
TTEST			0.00121664		2.41668e-06
N	363		203		333

## Sheet: Figure 5G
	10 mM pyruvate
	ATP (fold change)								Mitoflash (fold change)
	Control		ABT		Bcl-xL OE				Control	ABT	Bcl-xL OE
	1.08516		0.783497		0.960598				0.583295	1.26779	0.442923
	0.982542		0.772053		1.21896				0.601435	1.5936	0.215556
	1.24625		0.787416		0.656072				1.12806	1.69141	0.351413
	0.800057		1.18488		0.720335				1.24555	1.31952	0.45079
	1.15128		1.30795		0.992472				1.40277	1.65286	0.400467
	1.18038		1.76548		0.508639				1.14157	1.2518	0.484282
	1.10322		0.91062		1.44852				0.669316	1.76966	0.569743
	0.791802		0.973889		0.9658				1.43591	1.06747	0.361564
	0.792825		0.63591		0.589699				1.13086	1.39507	1.14658
	0.872558		0.691991		1.26107				0.744583	1.29466	0.474663
	0.632174		1.29638		1.02246				0.743961	1.32466	0.601309
	0.960799		1.12634		0.941378				0.855114	1.80103	0.362165
	1.06208		0.703219		1.14013				1.13723	1.30701	0.111639
	0.740006		0.374372		1.08808				1.08114	1.06142	0.305036
	1.25964		0.904435		1.50426				1.07563	1.28934	0.6955
	1.11579		0.679987		1.2361				1.13541	1.1759	0.534534
	0.771288		0.85715		0.983299				0.888172	1.12785	0.395675
	0.975081		1.14022		0.945166
	1.0307		0.419461		0.9823
	0.946356		1.12572		0.950002			Average	1	1.37594	0.464932
	1.31293		1.0225		0.843468			SEM	0.0642178	0.0577483	0.0545383
	0.686829		0.922044		0.766466			TTEST		0.000131112	4.42373e-07
	1.14648		1.1804		1.30832			N	17	17	17
	0.918944		0.852745		1.43971
	0.725551		0.644403		0.811988
	0.956409		0.971933		1.0192
	0.970739		0.634694		0.746626
	1.07691		0.565421		0.893558
	1.82503		1.51982		1.3279
	1.06952		1.19297		0.679501
	0.732231		1.0559		0.689061
	0.873765		1.69747		0.7072
	0.625191		0.913685		0.704191
	1.0159		0.569743		1.35671
	1.38321		1.27625		0.819582
	1.0041		0.847779		0.911028
	0.948919		0.598453		1.03086
	1.0883		0.658208		0.926434
	0.832332		0.532152		1.08367
	0.626425		1.16774		0.940727
	1.20236		0.897407		1.62056
	0.849323		1.07283		1.21643
	0.913387		0.802885		1.56705
	0.737774		1.00984		0.883339
	0.907334		0.703319		1.35892
	0.985542		0.632468		1.55891
	0.693893		0.996759		1.21657
	0.699648		1.21287		1.3779
	0.719879		0.536831		1.29761
	0.871392		0.806042		1.32722
	0.602981		1.05938		1.43161
	0.566079		0.873447		0.949899
	1.21546		0.627687		1.36135
	1.57839		1.29983		0.958423
	1.01809		1.13196		0.795041
	0.801128		0.728874		1.08475
	1.10939		0.413732		1.54725
	1.57889		1.70085		1.30779
	0.824338		1.30622		1.41287
	0.451146		1.25219		1.4765
	0.951628		1.11583		1.0241
	0.712293		1.03217		1.09022
	1.28597		1.31451		1.23131
	1.51222		0.398131		1.04056
	1.06495		1.05994		1.11304
	0.896063		0.600188		1.13152
	0.762378		0.931825		1.40443
	0.924398		0.924117		0.970206
	0.851672		1.03867		1.04795
	0.712404		0.738574		1.25764
	0.988465		1.21673		1.15522
	1.10189		1.78485		0.814473
	0.786559		0.851728		0.82791
	0.8868		1.22488		0.512463
	1.93769		0.492806		0.902172
	0.779503		1.40687		1.04897
	0.868896		0.783812		1.36096
	1.00633		1.29856		1.4261
	1.14194		0.708934		1.44854
	1.01793		0.641836		0.818413
	1.67092		1.35503		1.01191
	0.559175		0.628947		1.5267
	1.63995		1.31598		1.35364
	0.701786		0.962816		1.14157
	1.04657		0.910446		1.23854
	0.748958		0.816183		1.49838
	0.711709		0.915868		1.21902
	1.17433		1.18998		1.19608
	0.803348		1.58194		1.14861
	1.07449		0.326659		0.681313
	1.19011		1.20808		0.639055
	1.10486		0.821499		1.14976
	1.27181		0.8907		1.05178
	0.699448		0.795776		0.828175
	0.90849		0.793518		0.777164
	1.42859		0.567652		1.51103
	1.16283		0.903935		0.6337
	0.953954		0.880468		1.05529
	0.72543		0.984379		1.06963
	0.953214		0.852903		1.27593
	0.706622		0.91409		0.985477
	0.896411		0.937061		1.52817
	0.859068		0.745987		1.20894
	0.51869		0.625876		1.58991
	1.09391		0.714477		1.3252
	0.82235		0.826867		0.776615
	1.35056		0.808135		1.8811
	0.801602		0.390735		1.3593
	0.669957		0.884323		1.61745
	1.14057		0.801541		1.13607
	0.829176		0.87881		1.07771
	1.22697		0.694818		0.901312
	1.19419		0.720461		1.11741
	1.01033		1.23096		1.33187
	0.607176		1.03863		1.17273
	1.0687		0.740978		0.926151
	0.698358		1.25201		1.15182
	0.536005		1.32775		1.23552
	1.01336		0.821098		1.09111
	1.68281		0.881203		1.83784
	0.9172		0.401541		1.1678
	0.881916		0.749085		0.705921
	0.737927		0.748275		1.33852
	1.39688		0.610985		1.03051
	1.01507		0.643529		1.02074
	0.627756		0.417767		1.27353
	0.523675		0.459568		1.31784
	1.04314		0.693512		1.51305
	0.695079		1.19979		0.884021
	0.946888		0.892249		1.59253
	1.10829		0.516026		1.37766
	1.00789		0.471077		1.21601
	1.07582		1.36837		1.24644
	1.09454		0.643674		1.1955
	1.25495		0.945252		0.96713
	1.71381		0.872702		1.33676
	1.15684		0.360558		1.46192
	0.942614		1.06202		1.15897
	1.22659		0.638111		1.13038
	1.30813		1.04717		1.14822
	1.12718		0.694918		1.11112
	1.00764		0.435806		0.840348
	1.06522		0.97595		0.833664
	1.2915		0.685781		0.758246
	1.37892		0.663834		0.957786
	0.966704		1.57003		1.12127
	1.47566		1.06477		1.27931
	1.41929		1.19641		0.774554
	1.37216		1.01505		1.12208
	1.49253		1.05637		1.30397
	1.23204		0.879582		1.39917
	0.688565		0.827739		1.10758
	1.06877		0.753955		0.906477
	1.05968		0.641604		1.08343
	0.558815		1.063		1.10745
	0.653617		0.712768		0.964868
	0.75755		0.893887
	0.888339		1.23016		1.35169
	1.20249		0.816324		2.93027
	0.691478		1.26589		2.00843
	1.91904		0.397834		1.31816
	0.614506		0.590005		2.88078
	1.30038		1.2548		2.9225
			0.607884		1.7506
	1.14515		1.18371		1.71814
	0.868917		1.07341		1.40974
	0.191233		1.4684		0.444218
	1.03817		1.21977		2.58915
	2.81044		1.32512		1.6945
	1.24936		0.737489		1.27601
	0.984501		1.24184		0.43509
	0.0688811		0.934415		0.463171
	0.82359		1.43953		0.916682
	0.268931		0.930095		2.70869
	1.11408				0.330891
	1.0727		0.380864		3.49111
	1.28911		0.986376		1.36126
	1.61322		0.203722		0.180289
	0.273339		0.582623		1.09379
	2.24789		0.398195		1.68882
	0.872864		1.65389		1.45067
	1.3148		0.569776		1.71223
	0.670579		1.10637		1.07915
	0.433614		0.877669		0.776123
	0.170536		1.19975		1.95158
	1.88425		2.4471		0.255179
	1.18025		0.904603		1.37484
	1.97604		0.127768		1.21779
	1.44363		0.254691		1.19654
	0.808816		0.229362		1.54738
	1.03018		0.833632		0.449189
	0.412793		0.336854		1.81416
	0.0758848		0.327814		1.65849
	0.0771084		0.700079		2.46951
	1.53984		1.28421		1.22436
	0.392567		0.25045		0.10969
	1.87971		0.846284		1.77567
	1.36641		0.882738		1.85828
	1.16273		0.122878		0.452356
	0.890645		1.26352		1.80012
	0.886039		0.0892157		0.876827
	1.03641		1.25855		1.49268
	0.0705302		0.799998		2.62123
	0.143252		0.371213		1.51365
	0.543618				0.610572
	0.264078				2.65967
	1.27565				0.859209
	1.03664				0.211315
	1.58657				0.251695
	0.958364				2.55426
	0.33512				0.904245
	0.771289				0.374672
	1.74637				3.76762
	0.217432				0.166643
	0.381799				1.96942
	0.576463				1.70795
	0.1195				0.814775
	0.64733				0.216323
	1.03057				1.54272
	1.25259				0.191011
	0.921522				1.49293
	0.0619811				2.02625
	1.52388				0.750469
	0.930803				1.79129
	1.24901				1.42506
	1.35567				0.938882
	1.15831				1.82071
	0.189924				1.76567
	1.09249				0.936359
	0.989966				0.948343
	0.954055				0.577475
	0.621389				3.58751
	1.55464				0.988646
	0.316789				0.472124
	0.805777				0.167061
	0.9513				0.629197
	0.962825				1.61174
	0.891971				0.398309
	0.368234				2.26887
	1.03079				1.14139
	0.758995				0.513668
	0.866725				0.123433
	0.862296				1.345
	0.967429				1.80592
	0.802009				0.63388
	0.76005				1.85874
	0.340011				0.619315
	0.839992				1.74042
	1.43122				0.0683264
	1.19884				1.11455
	1.34501				0.533337
	0.246481				1.38691
	0.335399				1.72015
	0.787043				1.62847
	1.24588				0.546812
	0.921128				0.80371
	0.84624				1.23249
	0.992819				2.06827
	0.857308				0.768586
	1.26168				0.146672
	0.801159				0.636079
	1.12402				0.671373
	1.21507				0.888838
	1.20612				1.63358
	1.0066				1.67085
	0.859442				1.10387
	1.19042				1.08398
	1.25164				1.45086
	1.0792				1.67989
	1.08682				1.08012
	1.03733				0.948902
	0.927297				0.662125
	0.381229				1.2133
	0.731076				1.89362
	1.12867				0.470093
	0.715626				0.287692
	1.25441				0.56387
	0.932219				1.41272
	2.02461				2.39697
	1.40066				1.74343
	0.811524				1.47759
	0.601297				1.69819
	0.765038				0.151595
	1.2466				0.393918
	1.24904				0.844373
	1.11973				1.73884
	0.323629				0.637402
	0.627069				1.63455
	0.573342				0.0604838
	1.05625				1.30102
	2.12919				1.51178
	0.721654				1.54372
	2.09239				0.270798
	0.464139				0.947942
	1.56284				1.52054
	2.15314				1.14525
	0.145832				1.24103
	0.988934				1.22065
	1.88313				1.76819
	2.11465				1.75729
	1.98222				1.7265
	0.717268				1.49731
	1.31641				0.83003
	0.309851				0.827069
	0.282596				0.649395
	1.26228				2.33985
	0.960484				1.87696
	1.99568				0.294345
	0.755202				0.703383
	1.05741				3.87242
	1.31362				1.48507
	0.893296				0.333732
	2.1516				1.42561
	1.5355				0.786966
	1.08935				0.248081
	1.34493				1.31274
	0.41147				0.26489
	1.17712				1.45538
	1.20987				0.909484
	1.46939				0.466595
	1.33336				1.19269
	1.13826				1.22712
	1.10554				1.38226
	1.35888				1.41486
	0.41831				1.055
	0.943503				1.79061
	1.21177				1.39229
	1.54939				1.28004
	1.47312				0.277902
	0.936997				1.81358
	1.60353				0.454446
	0.861383				1.64405
	0.394096				0.350829
	1.61444				1.35299
	1.52841
	0.903113
	1.67623
	1.25734
	0.862702
	0.0963322
	1.77842
	0.320639
	0.0494469
	2.67159
	0.595249
	0.543458
	1.32752
	0.92633
	0.810853
	0.524194
	1.11361
	1.9974
	1.24727
	0.269917
	0.495488
	1.38484
	1.48562
	0.572539
	1.25346
	0.215039
	1.02114
	0.210478
	1.24889
	1.33109
Average	1		0.890216		1.18812
SEM	0.0230414		0.0246491		0.0321083
TTEST			0.00121664		2.41668e-06
N	363		203		333

## Sheet: Figure 5-figure supplement 1A
										Normalized
Time [s]	Intensity Region 1	Intensity Region 2	Intensity Region 3	Intensity Region 4	Intensity Region 5	Intensity Region 6	Intensity Region 7	Intensity Region 8	mean	Intensity Region 1	Intensity Region 2		Intensity Region 4	Intensity Region 5	Intensity Region 6	Intensity Region 7	Intensity Region 8	mean
0	22.3	20.6	24.9	17.7	21.7	13.9	14.3	13.7	18.6375	1	1		1	1	1	1		1
10	22.4	20.6	24.9	17.6	21.5	14	14	14	18.625	1.00448	1		0.99435	0.990783	1.00719	0.979021		0.995972
20	22.3	20.6	24.4	17.2	21.5	13.9	14	14	18.4875	1	1		0.971751	0.990783	1	0.979021		0.990259
30	22.5	20.7	24.8	17.5	21.8	14	14.2	13.8	18.6625	1.00897	1.00485		0.988701	1.00461	1.00719	0.993007		1.00122
40	22.2	20.7	25.1	17.2	21.7	13.9	14.3	18.1	19.15	0.995516	1.00485		0.971751	1	1	1		0.995354
50.01	22.3	20.5	24.4	17.4	21.7	13.9	14.2	13.6	18.5	1	0.995146		0.983051	1	1	0.993007		0.995201
60.01	22.4	20.9	25.5	17.4	21.7	14	14.2	14.1	18.775	1.00448	1.01456		0.983051	1	1.00719	0.993007		1.00038
70.01	22.4	20.8	25.2	17.7	21.8	14.1	14.1	14.1	18.775	1.00448	1.00971		1	1.00461	1.01439	0.986014		1.0032
80.01	22.3	20.6	25.4	17.9	21.8	14.1	14.2	14.2	18.8125	1	1		1.0113	1.00461	1.01439	0.993007		1.00388
90.01	22.4	20.7	25.6	17.4	21.9	14.1	14.2	14.7	18.875	1.00448	1.00485		0.983051	1.00922	1.01439	0.993007		1.0015
100.01	22.2	20.6	28.4	17.9	21.7	14.4	14.4	14.2	19.225	0.995516	1		1.0113	1	1.03597	1.00699		1.0083
110.01	22.6	21	25.1	17.7	22.1	14.2	14.4	14.4	18.9375	1.01345	1.01942		1	1.01843	1.02158	1.00699		1.01331
120.01	22.5	20.8	25.5	17.5	21.6	14.4	14.5	14.1	18.8625	1.00897	1.00971		0.988701	0.995392	1.03597	1.01399		1.00879
130.01	22.5	21.1	25.6	17.8	22.1	14.4	14.4	14.5	19.05	1.00897	1.02427		1.00565	1.01843	1.03597	1.00699		1.01671
140.01	22.4	21.1	26.2	18	22.1	14.3	14.5	14.3	19.1125	1.00448	1.02427		1.01695	1.01843	1.02878	1.01399		1.01782
150.01	22.5	20.9	25.8	17.6	22.2	14.4	14.4	14.1	18.9875	1.00897	1.01456		0.99435	1.02304	1.03597	1.00699		1.01398
160.01	22.7	20.9	26.7	17.9	22.1	14.3	14.7	14.4	19.2125	1.01794	1.01456		1.0113	1.01843	1.02878	1.02797		1.01983
170.01	22.5	21	25.8	18	22.1	14.3	14.4	14.1	19.025	1.00897	1.01942		1.01695	1.01843	1.02878	1.00699		1.01659
180.02	22.4	20.9	26.1	17.8	21.8	14.2	14.4	17.2	19.35	1.00448	1.01456		1.00565	1.00461	1.02158	1.00699		1.00965
190.02	22.8	20.8	26.7	17.8	21.7	14.3	14.6	14.2	19.1125	1.02242	1.00971		1.00565	1	1.02878	1.02098		1.01459
200.01	22.5	20.9	26.5	17.5	21.9	14.3	14.5	14.7	19.1	1.00897	1.01456		0.988701	1.00922	1.02878	1.01399		1.0107
210.02	22.6	21.3	26.4	18.1	21.8	14.7	14.7	14.6	19.275	1.01345	1.03398		1.0226	1.00461	1.05755	1.02797		1.02669
220.02	22.7	20.7	49.6	17.6	21.8	14.3	14.4	15	22.0125	1.01794	1.00485		0.99435	1.00461	1.02878	1.00699		1.00959
230.02	22.6	20.8	24.5	17.6	21.6	14.3	14.3	14.6	18.7875	1.01345	1.00971		0.99435	0.995392	1.02878	1		1.00695
240.02	22.5	20.9	24.7	17.4	22	14.2	14.5	14.3	18.8125	1.00897	1.01456		0.983051	1.01382	1.02158	1.01399		1.00933
250.02	22.5	20.7	24.5	17.6	21.7	14	14.3	13.8	18.6375	1.00897	1.00485		0.99435	1	1.00719	1		1.00256
260.02	22.3	20.6	25.2	17.4	21.8	14.1	14.4	13.7	18.6875	1	1		0.983051	1.00461	1.01439	1.00699		1.00151
270.02	22.3	20.6	24.9	17.6	21.4	14.2	14.2	13.8	18.625	1	1		0.99435	0.986175	1.02158	0.993007		0.999186
280.02	22.3	20.5	24.9	17.6	21.5	14.1	14.3	13.8	18.625	1	0.995146		0.99435	0.990783	1.01439	1		0.999111
290.02	22.2	20.2	25.4	17.2	21.4	14.2	14.1	14.7	18.675	0.995516	0.980583		0.971751	0.986175	1.02158	0.986014		0.99027
300.02	22.4	20.6	25.7	17.3	21.6	14.1	14.3	13.8	18.725	1.00448	1		0.977401	0.995392	1.01439	1		0.998611
310.02	22.2	20.5	25.4	17.2	21.7	14	14.3	14.3	18.7	0.995516	0.995146		0.971751	1	1.00719	1		0.994934
320.02	22.2	20.5	25	17.3	21.5	14.1	14.1	13.7	18.55	0.995516	0.995146		0.977401	0.990783	1.01439	0.986014		0.993208
330.02	22.2	20.3	25.5	17	21.5	13.9	14.1	14.5	18.625	0.995516	0.985437		0.960452	0.990783	1	0.986014		0.986367
340.03	22.1	20.3	25.3	17.3	21.1	14	14.1	13.6	18.475	0.991031	0.985437		0.977401	0.97235	1.00719	0.986014		0.986571
350.03	22.2	20.5	24.9	17.4	21.1	13.9	14.2	13.2	18.425	0.995516	0.995146		0.983051	0.97235	1	0.993007		0.989845
360.03	22.1	20.6	25.1	17.3	21.2	13.8	14.2	13.2	18.4375	0.991031	1		0.977401	0.976959	0.992806	0.993007		0.988534
370.03	22	20.3	25.7	17.2	21.4	14	14.2	13.3	18.5125	0.986547	0.985437		0.971751	0.986175	1.00719	0.993007		0.988352
380.03	22	20.5	25.4	17.3	20.9	14	14.2	13	18.4125	0.986547	0.995146		0.977401	0.963134	1.00719	0.993007		0.987071
390.03	22	20.6	25.1	17.2	21.7	13.8	14.1	13.5	18.5	0.986547	1		0.971751	1	0.992806	0.986014		0.98952
400.04	22.3	20.2	25.9	17	21.4	14	14.2	13.5	18.5625	1	0.980583		0.960452	0.986175	1.00719	0.993007		0.987902
410.04	21.9	20.3	25.3	17	21.6	13.9	14.2	13.5	18.4625	0.982063	0.985437		0.960452	0.995392	1	0.993007		0.986058
420.04	22.3	20.6	25	17	21.4	13.9	14	13.7	18.4875	1	1		0.960452	0.986175	1	0.979021		0.987608
430.04	22.1	20	25.8	17.1	21.2	13.7	14.3	13.5	18.4625	0.991031	0.970874		0.966102	0.976959	0.985612	1		0.981763
440.04	21.9	20.1	25.4	16.9	21.2	13.8	13.9	13.3	18.3125	0.982063	0.975728		0.954802	0.976959	0.992806	0.972028		0.975731
450.04	21.8	20.1	24.1	17.4	21	13.8	13.8	13.7	18.2125	0.977578	0.975728		0.983051	0.967742	0.992806	0.965035		0.97699
460.04	22	19.9	23.7	16.9	21.1	13.7	14	13.4	18.0875	0.986547	0.966019		0.954802	0.97235	0.985612	0.979021		0.974059
470.04	22.3	20.2	23.9	16.9	21.1	13.8	14	13.7	18.2375	1	0.980583		0.954802	0.97235	0.992806	0.979021		0.979927
480.04	22.1	20.2	24.1	16.9	21.4	13.9	14	13.4	18.25	0.991031	0.980583		0.954802	0.986175	1	0.979021		0.981935
490.04	21.9	19.9	24.3	17.1	20.8	13.6	13.7	13.5	18.1	0.982063	0.966019		0.966102	0.958525	0.978417	0.958042		0.968195
500.04	22	20.5	24.4	17.3	21.4	13.7	14	13.6	18.3625	0.986547	0.995146		0.977401	0.986175	0.985612	0.979021		0.984984
510.04	22.1	20.1	24.9	16.8	21.2	13.7	13.9	14.3	18.375	0.991031	0.975728		0.949153	0.976959	0.985612	0.972028		0.975085
520.05	21.9	19.7	24.6	16.7	21.1	13.6	13.8	13.7	18.1375	0.982063	0.956311		0.943503	0.97235	0.978417	0.965035		0.96628
530.05	21.7	19.8	24.5	17.1	21.3	13.5	13.7	17.2	18.6	0.973094	0.961165		0.966102	0.981567	0.971223	0.958042		0.968532
540.05	21.8	19.9	25.3	16.6	21.1	13.8	13.8	13.4	18.2125	0.977578	0.966019		0.937853	0.97235	0.992806	0.965035		0.968607
550.05	21.8	19.8	25.2	17.2	20.8	13.8	13.8	13.7	18.2625	0.977578	0.961165		0.971751	0.958525	0.992806	0.965035		0.971144
560.05	22	19.8	24.5	16.8	21	13.8	13.8	13.8	18.1875	0.986547	0.961165		0.949153	0.967742	0.992806	0.965035		0.970408
570.05	21.8	19.8	26	16.6	21	13.5	14	13.4	18.2625	0.977578	0.961165		0.937853	0.967742	0.971223	0.979021		0.965764
580.05	21.9	19.8	24.2	17.1	21.1	13.9	13.8	13.5	18.1625	0.982063	0.961165		0.966102	0.97235	1	0.965035		0.974452
590.05	21.6	19.7	24.7	16.9	20.7	13.6	13.7	15.2	18.2625	0.96861	0.956311		0.954802	0.953917	0.978417	0.958042		0.961683
600.05	22.2	19.6	24.5	16.8	21.2	13.7	14	13.9	18.2375	0.995516	0.951456		0.949153	0.976959	0.985612	0.979021		0.972953
610.05	21.9	19.5	24.5	17	21.3	13.8	13.9	14	18.2375	0.982063	0.946602		0.960452	0.981567	0.992806	0.972028		0.972586
620.05	21.7	19.7	24.7	16.7	21	13.7	13.9	13.6	18.125	0.973094	0.956311		0.943503	0.967742	0.985612	0.972028		0.966382
630.05	22	20	29.6	16.7	21	13.8	13.9	13.3	18.7875	0.986547	0.970874		0.943503	0.967742	0.992806	0.972028		0.97225
640.05	21.8	19.8	23.7	16.5	20.9	13.7	13.8	12.8	17.875	0.977578	0.961165		0.932203	0.963134	0.985612	0.965035		0.964121
650.05	22	19.8	23.7	16.5	21.1	13.7	13.8	12.8	17.925	0.986547	0.961165		0.932203	0.97235	0.985612	0.965035		0.967152
660.05	21.9	19.8	23.8	16.7	21	13.5	13.8	13.1	17.95	0.982063	0.961165		0.943503	0.967742	0.971223	0.965035		0.965122
670.06	21.8	19.4	24	16.9	21	13.7	13.8	12.8	17.925	0.977578	0.941748		0.954802	0.967742	0.985612	0.965035		0.965419
680.06	21.9	19.8	24	17.1	20.8	13.8	13.8	13.2	18.05	0.982063	0.961165		0.966102	0.958525	0.992806	0.965035		0.970949
690.06	22.2	19.9	24.3	17	21.2	14	14.2	13.6	18.3	0.995516	0.966019		0.960452	0.976959	1.00719	0.993007		0.983191
700.06	22.1	20	24.6	17.1	21	13.8	14.1	13.3	18.25	0.991031	0.970874		0.966102	0.967742	0.992806	0.986014		0.979095
710.06	21.9	19.9	25	17	21.2	13.8	13.9	14.1	18.35	0.982063	0.966019		0.960452	0.976959	0.992806	0.972028		0.975054
720.06	22	19.9	25.4	17.3	21	13.8	14.1	13.2	18.3375	0.986547	0.966019		0.977401	0.967742	0.992806	0.986014		0.979422
730.06	22.3	19.9	25.1	17.2	21.2	14	14.2	13.5	18.425	1	0.966019		0.971751	0.976959	1.00719	0.993007		0.985822
740.06	22.2	20.1	24.6	17.1	21.2	13.9	14.1	13.5	18.3375	0.995516	0.975728		0.966102	0.976959	1	0.986014		0.983386
750.06	22.2	20.1	25.3	16.8	21.1	13.9	14.1	13.6	18.3875	0.995516	0.975728		0.949153	0.97235	1	0.986014		0.979793
760.06	22.1	20.1	25.5	17	21.2	14	14.1	14	18.5	0.991031	0.975728		0.960452	0.976959	1.00719	0.986014		0.982896
770.06	22.1	20.1	25.5	17.3	21.7	13.9	14	13.3	18.4875	0.991031	0.975728		0.977401	1	1	0.979021		0.987197
780.06	22.2	20.1	25.2	17	21.4	14	14.1	13.7	18.4625	0.995516	0.975728		0.960452	0.986175	1.00719	0.986014		0.98518
790.06	22.3	20.3	25	17.4	21.8	14.2	14.3	13.9	18.65	1	0.985437		0.983051	1.00461	1.02158	1		0.999113
800.06	22.2	20.3	25.5	17.2	21.4	14.1	14.3	13.5	18.5625	0.995516	0.985437		0.971751	0.986175	1.01439	1		0.992211
810.07	22.2	20	25	17	21.1	14	14.4	13.9	18.45	0.995516	0.970874		0.960452	0.97235	1.00719	1.00699		0.985563
820.07	22.3	20.3	25.4	16.9	21.5	14.1	14.1	13.8	18.55	1	0.985437		0.954802	0.990783	1.01439	0.986014		0.988571
830.07	22.3	20.1	25.4	17	21.3	14.1	14.2	13.5	18.4875	1	0.975728		0.960452	0.981567	1.01439	0.993007		0.987524
840.07	22.3	20	24.5	16.8	21.3	14.1	14.3	13.6	18.3625	1	0.970874		0.949153	0.981567	1.01439	1		0.985997
850.07	22.3	20.2	23.9	16.5	21.4	14	14.1	14.2	18.325	1	0.980583		0.932203	0.986175	1.00719	0.986014		0.982028
860.07	22.1	19.8	24.5	16.4	20.9	14	14.2	15.1	18.375	0.991031	0.961165		0.926554	0.963134	1.00719	0.993007		0.973681
870.07	22.3	20.1	24.3	16.7	21.7	14	14	13.3	18.3	1	0.975728		0.943503	1	1.00719	0.979021		0.984241
880.07	22.2	20.4	23.9	16.6	21.4	14	14.3	13.1	18.2375	0.995516	0.990291		0.937853	0.986175	1.00719	1		0.986172
890.07	22.2	20.2	24.7	16.7	21.3	14	14.1	13	18.275	0.995516	0.980583		0.943503	0.981567	1.00719	0.986014		0.982396
900.07	22.3	20.3	24.1	16.7	21	14	14.2	13.5	18.2625	1	0.985437		0.943503	0.967742	1.00719	0.993007		0.982814
910.07	22	20.1	24.8	16.7	21.4	13.9	14.1	13.5	18.3125	0.986547	0.975728		0.943503	0.986175	1	0.986014		0.979661
920.08	22.3	20	24.8	16.6	21.2	14	14.1	13.3	18.2875	1	0.970874		0.937853	0.976959	1.00719	0.986014		0.979816
930.08	22.4	20.2	24.6	16.5	21.6	14.2	14.2	13.5	18.4	1.00448	0.980583		0.932203	0.995392	1.02158	0.993007		0.987875
940.08	22.1	20	24.8	16.8	21.1	14	14.3	13.5	18.325	0.991031	0.970874		0.949153	0.97235	1.00719	1		0.981767
950.08	22.1	20.2	25	16.6	21.3	14.1	14.1	13.5	18.3625	0.991031	0.980583		0.937853	0.981567	1.01439	0.986014		0.981906
960.08	22.4	20.2	25.3	16.8	21.2	14	14.3	14	18.525	1.00448	0.980583		0.949153	0.976959	1.00719	1		0.986395
970.08	22.2	20.1	25.4	16.6	21.4	14	14.3	13.5	18.4375	0.995516	0.975728		0.937853	0.986175	1.00719	1		0.983744
980.08	22.4	20.1	25.1	16.5	21.7	14	14.3	13.6	18.4625	1.00448	0.975728		0.932203	1	1.00719	1		0.986602
990.08	22.3	20.2	24.9	16.5	21.3	14.2	14.2	13.7	18.4125	1	0.980583		0.932203	0.981567	1.02158	0.993007		0.984824
1000.08	22	20.1	25.3	16.6	21.3	14.1	14.3	17.6	18.9125	0.986547	0.975728		0.937853	0.981567	1.01439	1		0.982681
1010.08	22.3	20.4	25.5	16.5	21.3	14.2	14.3	13.7	18.525	1	0.990291		0.932203	0.981567	1.02158	1		0.987607
1020.08	22.4	20.2	23.6	16.7	21.2	14.1	14.2	13.6	18.25	1.00448	0.980583		0.943503	0.976959	1.01439	0.993007		0.985487
1030.08	22.4	20.1	24.3	16.6	21.1	14.2	14.3	13.9	18.3625	1.00448	0.975728		0.937853	0.97235	1.02158	1		0.985333
1040.08	22.4	20.2	23.9	16.9	21.2	14.2	14.2	13.7	18.3375	1.00448	0.980583		0.954802	0.976959	1.02158	0.993007		0.98857
1050.09	22.4	20.4	24.1	16.6	21.4	14.2	14.2	13.4	18.3375	1.00448	0.990291		0.937853	0.986175	1.02158	0.993007		0.988899
1060.09	22.3	20.3	23.8	16.6	21.5	14.3	14.3	13.8	18.3625	1	0.985437		0.937853	0.990783	1.02878	1		0.990475
1070.08	22.3	20.3	24.3	16.8	21.3	14.2	14.3	14.1	18.45	1	0.985437		0.949153	0.981567	1.02158	1		0.989623
1080.09	22.4	20.5	24.5	16.8	21.3	14.2	14.3	14.6	18.575	1.00448	0.995146		0.949153	0.981567	1.02158	1		0.991989
1090.09	22.7	20.3	24.3	16.6	21.5	14.2	14.2	14.2	18.5	1.01794	0.985437		0.937853	0.990783	1.02158	0.993007		0.9911
1100.09	22.2	20.4	24.7	16.7	21.4	14.2	14.4	13.9	18.4875	0.995516	0.990291		0.943503	0.986175	1.02158	1.00699		0.990677
1110.09	22.4	20.4	29.3	16.9	21.7	14.1	14.4	13.8	19.125	1.00448	0.990291		0.954802	1	1.01439	1.00699		0.99516
1120.09	22.6	20.2	24.8	16.7	21.4	14.2	14.4	13.9	18.525	1.01345	0.980583		0.943503	0.986175	1.02158	1.00699		0.992048
1130.09	22.1	20.3	24.8	16.7	21.3	14.2	14.3	13.7	18.425	0.991031	0.985437		0.943503	0.981567	1.02158	1		0.987187
1140.09	22.2	20.2	24.7	16.4	21.3	14.3	14.4	14.7	18.525	0.995516	0.980583		0.926554	0.981567	1.02878	1.00699		0.986665
1150.09	22.4	20.3	24.3	16.7	21.5	14.1	14.2	14.2	18.4625	1.00448	0.985437		0.943503	0.990783	1.01439	0.993007		0.9886
1160.09	22.1	20.4	24.7	16.5	21.2	14.4	14.2	13.8	18.4125	0.991031	0.990291		0.932203	0.976959	1.03597	0.993007		0.986577
1170.09	22.4	20.2	24	16.4	21.4	14.3	14.2	13.8	18.3375	1.00448	0.980583		0.926554	0.986175	1.02878	0.993007		0.986597
1180.1	22.5	20.4	24.3	16.5	21.7	14.5	14.3	14.4	18.575	1.00897	0.990291		0.932203	1	1.04317	1		0.995771
1190.1	22.3	20.7	23.9	16.6	21.4	14.3	14.4	14	18.45	1	1.00485		0.937853	0.986175	1.02878	1.00699		0.994109

## Sheet: Figure 5-figure supplement 1B
		Ch1-ROI1	Ch1-ROI2	Ch1-ROI3	Ch1-ROI4	Ch1-ROI5	Ch1-ROI6	Ch1-ROI7	Ch1-ROI9	Ch1-ROI11	Ch1-ROI1	Ch1-ROI2	Ch1-ROI3	Ch1-ROI4	Ch1-ROI5	Ch1-ROI6	Ch1-ROI7	Ch1-ROI8	Ch1-ROI9	Ch1-ROI10	Ch1-ROI11	Ch1-ROI12	Ch1-ROI13
Glucose		24.17	22.9975	19.8852	27.6537	26.5656	34.7994	16.0752	21.7306	18.4696	1.00136	0.999414	0.996676	0.998344	0.997781	0.999278	1.00239	0.9992	0.998341	1.0007	1.00063	0.999612	0.998395
		22.7671	21.6987	17.5375	25.5593	26.3339	33.7305	16.6723	21.4413	16.4384	0.997274	1.00168	1.00619	1.00325	1.00446	1.00177	0.99521	1.00129	1.00361	0.99863	0.999125	1.00063	1.00323
		23.5391	21.3905	16.6913	24.8873	26.6504	33.8617	17.4608	21.9822	15.8767	1.00132	0.999437	0.996808	0.998292	0.997816	0.999301	1.0023	0.99922	0.99836	1.00067	1.0006	0.999628	0.998405
	mean	23.4921	22.0289	18.038	26.0334	26.5166	34.1305	16.7361	21.718	16.9282	0.999986	1.00018	0.999891	0.999962	1.00002	1.00012	0.999967	0.999902	1.0001	1	1.00012	0.999956	1.00001
	Normalized	1	1	1	1	1	1	1	1	1	1	1	1	1	1	1	1	1	1	1	1	1	1
Pyruvate		22.2675	19.5135	14.0961	22.3717	26.0824	32.4451	17.4368	22.0026	14.0736	1.0012	0.990082	0.989602	0.974614	0.995055	0.99965	0.985396	0.937639	0.978464	1.00127	0.998665	1.01333	1.05655
		22.8089	19.945	14.0118	22.5099	26.5572	33.0736	18.1622	22.6276	14.2787	0.986179	0.978693	0.983714	0.999844	1.002	1.00256	0.987299	0.933916	0.98061	0.998191	0.985109	1.0075	1.04304
		22.978	19.961	13.8103	23.1666	26.4754	33.2853	18.2761	22.8785	14.1903	1.00989	0.992249	1.00806	1.0043	1.01575	1.0365	0.978087	0.957042	0.988555	1.01721	1.0066	1.0219	1.04301
	mean	22.6848	19.8065	13.9727	22.6827	26.3717	32.9347	17.9584	22.5029	14.1809	0.999087	0.987008	0.993793	0.99292	1.00427	1.0129	0.983594	0.942865	0.982543	1.00556	0.99679	1.01424	1.04753
	normalized	0.965636	0.899114	0.774626	0.871293	0.994534	0.964962	1.07303	1.03614	0.837708	0.999101	0.986832	0.993901	0.992958	1.00425	1.01279	0.983626	0.942958	0.982442	1.00556	0.996672	1.01429	1.04752
	Glucose	Pyruvate
Average	1	0.971815
SEM	0	0.0148772
	22	22

## Sheet: Figure 5-figure supplement 1C
	Before pacing	1Hz pacing	After pacing
	0.846828	0.796588	0.894074
	0.955827	0.862451	0.838935
	0.985221	0.954213	1.02521
	1.03727	1.10698	1.14298
	0.98664	0.964181	0.905848
	0.885841	0.695431	0.644389
	0.963453	0.931968	0.854103
	0.977067	0.941567	0.763977
	1.0167	1.06256	1.13636
	0.968499	0.885992	0.857857
	1.0514	1.22009	1.25035
	1.02474	1.08591	1.12658
	1.05269	1.11699	1.17425
	0.994696	0.97315	0.916185
	0.996261	0.9401	0.958609
	1.02047	1.07007	1.11499
	1.00686	1.01329	1.03557
	0.97405	0.926251	0.92744
	0.987207	1.00823	1.0227
	0.997292	1.03347	1.08003
Average	0.98645	0.979475	0.983521
SEM	0.0111301	0.0266529	0.0343508
N	20	20	20

## Sheet: Figure 5-figure supplement 1D
	5.6 mM Glucose	10 mM Pyruvate			before pacing	1Hz pacing	after pacing			control	ISO-1M	0-Ca 5mM-EGTA
	Glucose	Pyruvate			Before pacing	Pacing	After pacing			Control	ISO	EGTA
	1	1.0169			1	0.983656	0.984895			1	1.0034	0.976726
	1	1.01111			1	0.993268	0.986477			1	1.01888	1.07718
	1	1.01169			1	0.983526	0.985399			1	1.01848	0.96113
	1	1.01036			1	0.991677	0.990078			1	1.0143	0.965641
	1	1.00989			1	0.988056	0.989516			1	1.01269	1.05031
	1	1.01072			1	1.00675	1.00774			1	1.01601	1.00007
	1	1.00658			1	1.00845	1.00282			1	1.02458	0.989763
	1	1.0093			1	0.986049	0.967247			1	1.01443	1.01252
	1	1.0775			1	1.01788	1.00524			1	1.0034	0.989865
	1	1.09704			1	0.999322	0.988885			1	1.00541	1.00868
	1	1.05954			1	0.995162	0.988392			1	1.01393	0.988677
	1	1.00937			1	0.996684	0.992864			1	1.00913	1.03444
	1	1.00103			1	1.02628	1.0476			1	1.00962	0.990969
	1	1.15801			1	0.991074	0.991909			1	1.00606	0.993615
	1	1.00648			1	0.992198	0.99013			1	1.01075	0.991356
	1	0.995244			1	0.997507	0.990998			1	0.998043	0.956428
	1	0.997752			1	1.00712	1.00741			1	1.00247	0.949201
	1	0.98713			1	0.986668	0.991248			1	0.982416	1.0223
	1	0.991268			1	1.00293	1.0051			1	0.997613	1.04889
	1	0.963521			1	0.995558	0.994259			1	0.97672	1.05449
	1	1.0051			1	0.996278	1.00066			1	0.99608	0.986036
	1	0.989238			1	1.0002	0.996009			1	1.00004	1.08668
	1	0.990033			1	0.998553	0.998893			1	0.995811	1.05713
	1	1.01329			1	0.990406	0.982758			1	0.994912	0.966806
	1	1.01663			1	0.995996	0.99218			1	1.00514	1.01836
	1	0.998413			1	0.995901	1.01368			1	0.983135	1.09851
	1	1.00344			1	0.998826	1.00863			1	0.994793	1.07952
	1	1.01081			1	0.987744	1.0263			1	0.997479	1.04199
	1	1.02833			1	1.00669	1.00629			1	1.03465	1.08187
	1	1.00203			1	0.997089	0.980825			1	0.967689	0.93459
	1	1.03315			1	0.99933	0.986798			1	1.02241	0.965603
	1	1.00663			1	0.991567	0.982699			1	1.02447	0.957171
	1	1.02077			1	0.995793	0.989487			1	1.03513	0.951917
	1	1.00887			1	0.992933	0.963675			1	1.0182	0.984271
	1	0.976088			1	1.00005	0.999785			1	0.978568	1.06938
	1	1.00831			1	1.0001	0.993169			1	1.02772	1.05831
	1	0.985184			1	0.999583	0.998902			1	1.0024	1.10609
	1	0.991418			1	0.973593	0.986798			1	1.02957	0.98341
	1	1.01033			1	0.972187	0.982699			1	1.03264	1.03541
	1	1.02588			1	0.98411	0.989487			1	0.998087	1.02923
	1	1.01912			1	0.992374	0.963675			1	1.00878	0.982546
	1	1.03514			1	0.974575	0.999785			1	0.99083	0.986242
	1	1.00324			1	0.973536	0.993169			1	1.01308	0.977967
	1	1.00141			1	1.00449	0.998902			1	1.0108	0.990691
	1	1.00193			1	0.991194	0.96885			1	1.00589	0.976177
	1	1.01008			1	0.990273	0.955674			1	0.977594	0.990751
	1	1.02382			1	0.95664	0.982482			1	1.01999	1.01066
	1	1.03977			1	0.946296	0.960028			1	1.00569	0.984373
	1	1.00911			1	0.990728	0.974418			1	0.972357	0.998027
	1	1.0038			1	0.952234	0.930106			1	0.991135	0.984996
	1	0.937679			1	0.956004	0.99511			1	0.982403	1.00182
	1	0.936925			1	0.919889	0.990425			1	0.99129	1.00714
	1	1.0197			1	0.998612	0.973599			1	0.991903	0.975819
	1	1.00674			1	0.982098	0.980777			1	0.988543	0.988822
	1	1.04945			1	0.989088	0.966447			1	1.00176	0.988377
	1	1.00739			1	1.00001	0.963198			1	0.98516	0.926286
	1	1.00887			1	0.954385	1.01122			1	0.990622	1.03296
	1	0.960201			1	0.984931	1.01534			1	0.98035	1.00124
	1	1.03658			1	1.00688	0.934638			1	0.984835	0.995511
	1	1.01765			1	1.02212	0.967816			1	0.987728	1.04759
	1	1.052			1	0.969521	0.955578			1	1.00894	1.02484
	1	0.961899			1	0.981491	0.98349			1	0.986185	0.999216
	1	1.02609			1	0.990461	0.945453			1	0.99751	1.01452
	1	0.943796			1	0.996313	0.927466			1	0.968621	1.01555
	1	1.07309			1	0.98021	0.969433			1	0.986058	0.996654
	1	0.987097			1	0.983061	0.97297			1	0.966001	1.04609
	1	1.13362			1	0.99254	0.946638
	1	0.983003			1	0.992917	0.948066
	1	0.927725			1	0.983922	0.987718
	1	0.960612			1	0.982576	0.919134
	1	0.998317			1	0.997306	0.938616
	1	0.937932			1	0.984034	0.97569
	1	0.927089			1	0.981487	1.01314
	1	0.998786			1	1.00852	0.981036
	1	1.00811			1	1.00977	0.991259
	1	1.02676			1	1.00047	0.996625
					1	1.00242	1.00525
					1	0.995775	0.966514
					1	1.00364	0.970537
Average	1	1.00827			1	0.990501	0.983648			1	1.00108	1.00757
N	76	76			79	79	79			66	66	66
SEM	0	0.00445059			0	0.00186953	0.00256737			0	0.00207777	0.00492502

[truncated: 8 more sheets: Figure 5-figure supplement 2A, Figure 5-figure supplement 2B, Figure 5-figure supplement 2C, Figure 5-figure supplement 3, Figure 5-figure supplement 4A, Figure 5-figure supplement 4B, Figure 5-figure supplement 4C, Figure 5-figure supplement 5]
